# Supplementary material for: Genome-wide Association Study of Subcortical Brain Structures in Japanese Ancestry: The Tohoku Medical Megabank Brain Magnetic Resonance Imaging Study
Source: Research Square preprint supplement (doi:10.21203/rs.3.rs-8692327/v1), 2026-02-12

**Supplementary figure**

Figure S1. Manhattan and QQ plots for subcortical structures in the discovery sample. For the manhattan plots, the red line indicates the genome-wide significance threshold (5.0x10-8 p-value), the blue line the suggestive threshold (1.0x10-5).

Nucleus accumbens


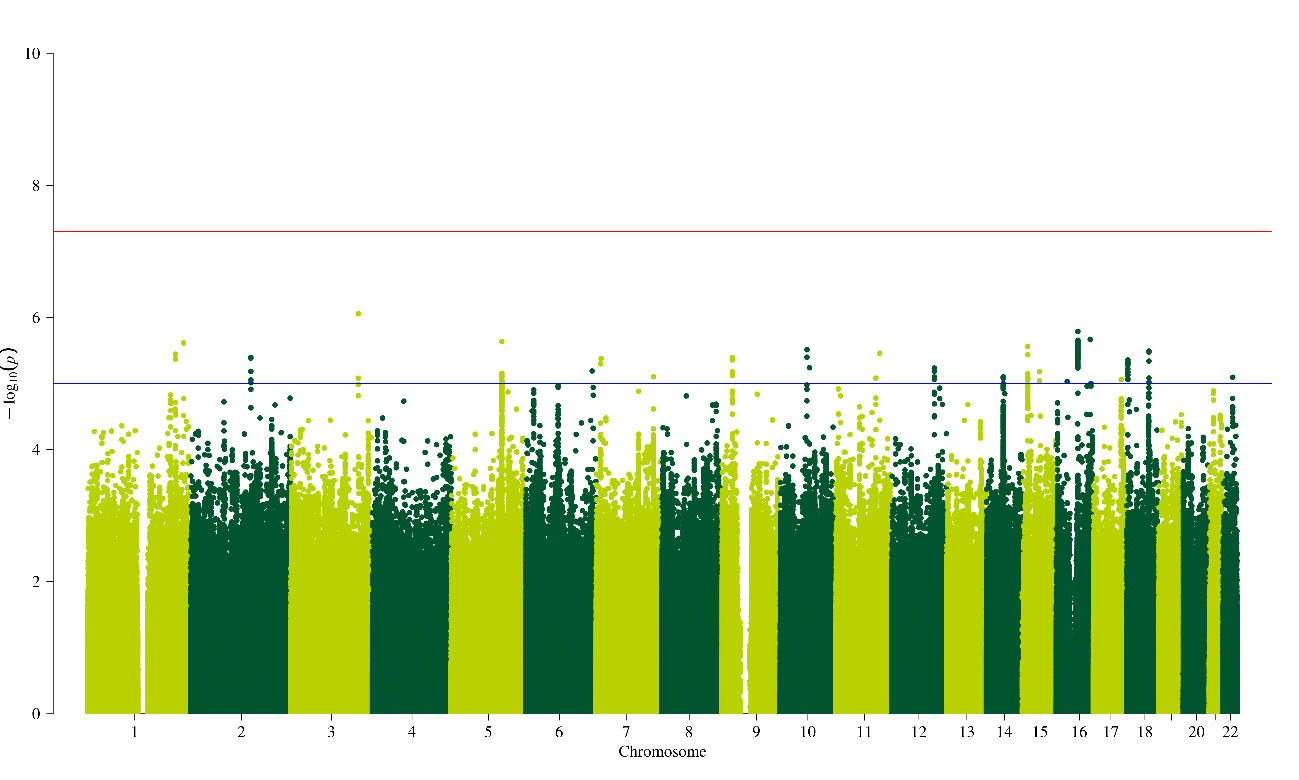


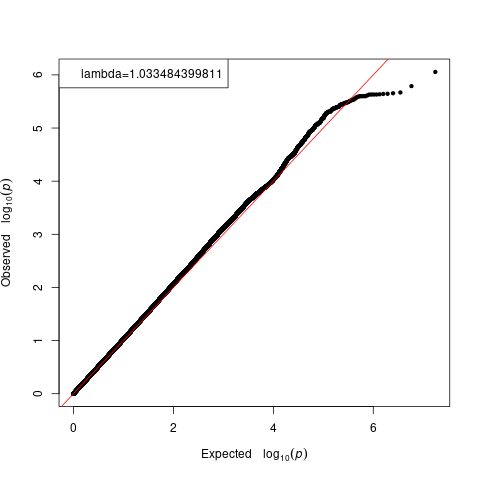


Amygdala


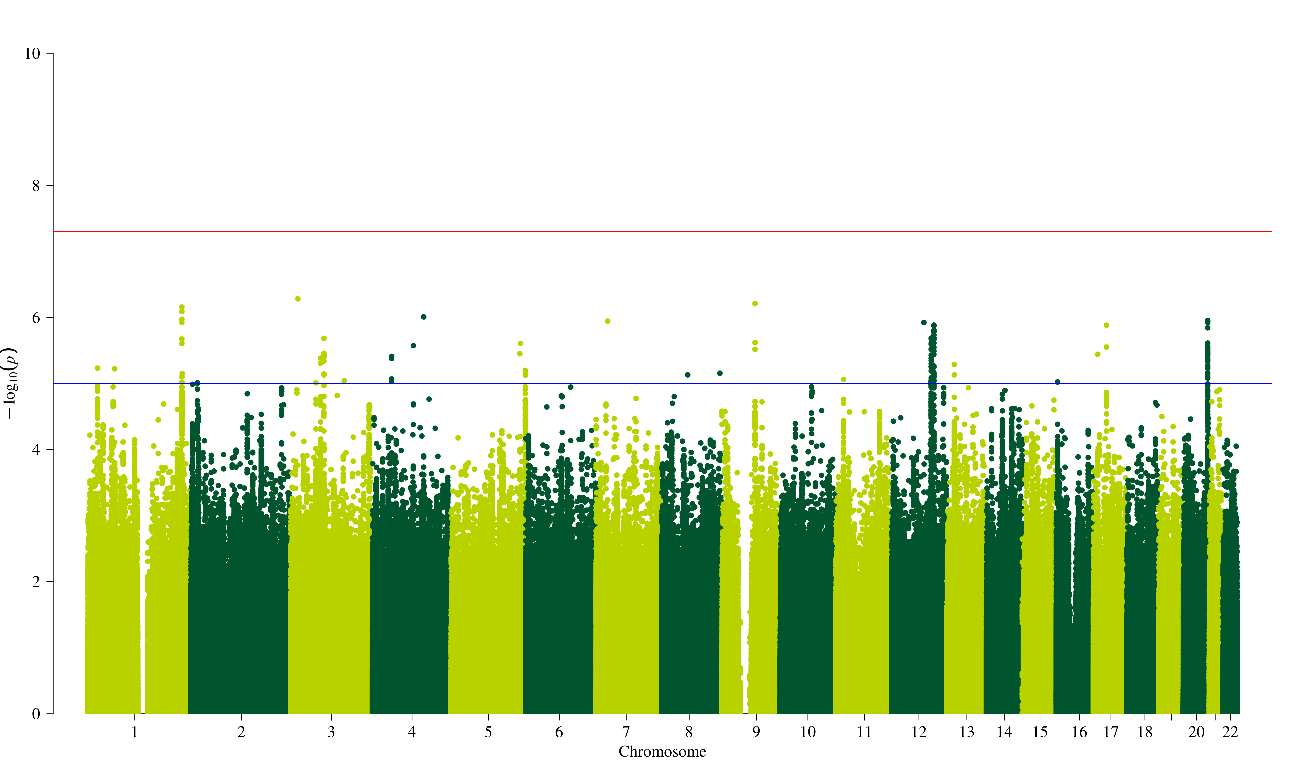


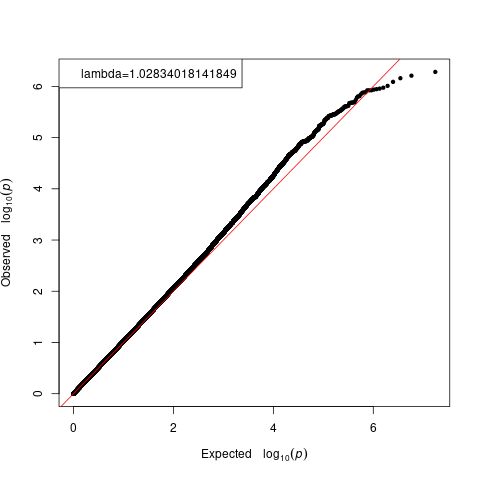


Caudate


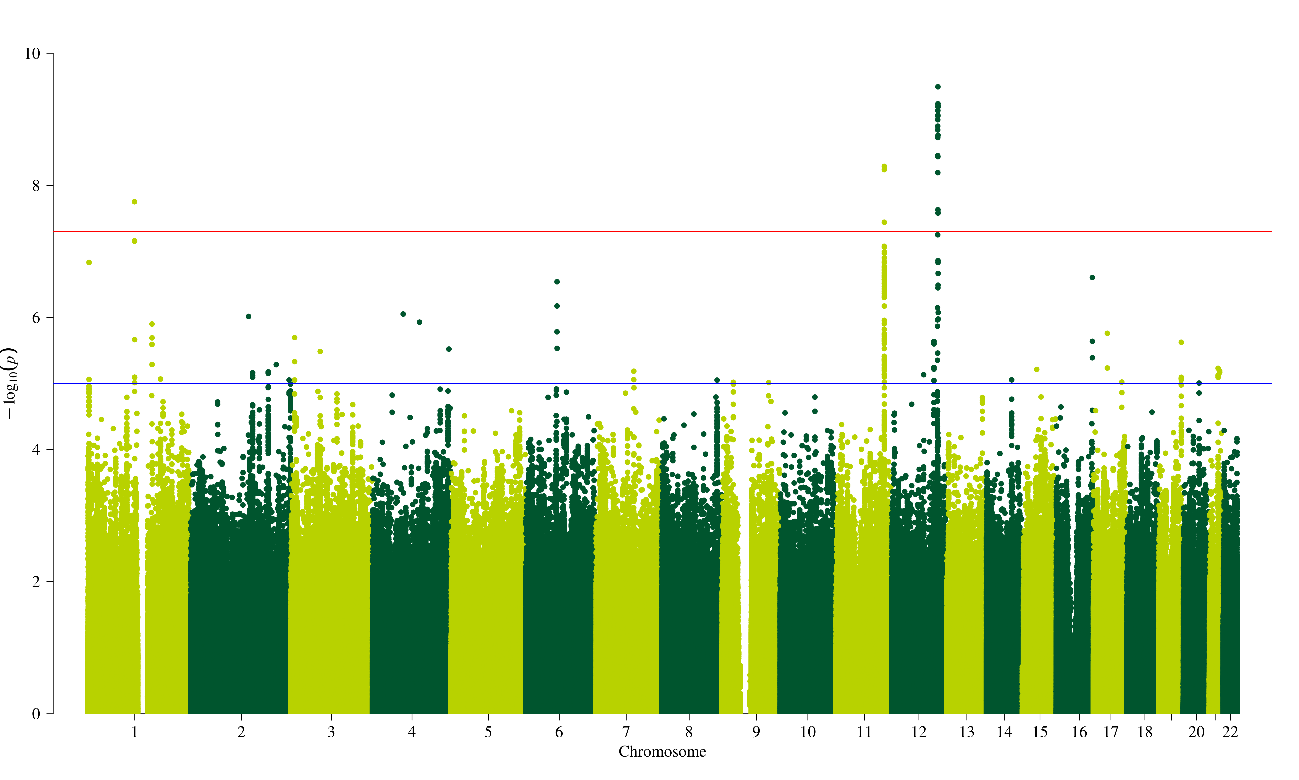


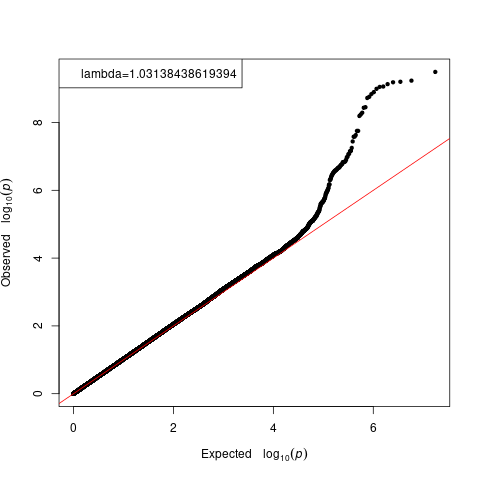


Hippocampus


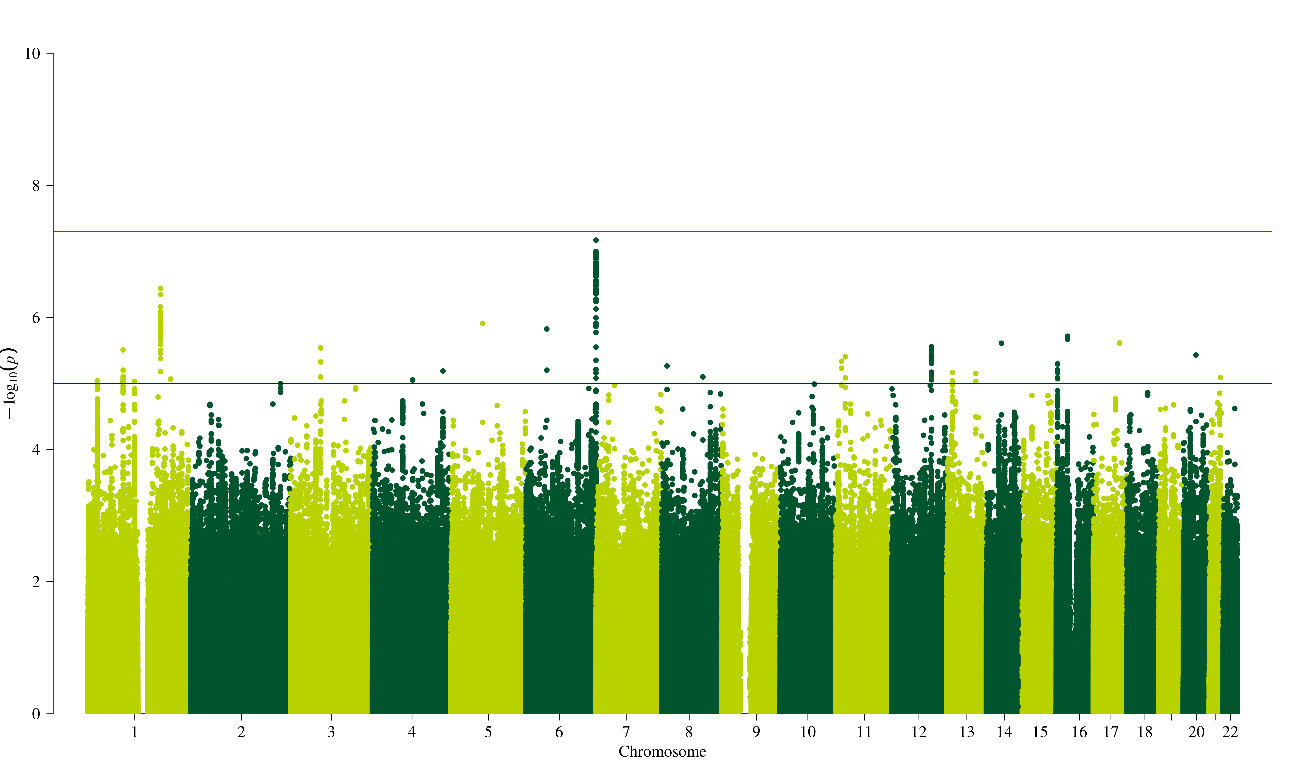


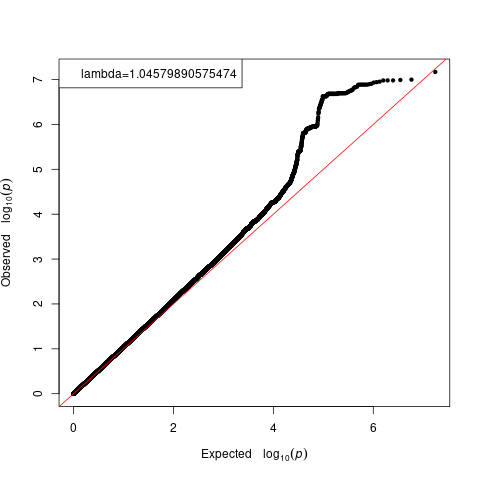


Pallidum


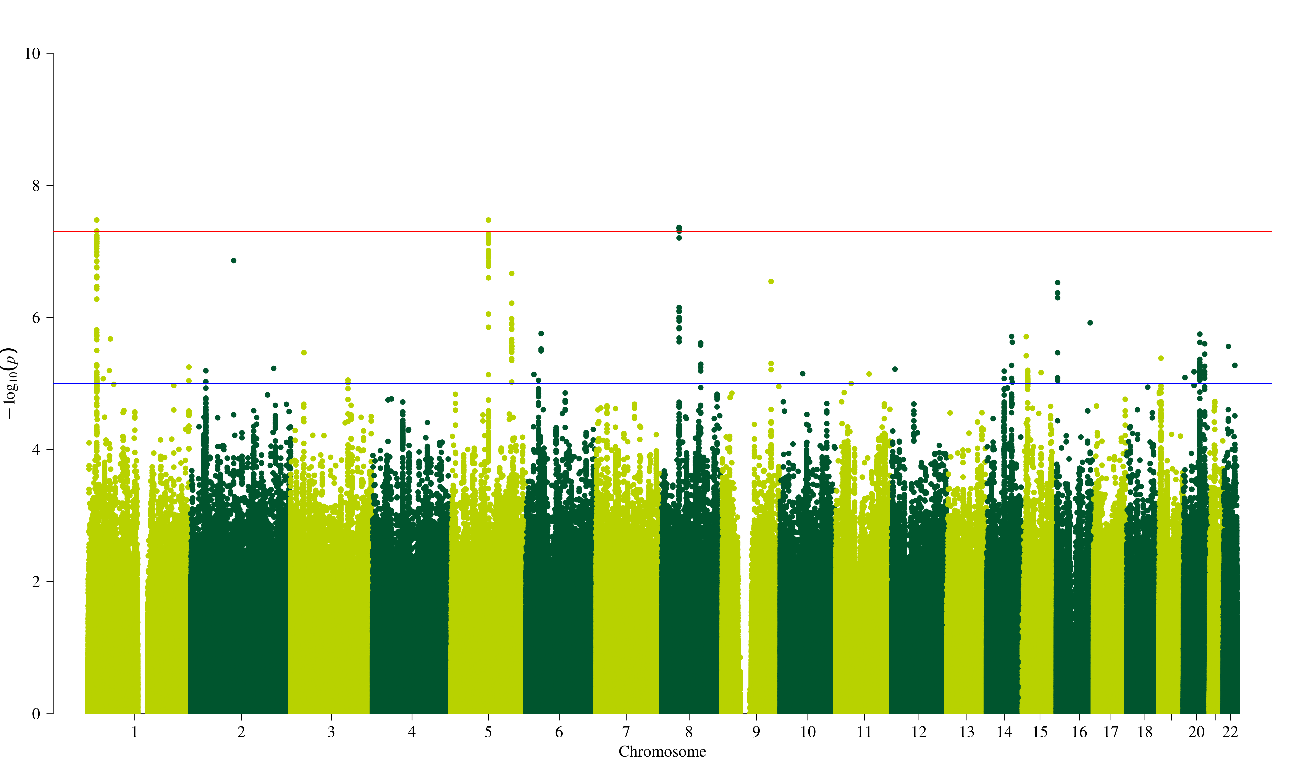


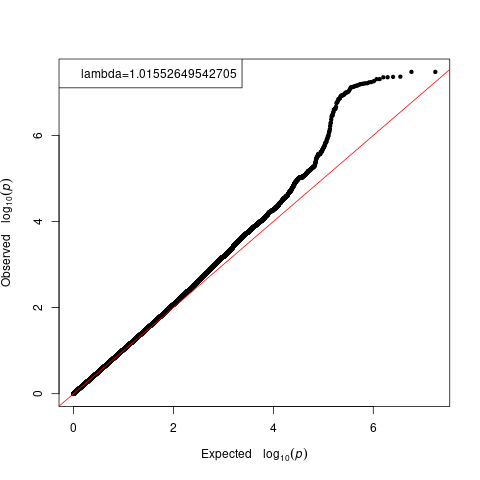


Putamen


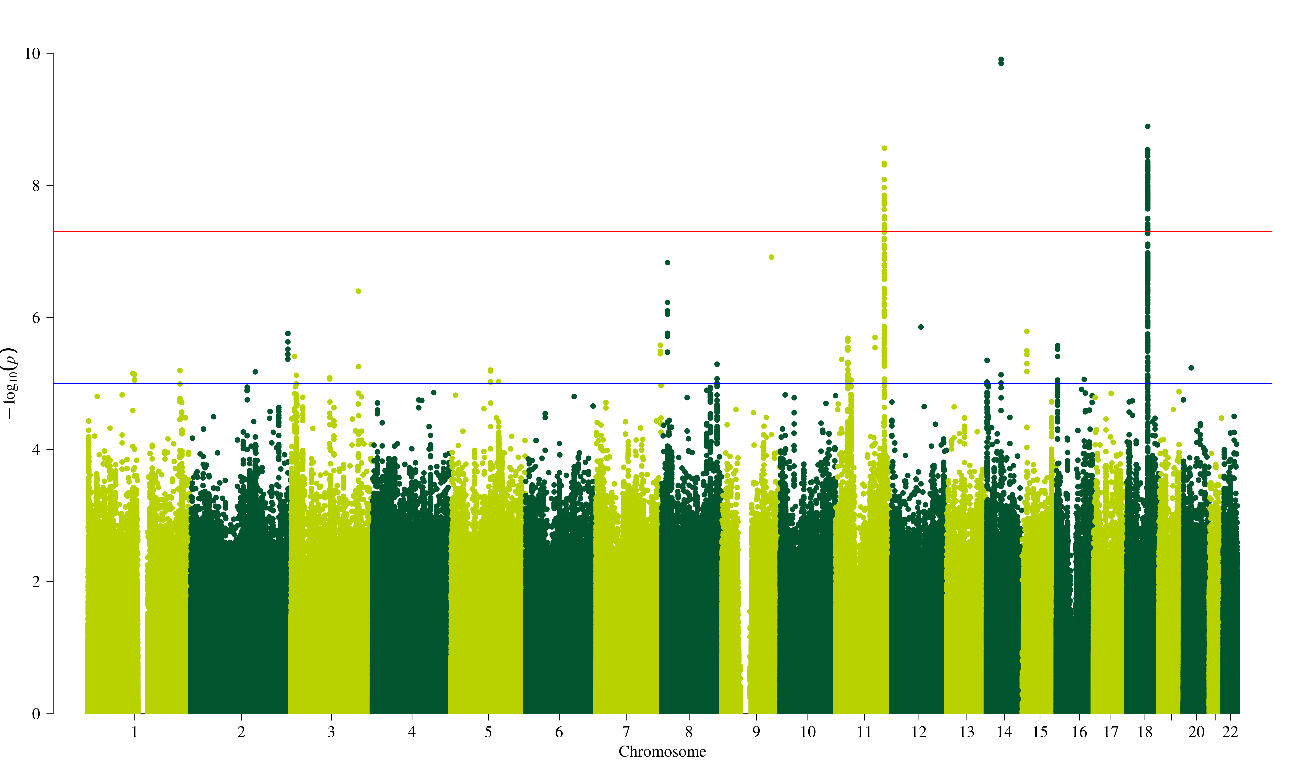


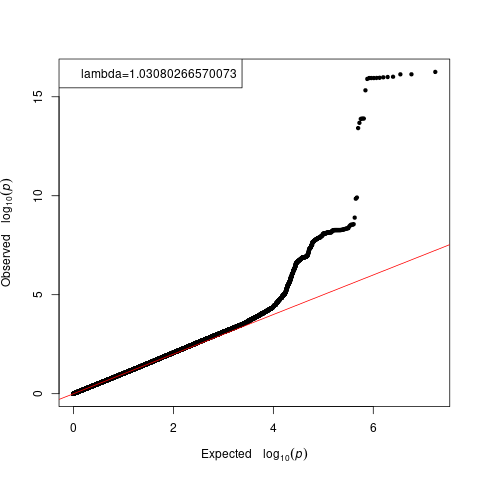


Thalamus


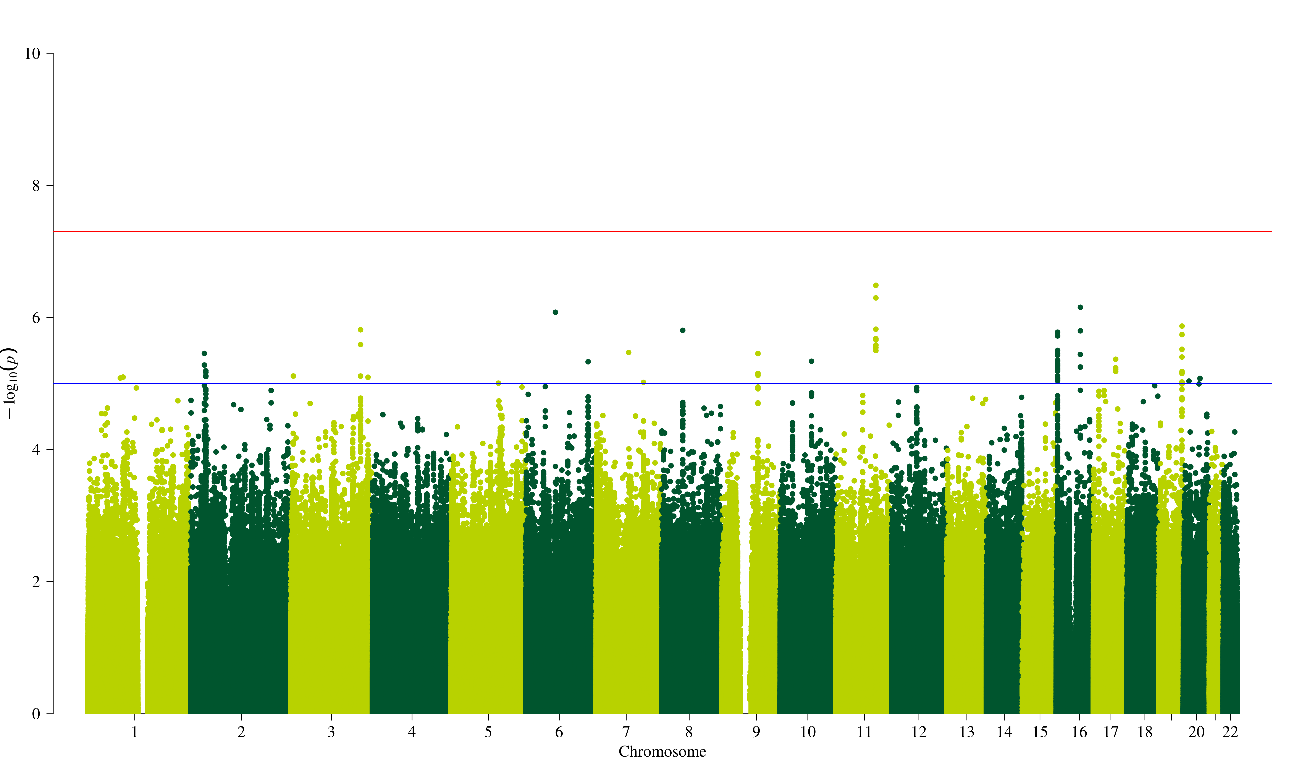


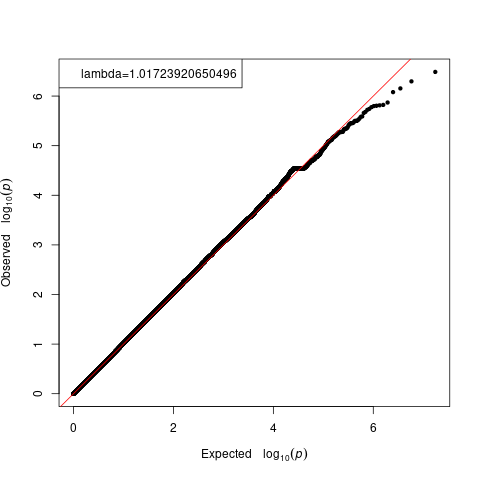


Brainstem


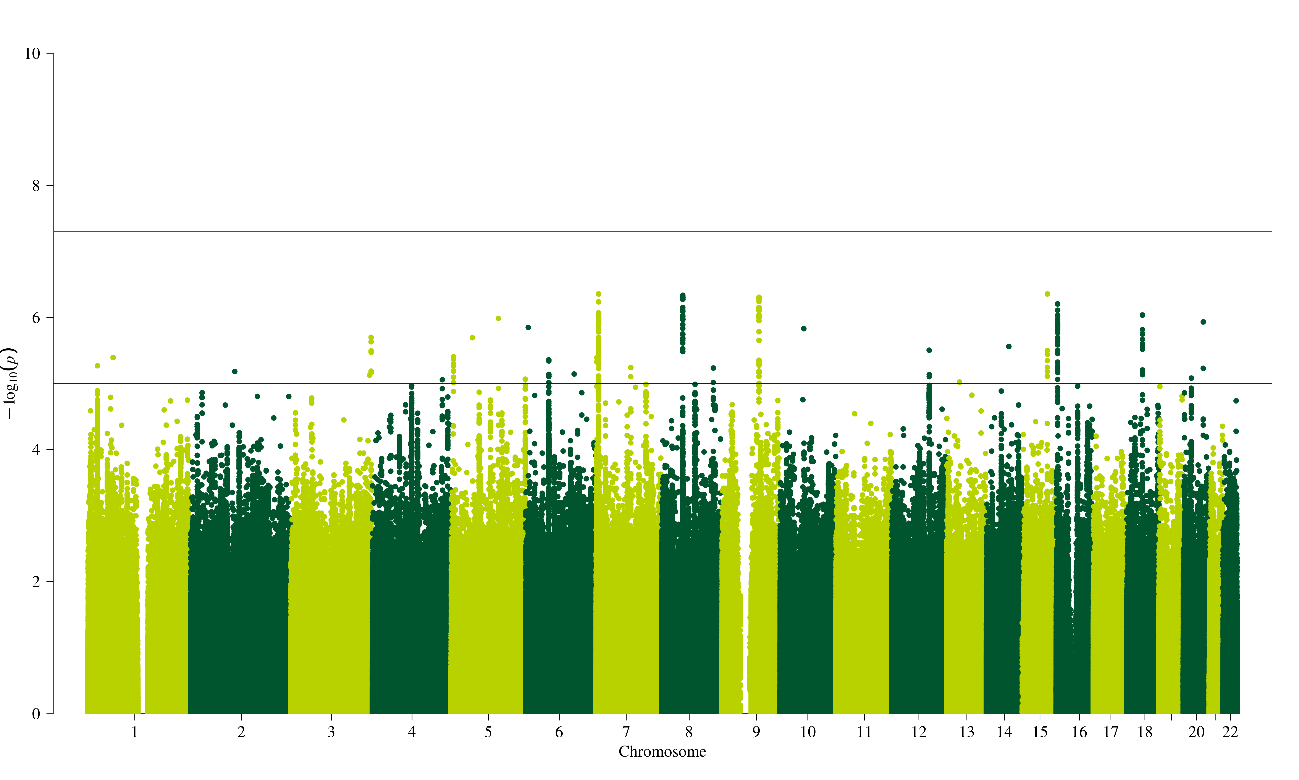


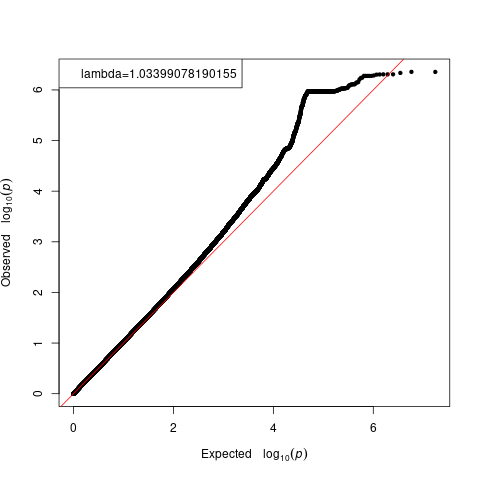


Figure S2. Manhattan and QQ plots for subcortical structures in the replication sample. For the manhattan plots, the red line indicates the genome-wide significance threshold (5.0x10-8 p-value), the blue line the suggestive threshold (1.0x10-5).

Nucleus accumbens


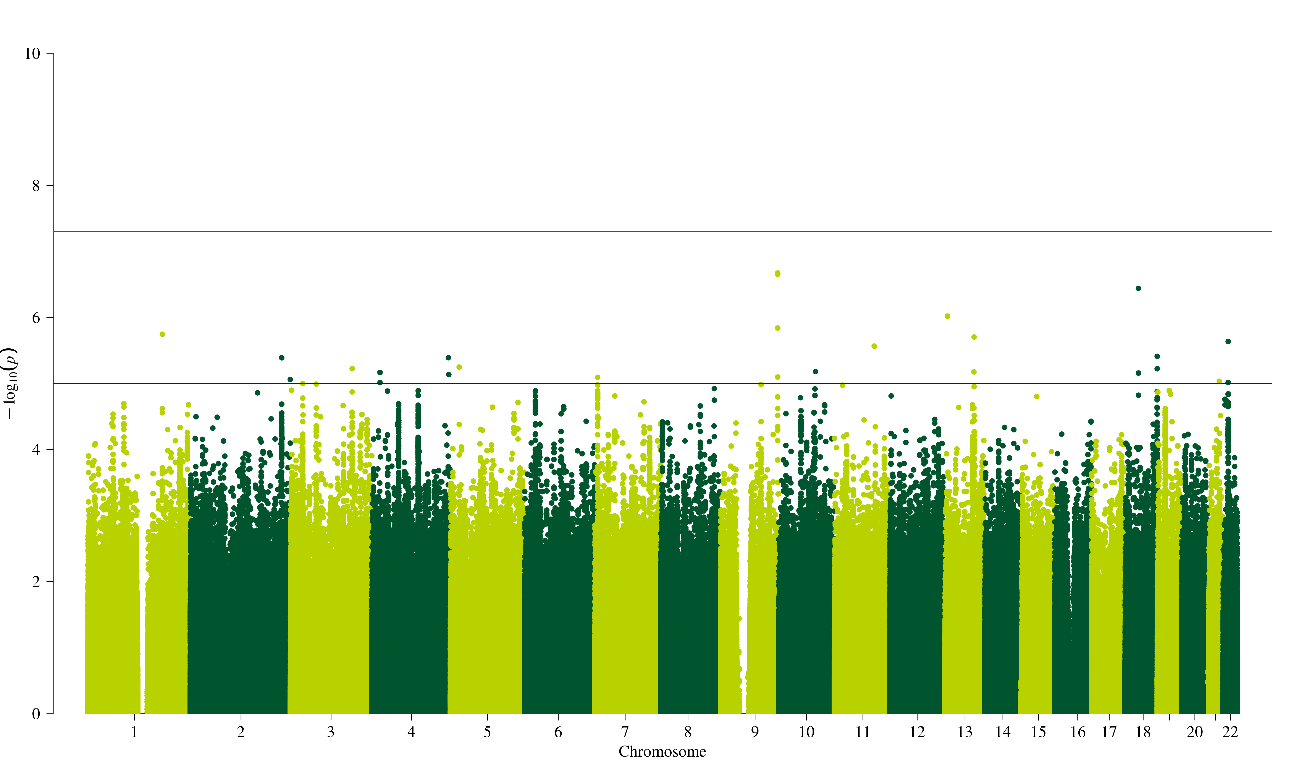


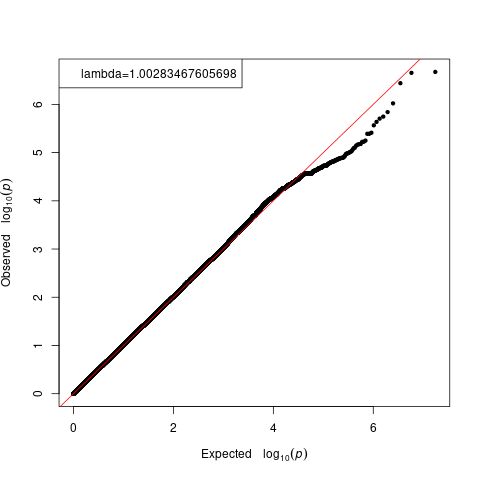


Amygdala


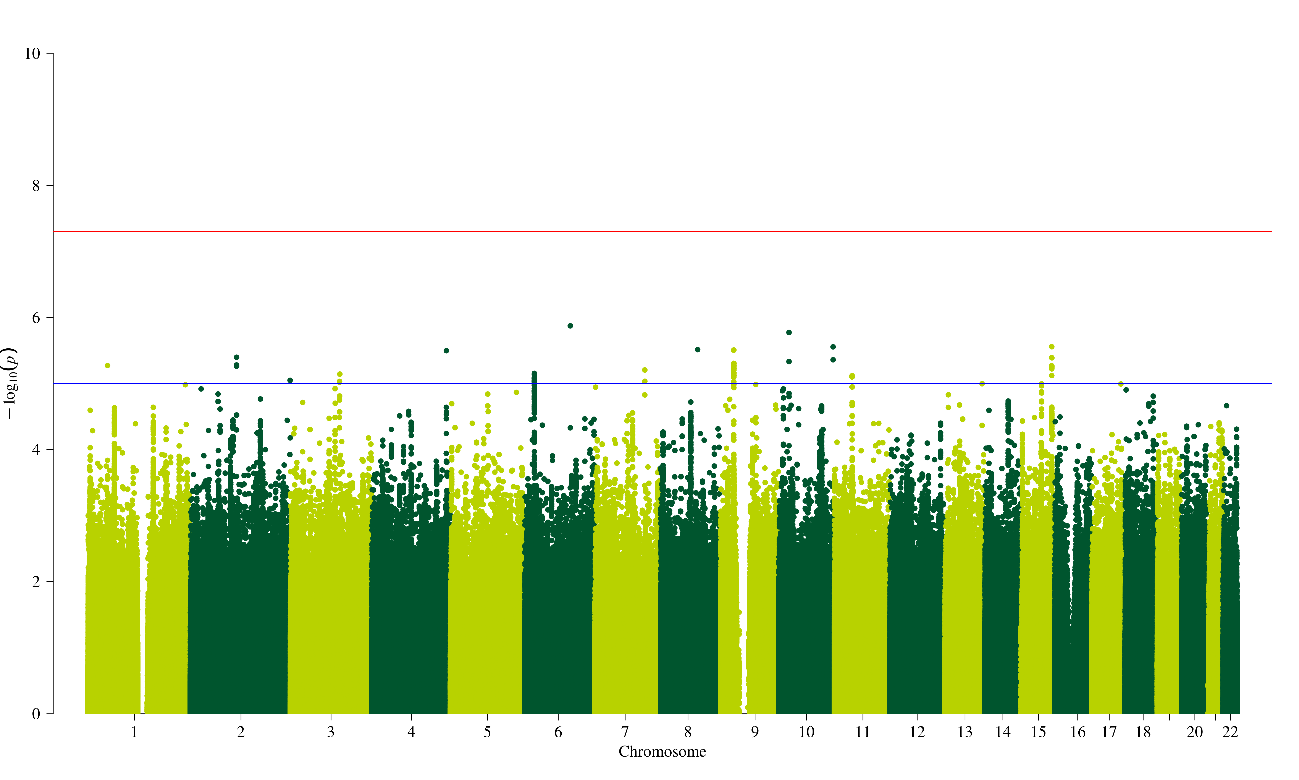


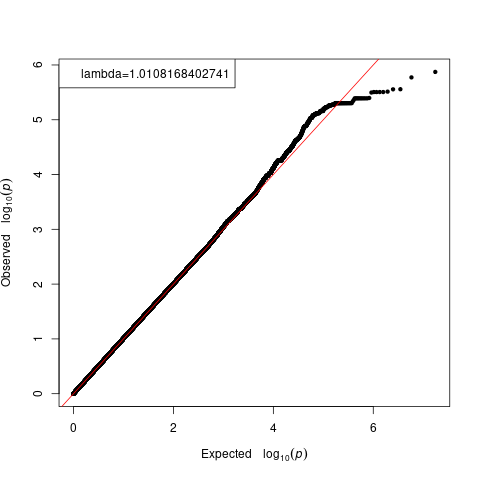


Caudate


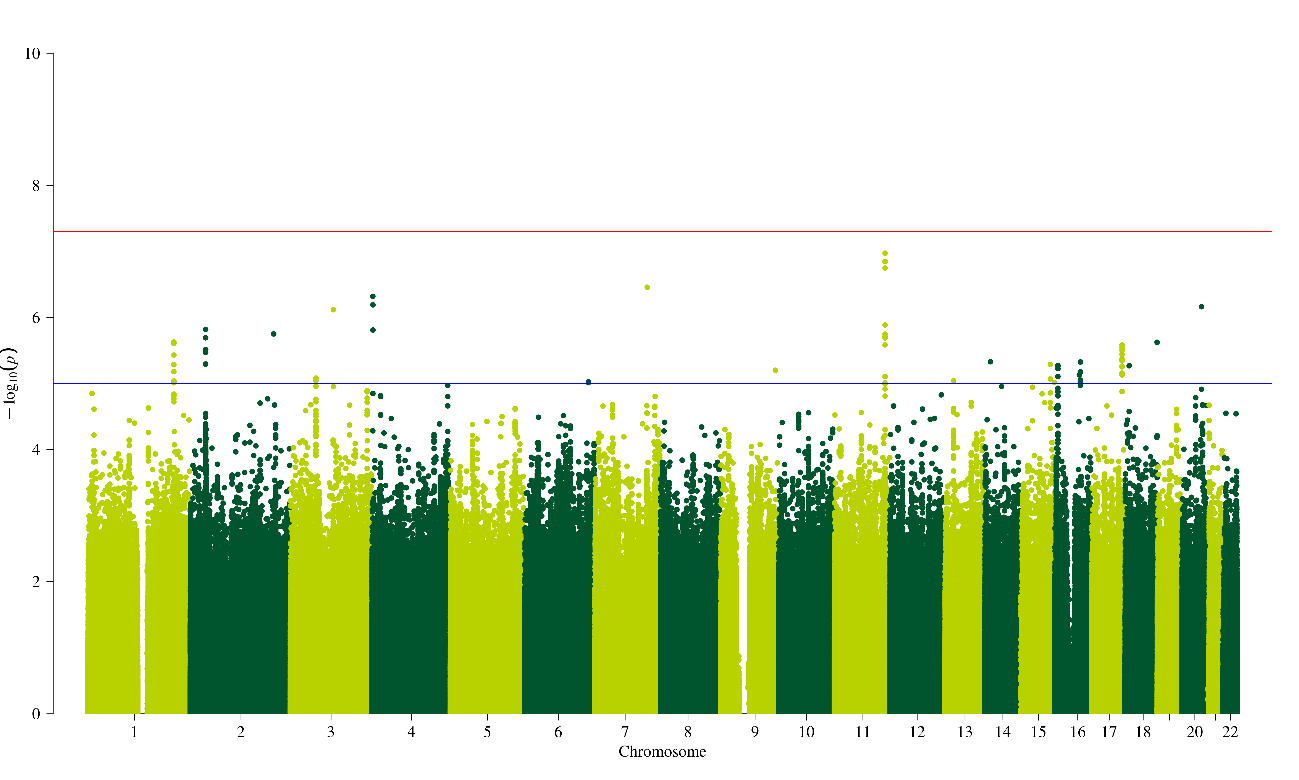


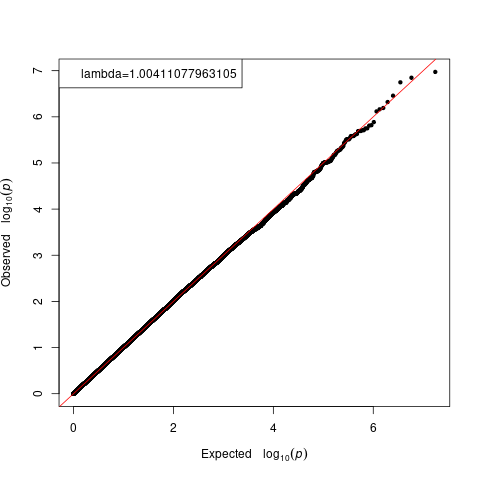


Hippocampus


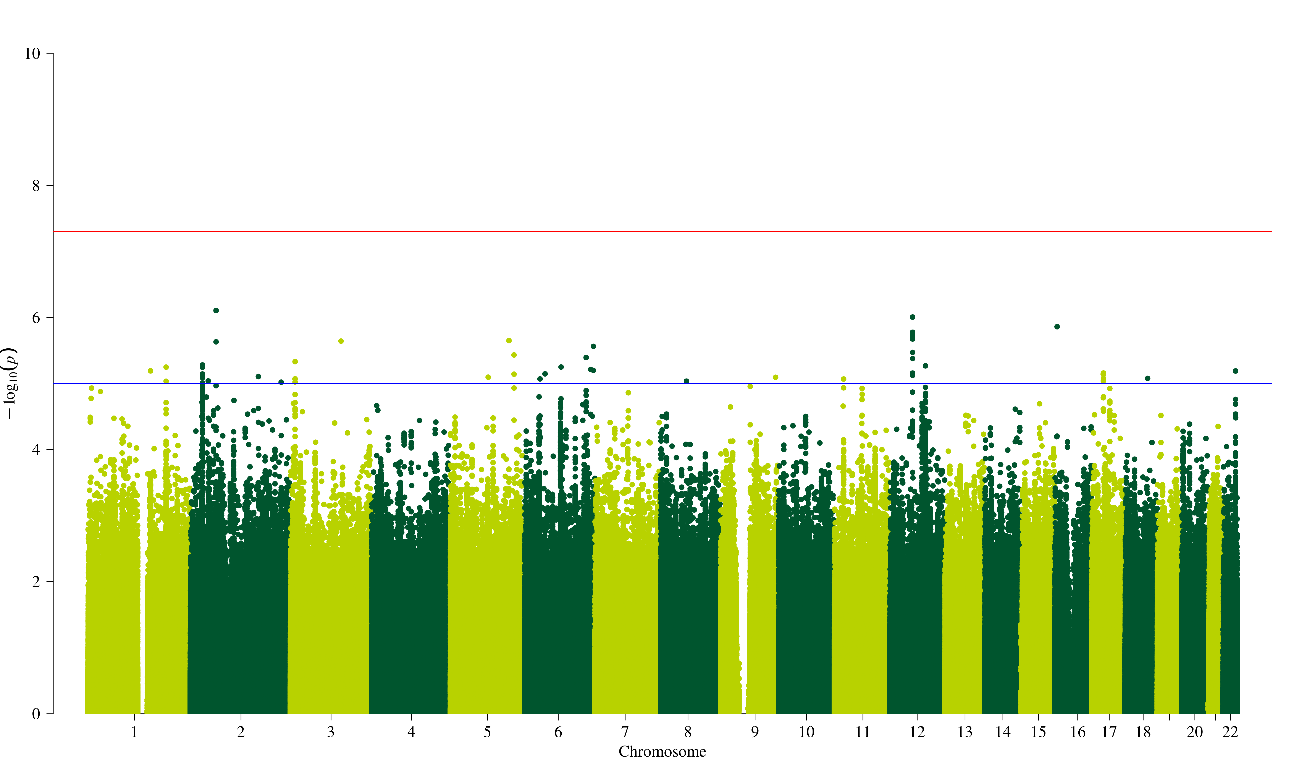


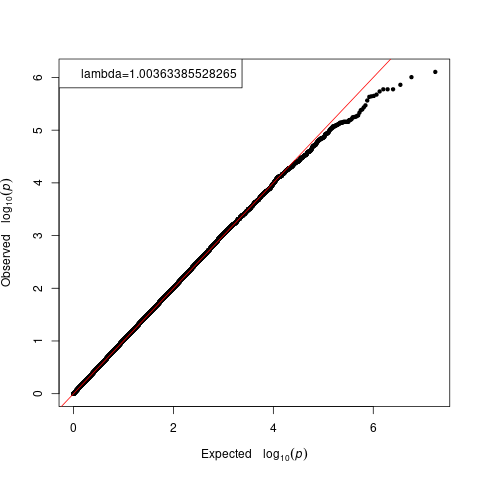


Pallidus


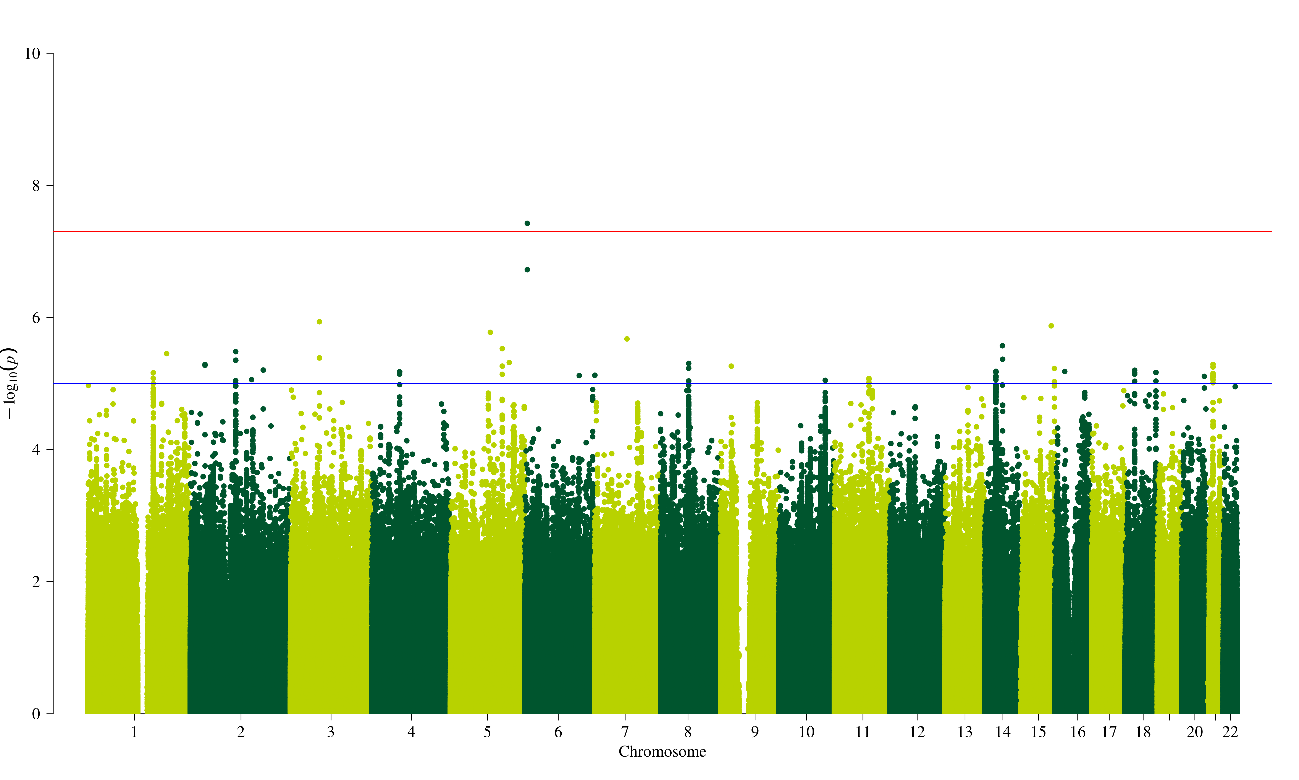


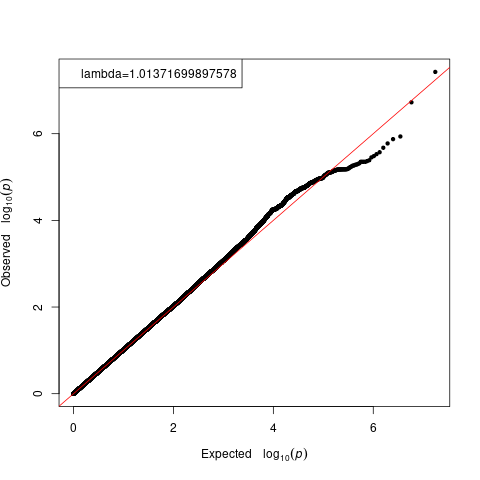


Putamen


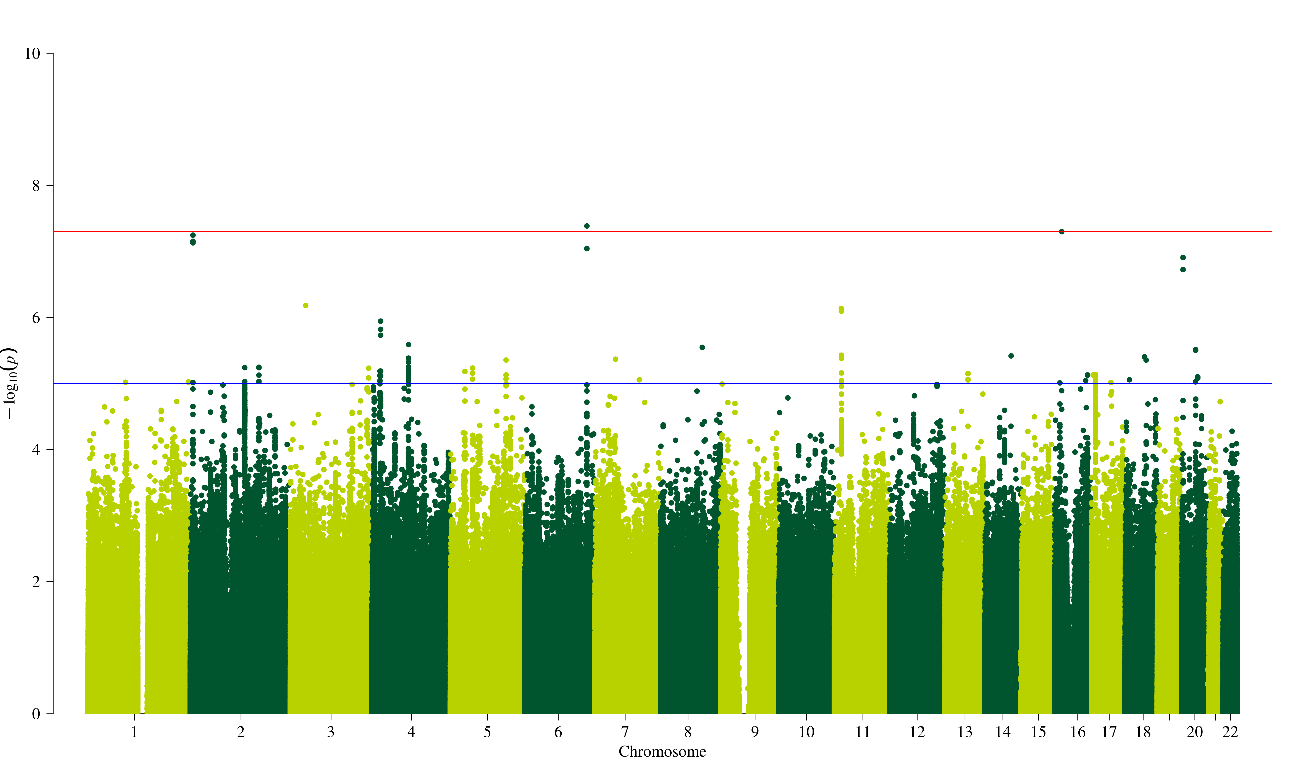


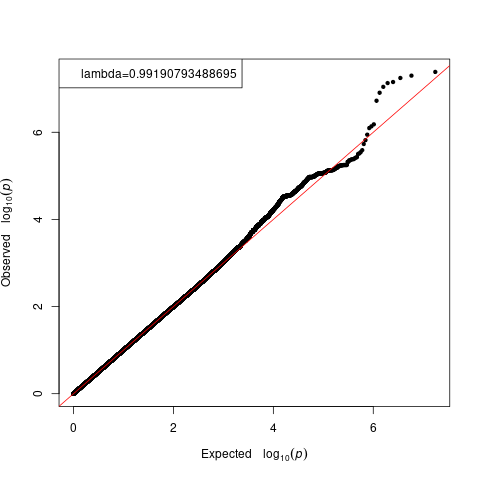


Thalamus


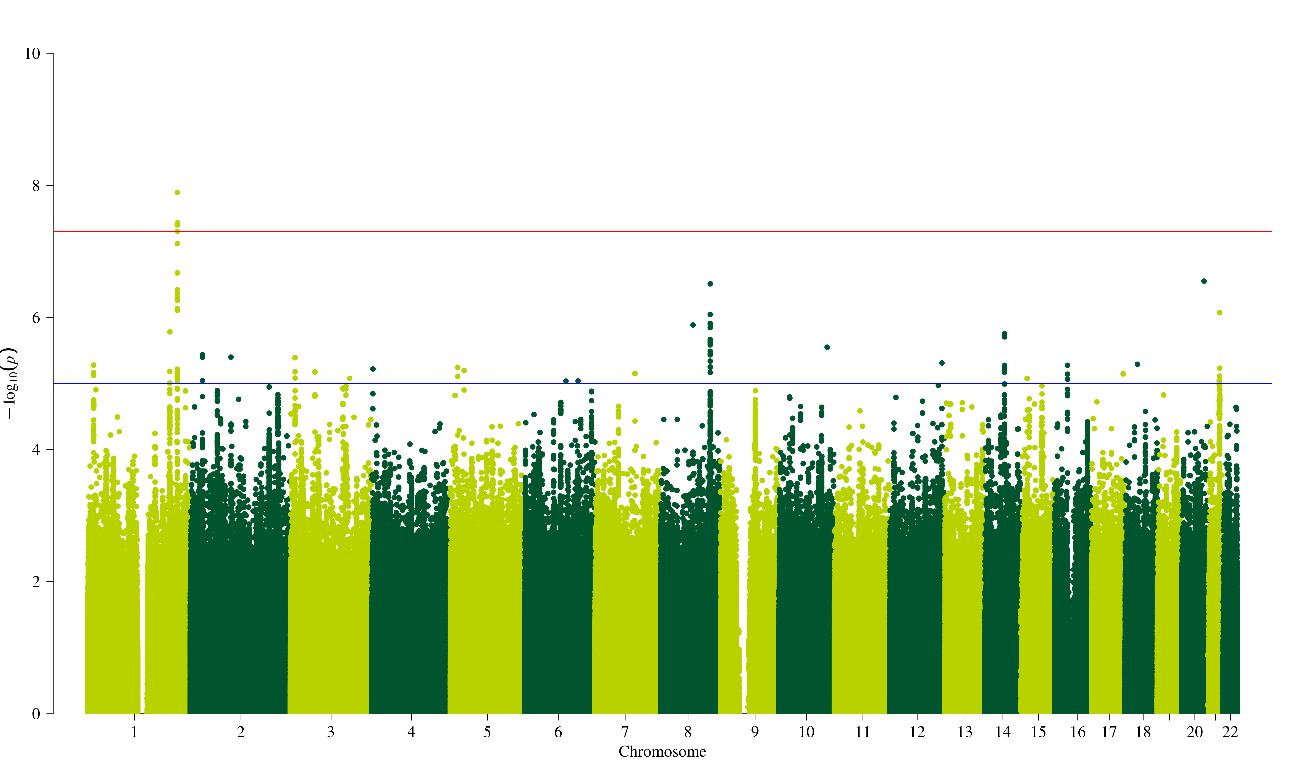


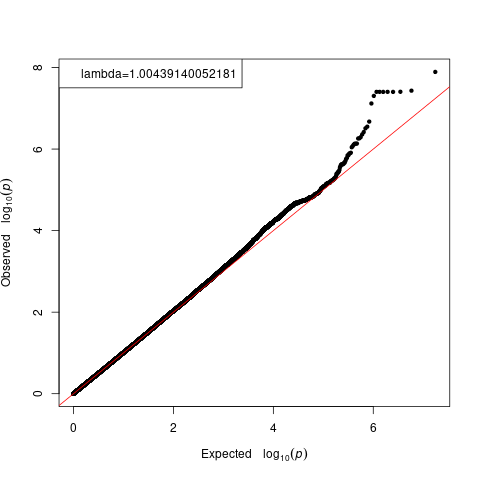


Brainstem


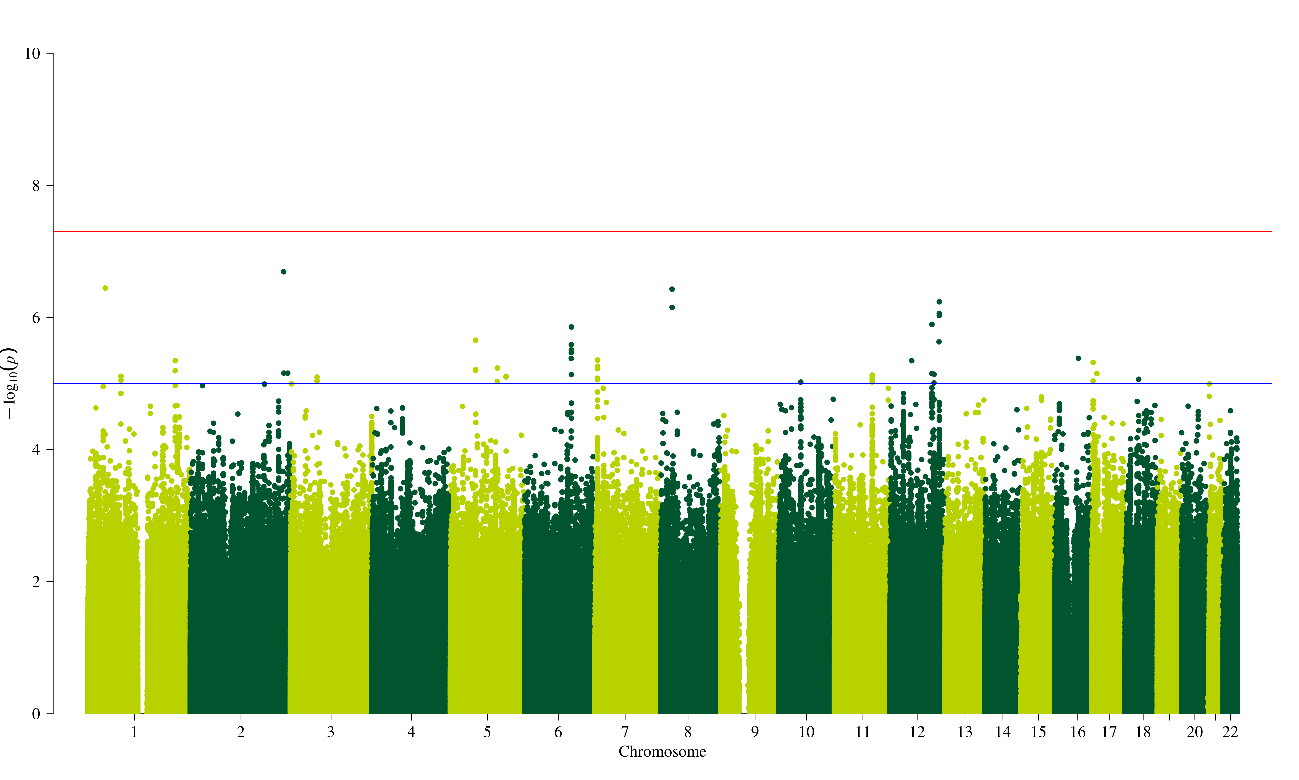


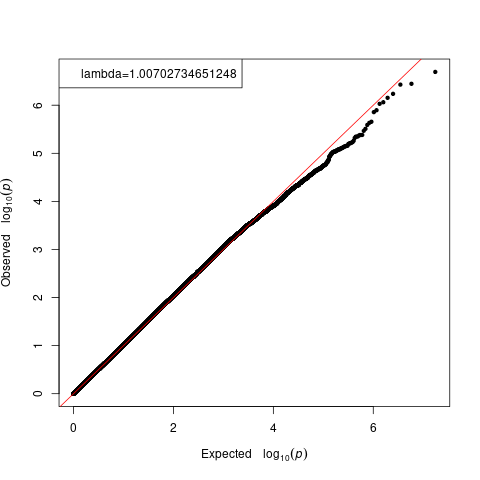


Figure S3. Manhattan and QQ plots for subcortical structures in the combined meta-analysis. For the manhattan plots, the red line indicates the genome-wide significance threshold (5.0x10-8 p-value), the blue line the suggestive threshold (1.0x10-5).

Nucleus accumbens


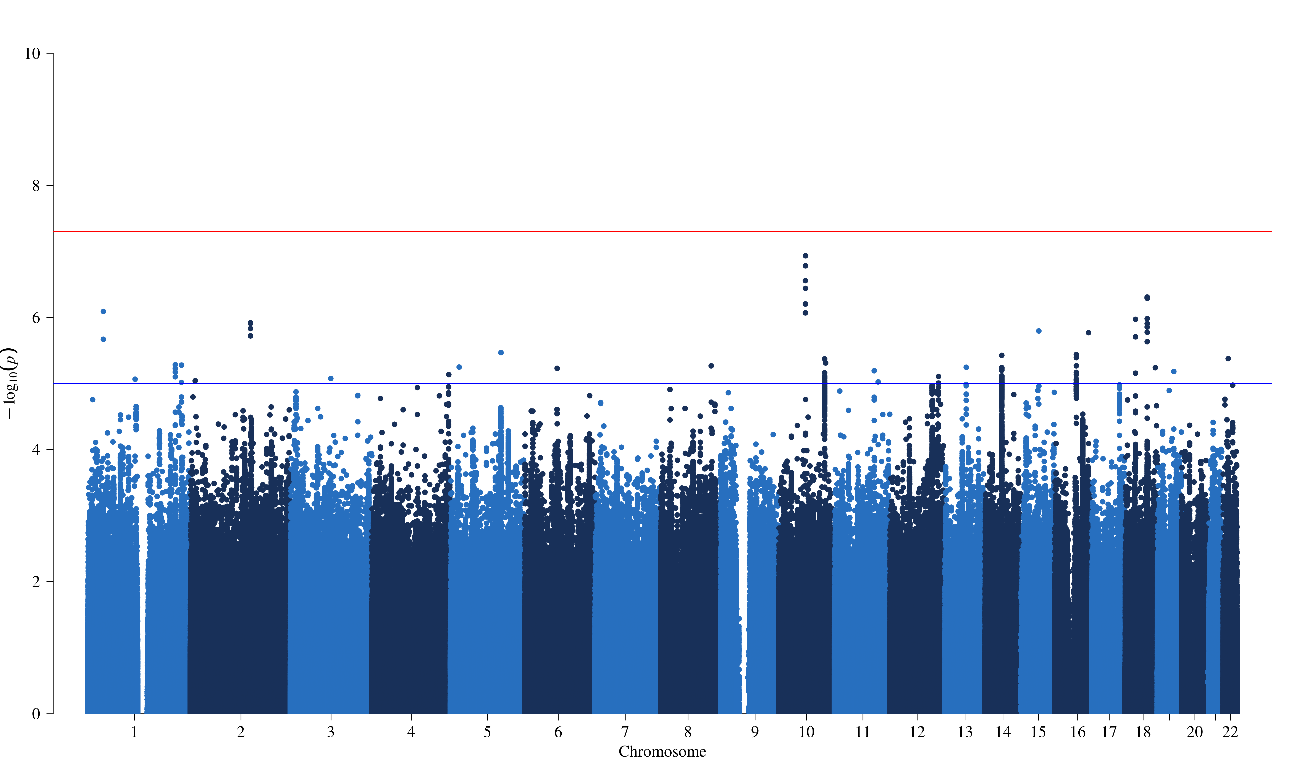


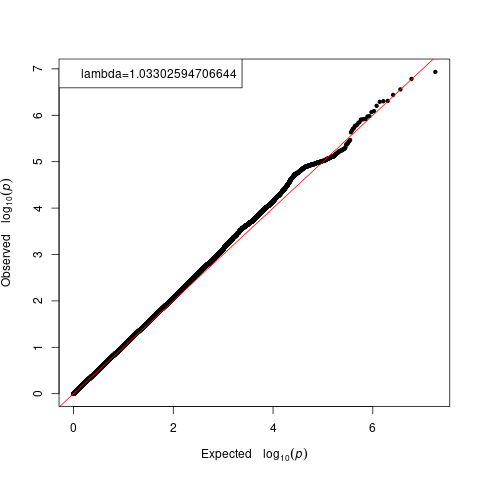


Amygdala


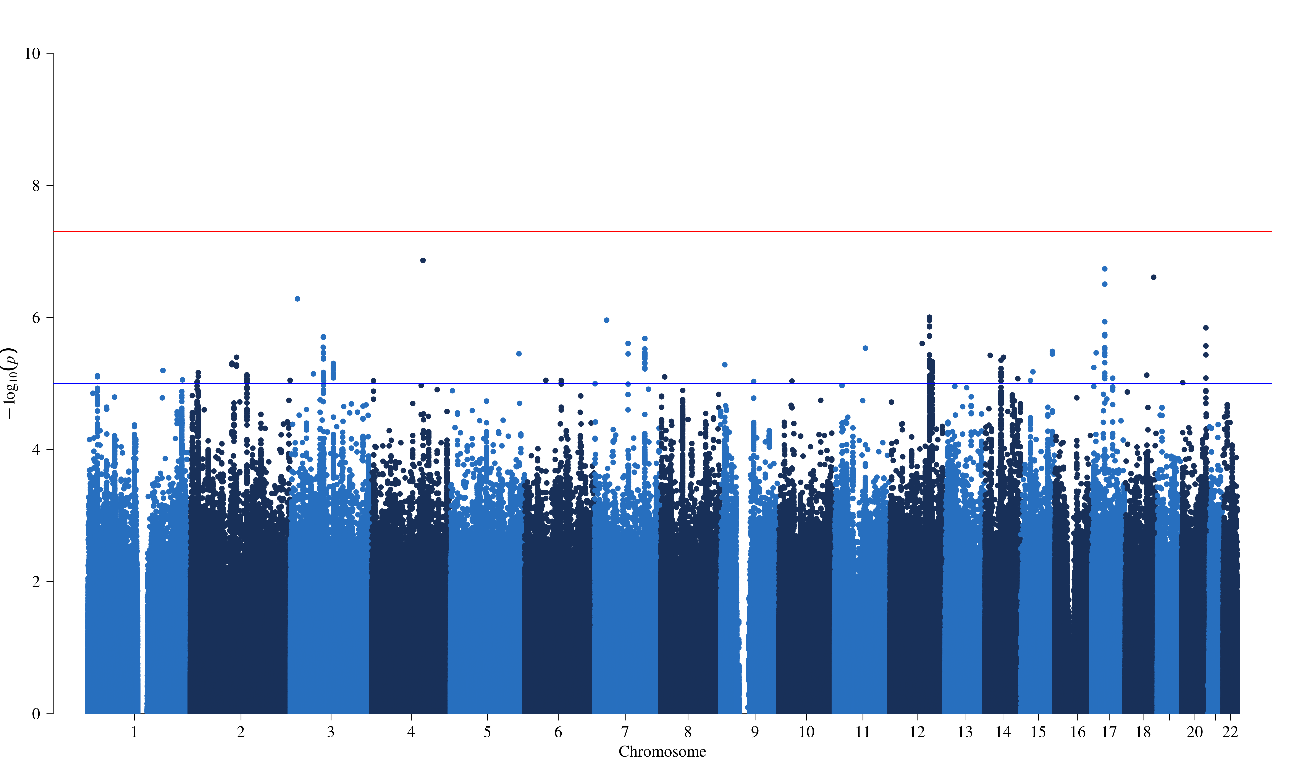


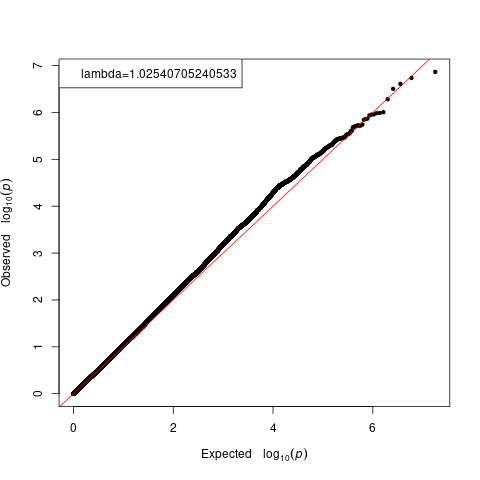


Caudate


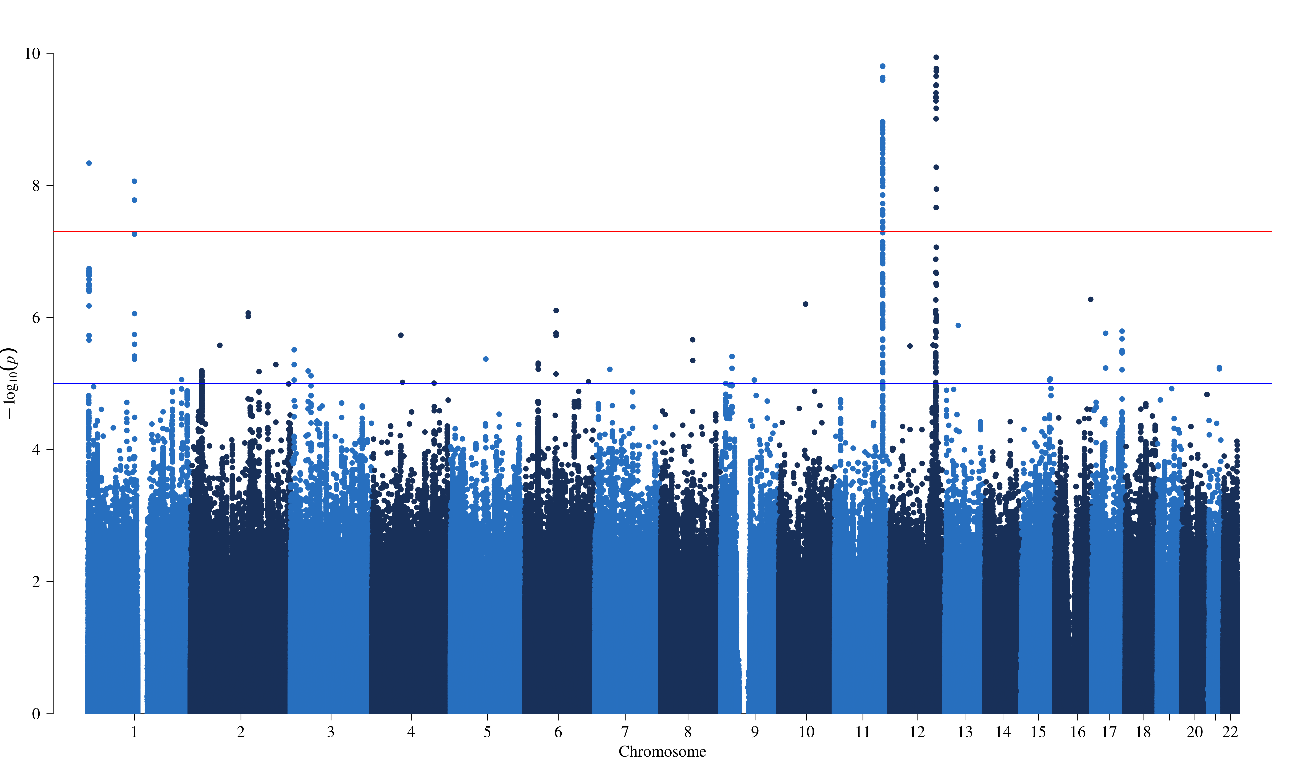


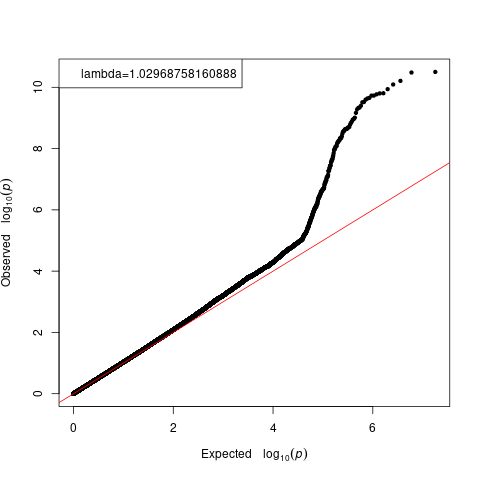


Hippocampus


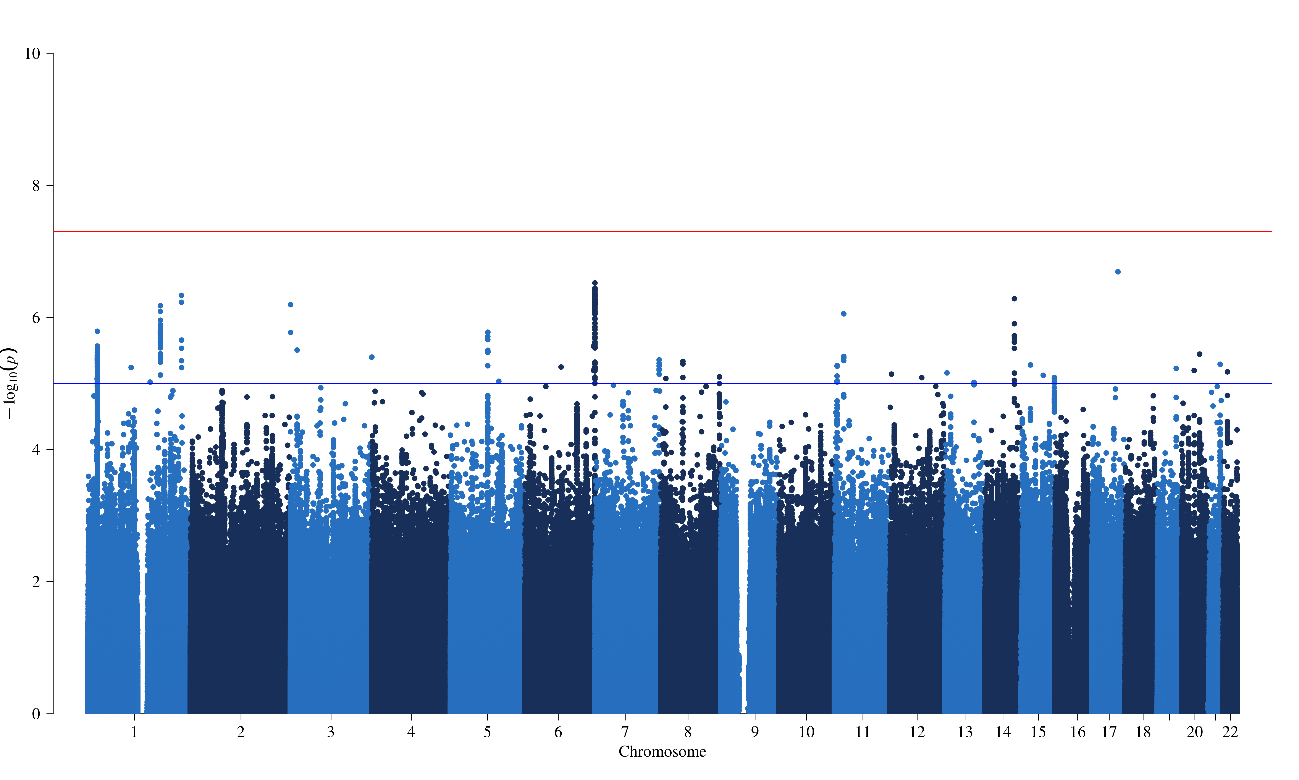


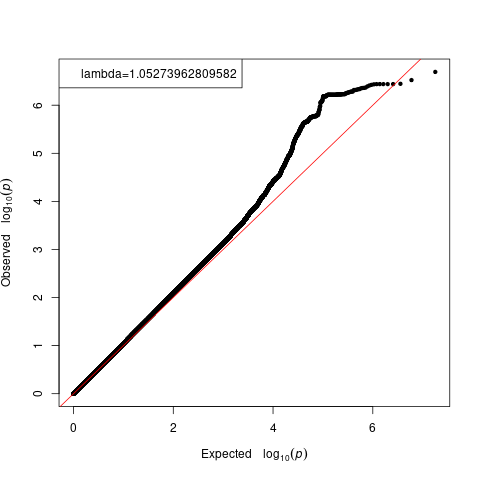


Pallidus


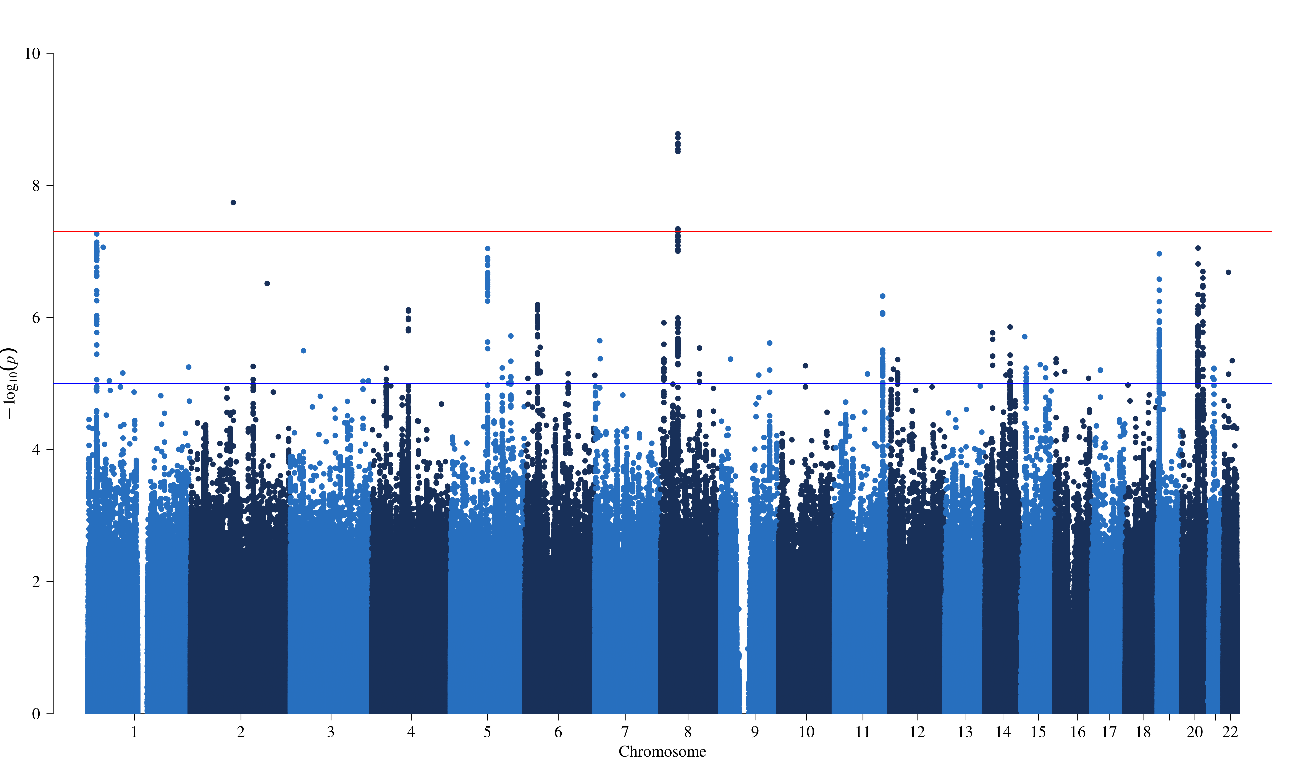


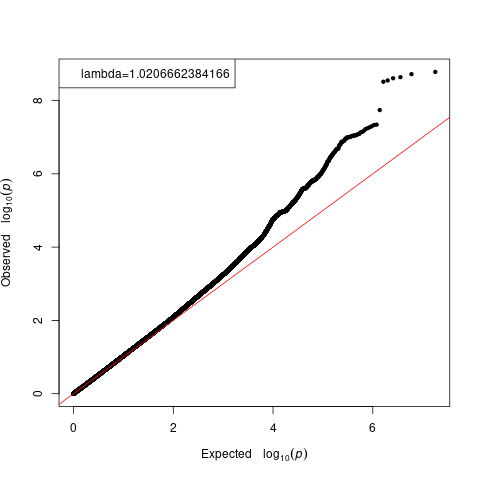


Putamen


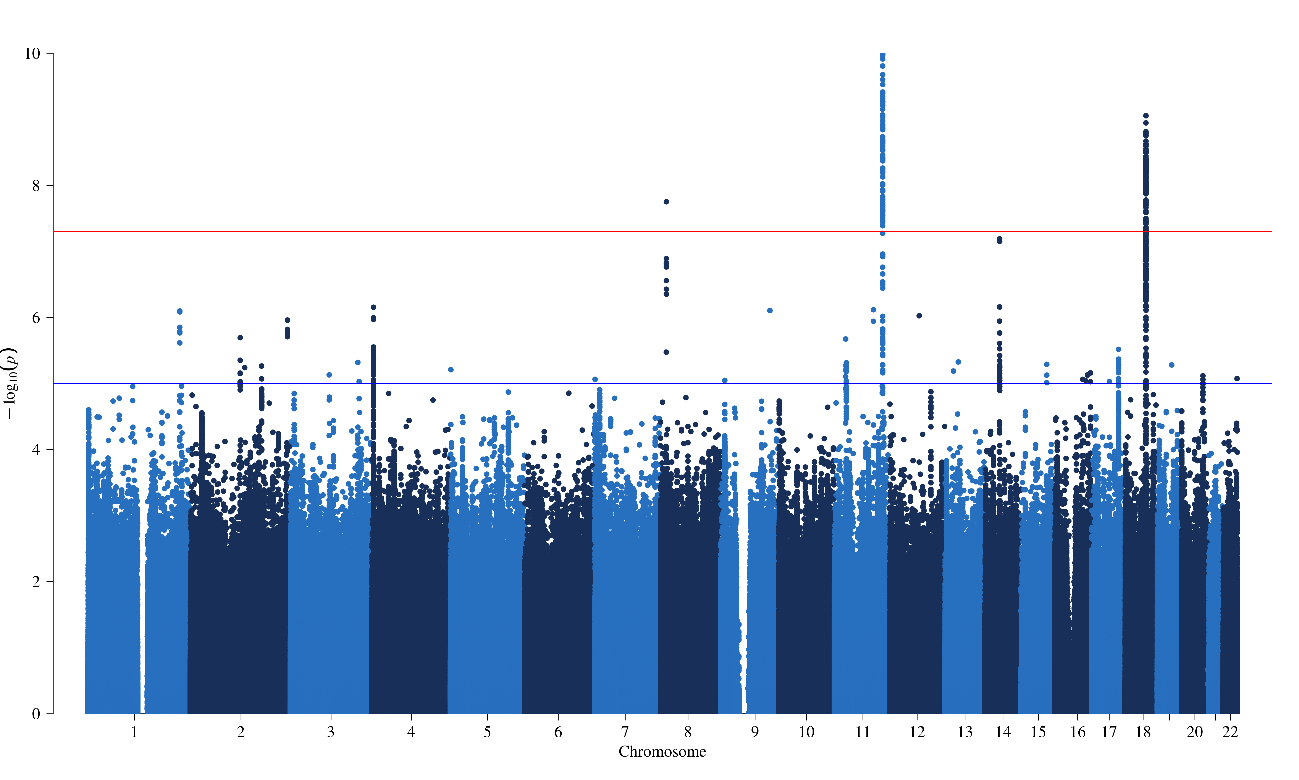


Although not shown in the plot, the top SNP on chromosome 14 (rs1959089, *p*-value = 1.27E-20) was genome-wide significant.


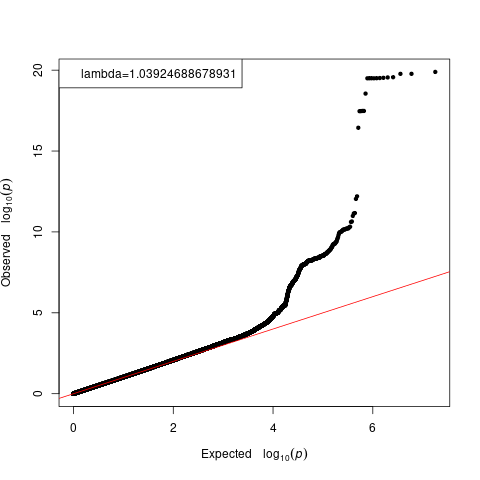


Thalamus


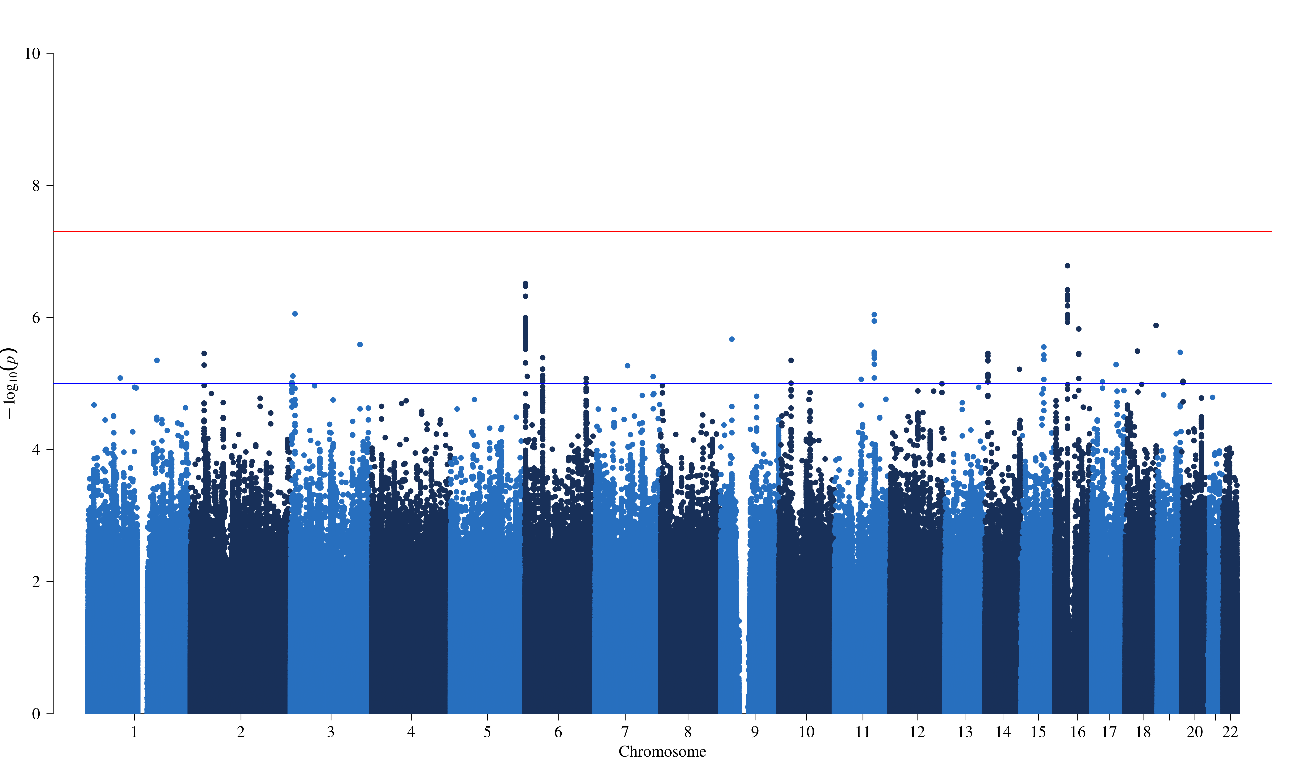


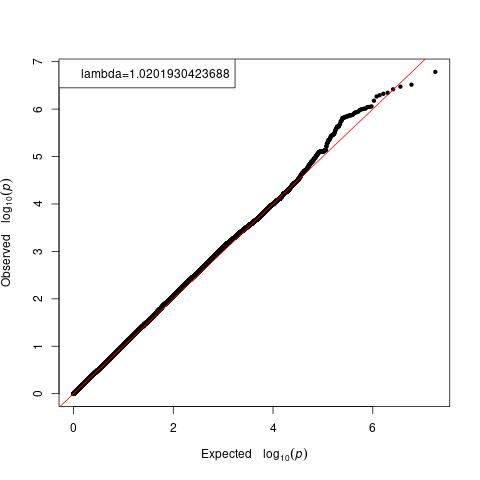


Brainstem


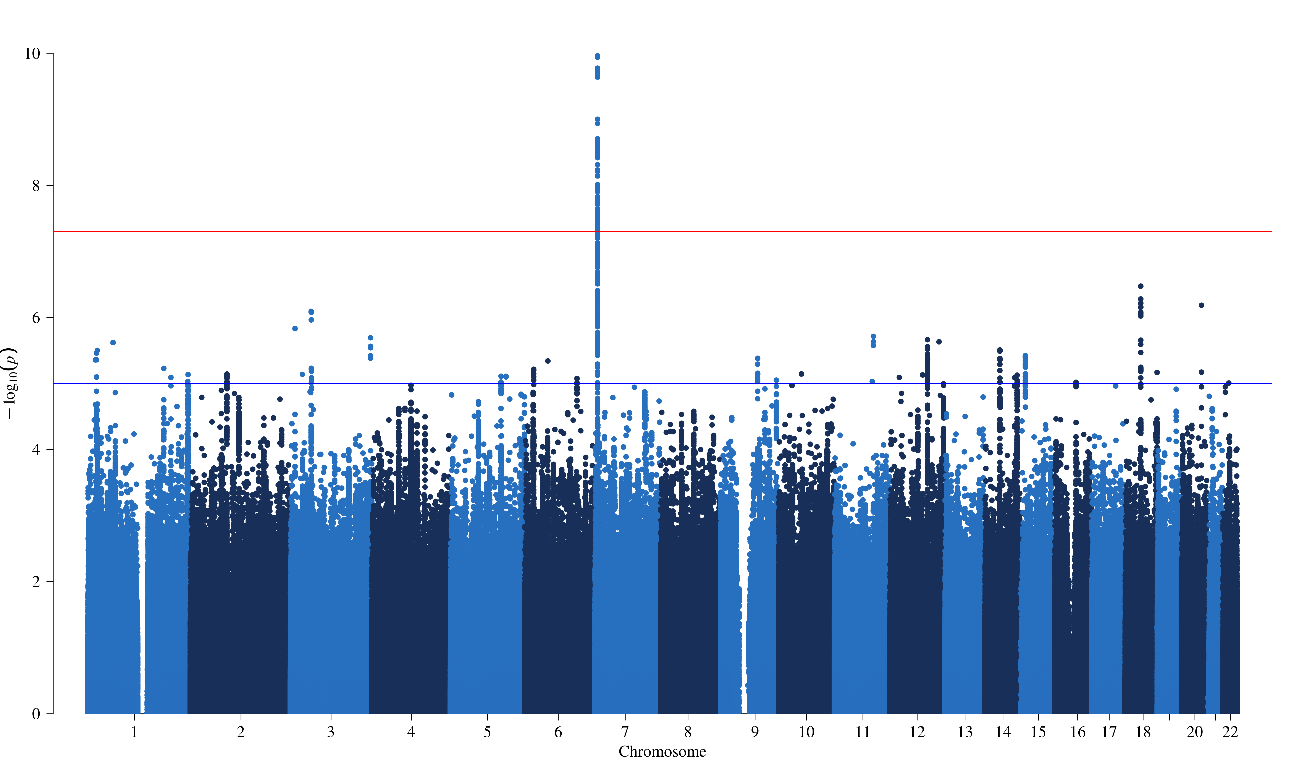


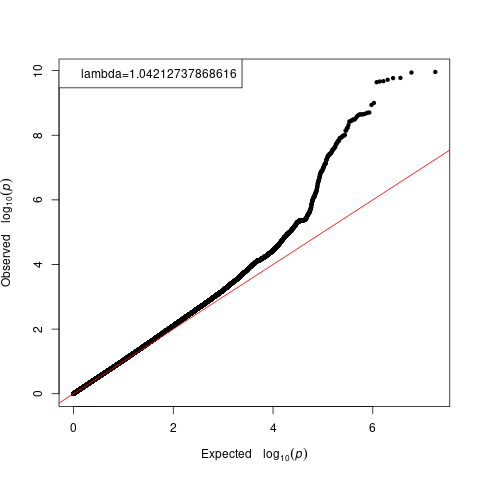


Figure S4. GENE2FUNC principal results for tissue expression in the combined meta-analysis. Tissue expression results on 53 specific tissue types by GTEx, with significantly enriched. Differentially expressed gene sets (*p*-value corrected < 0.05) highlighted in red (above). Heatmap of expression of genes present in LD region associated with each subcortical structure (below). The expression level of the genes is between 0 (blue) and 5.67 (red).

Brainstem


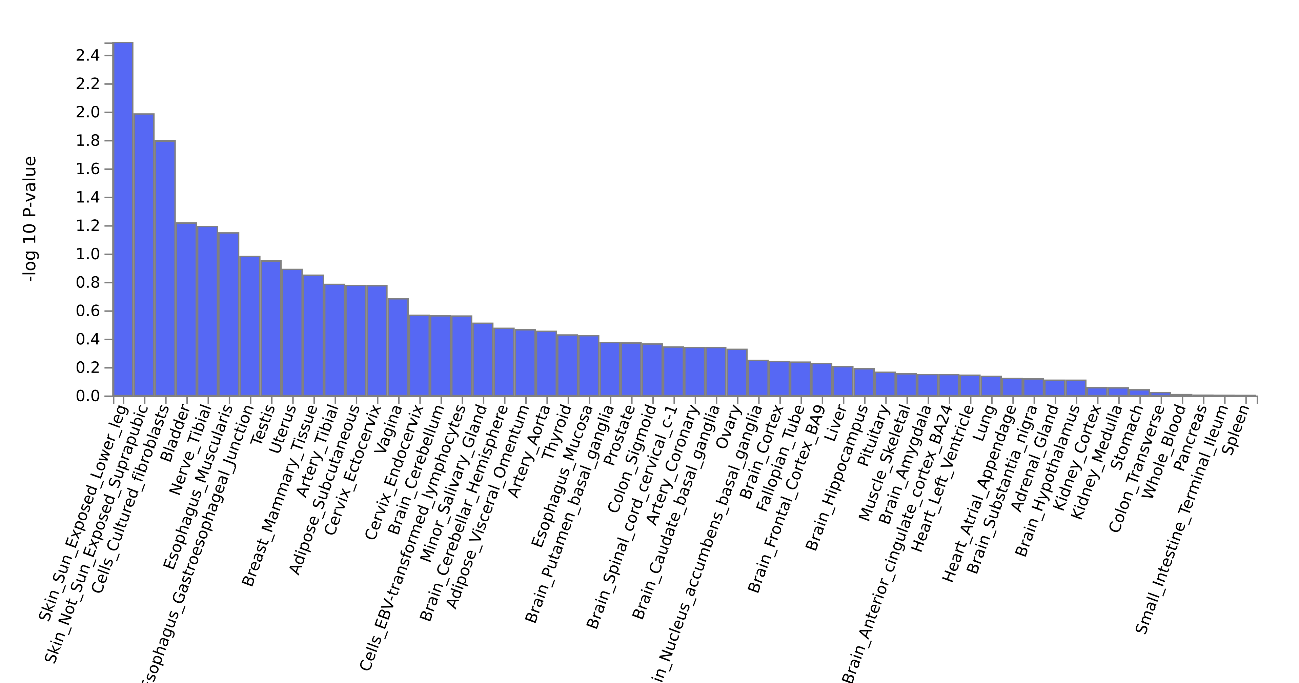


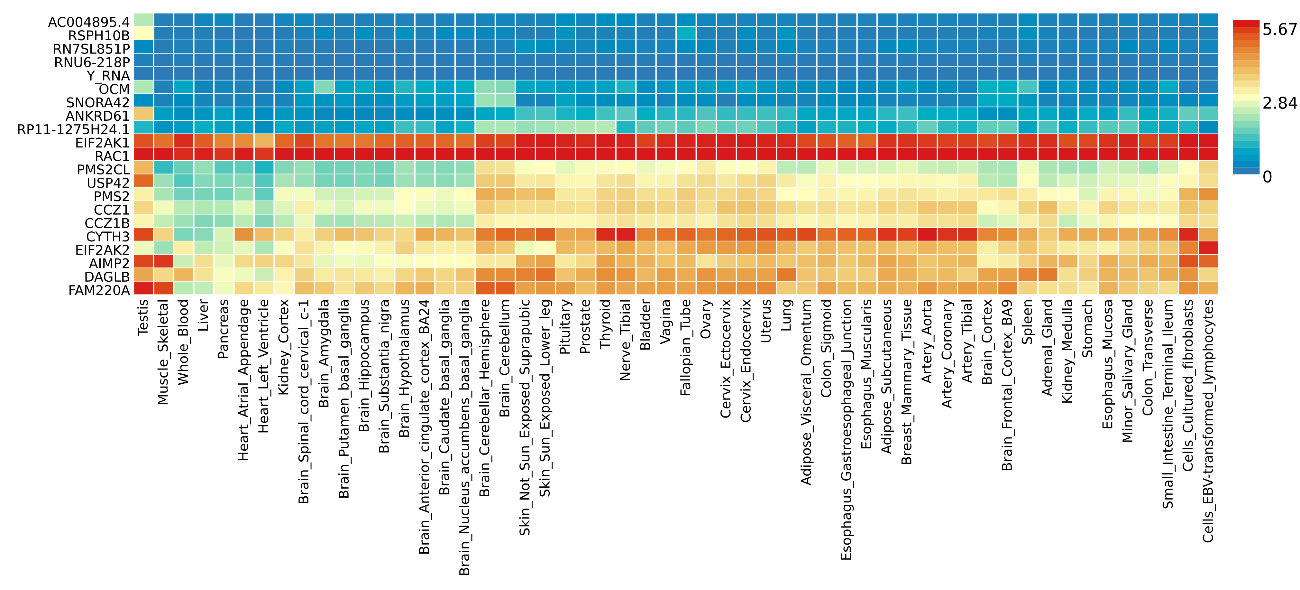


Caudate


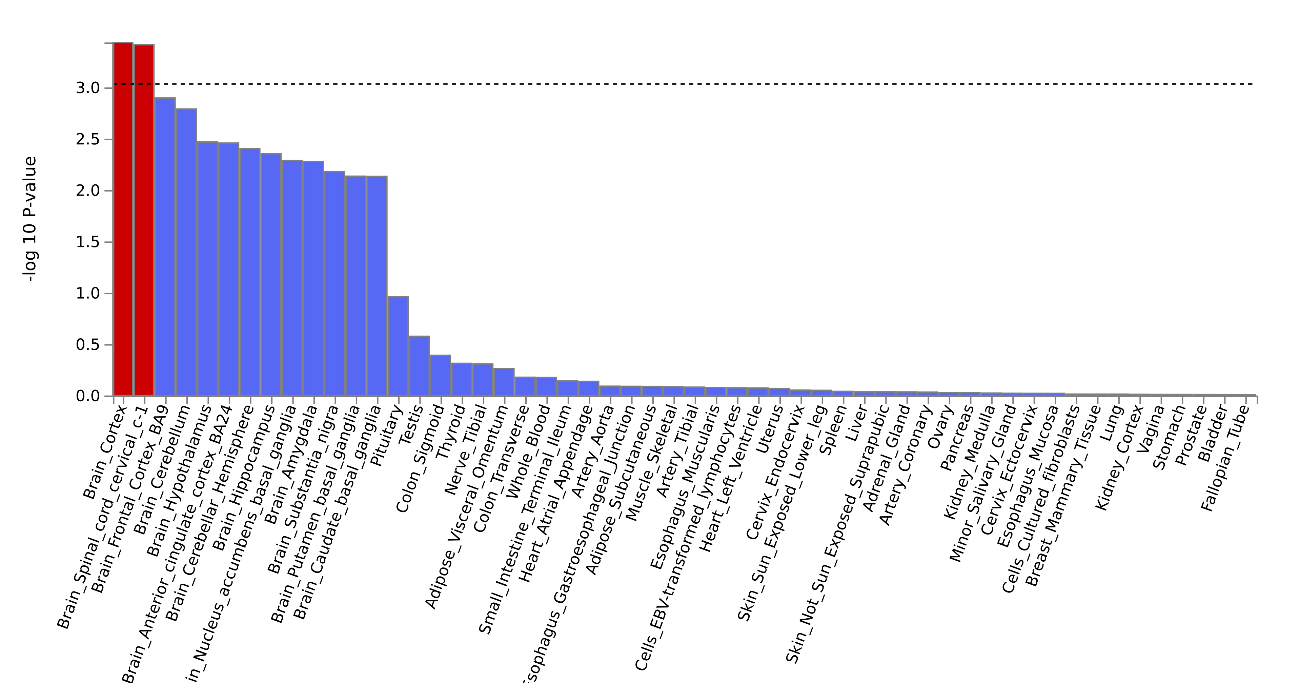


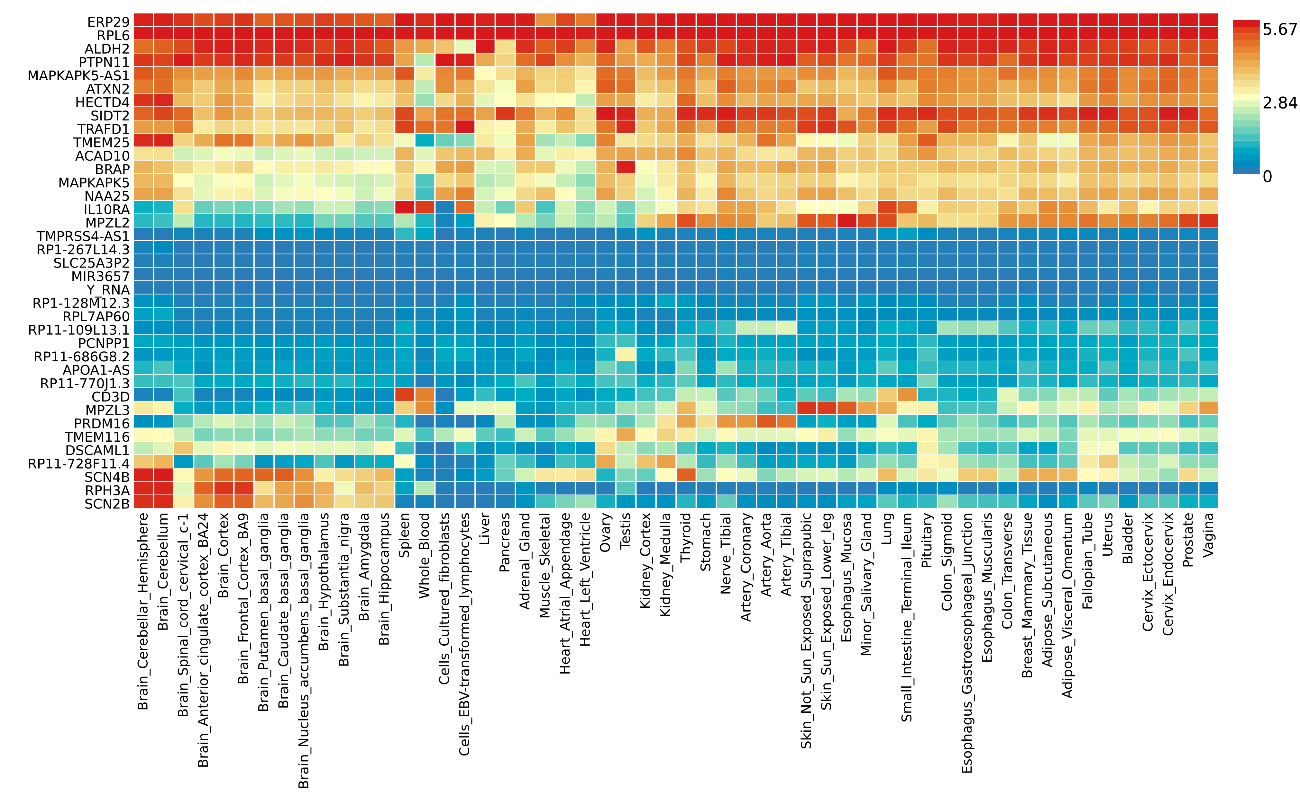


Pallidum


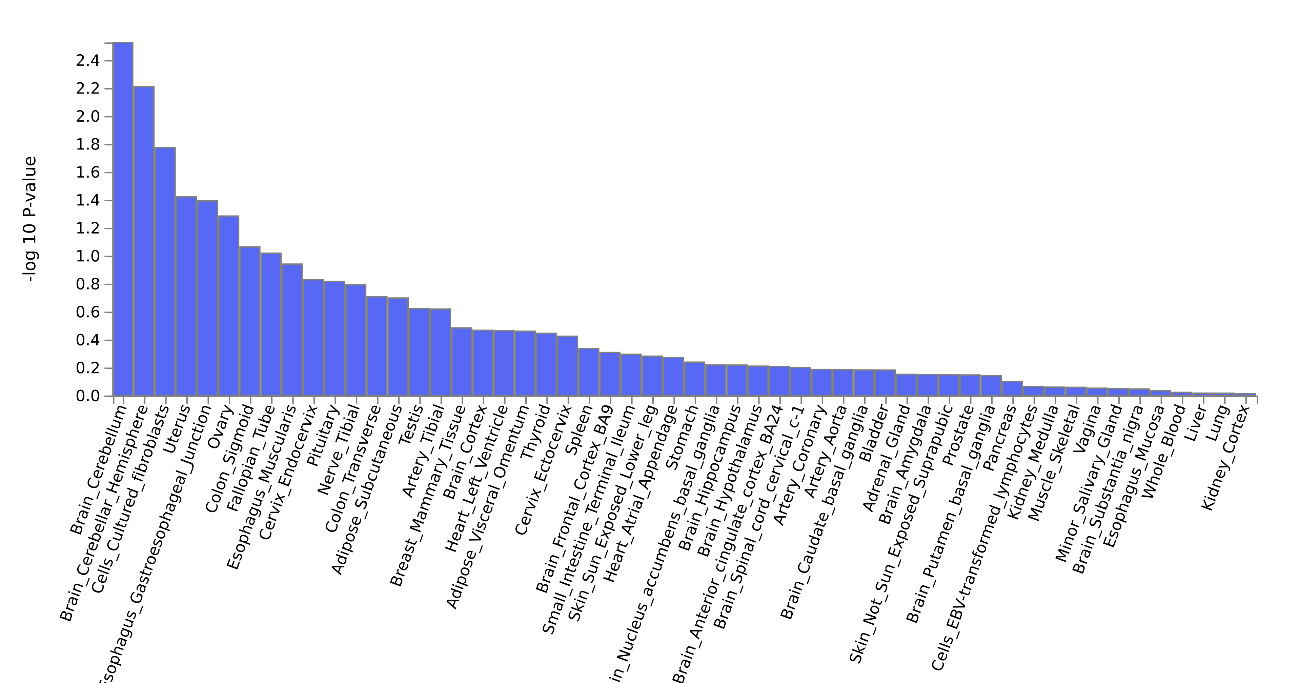


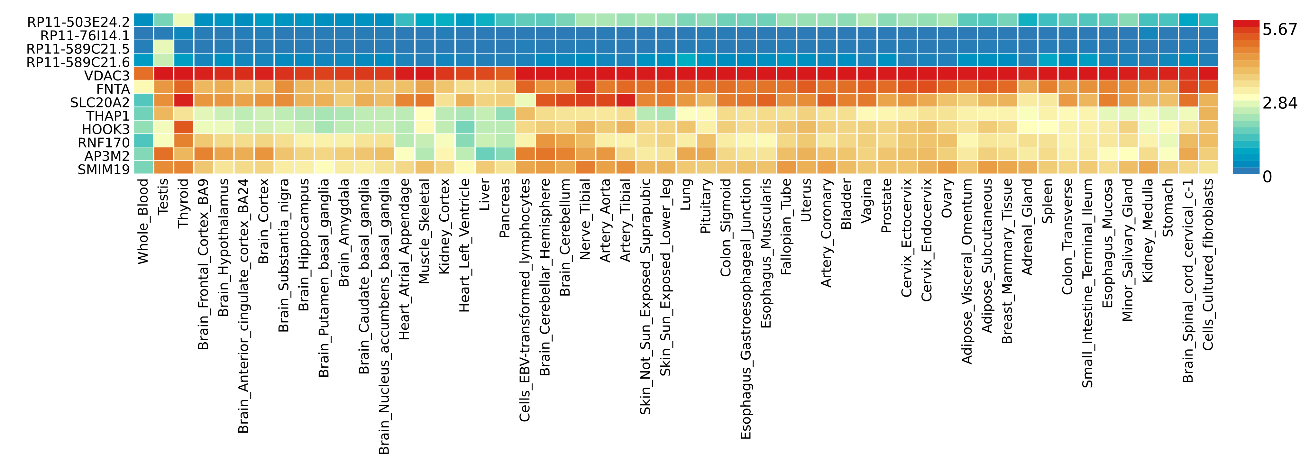


Putamen


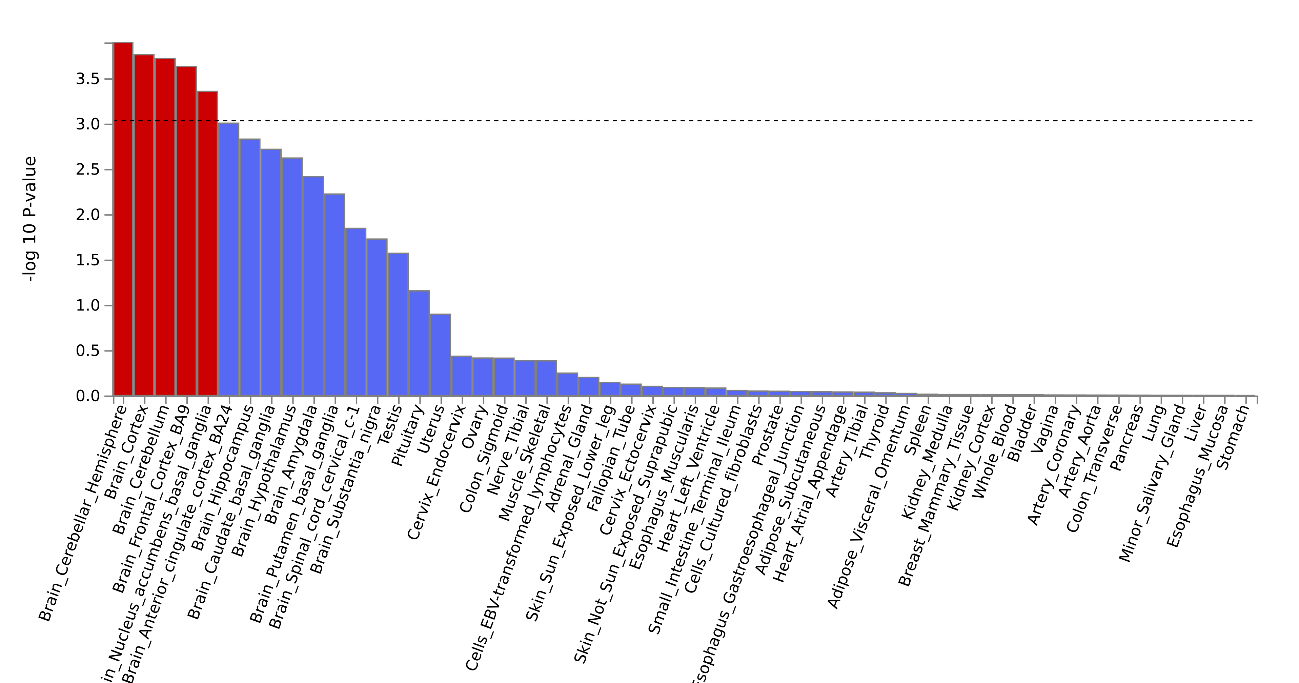


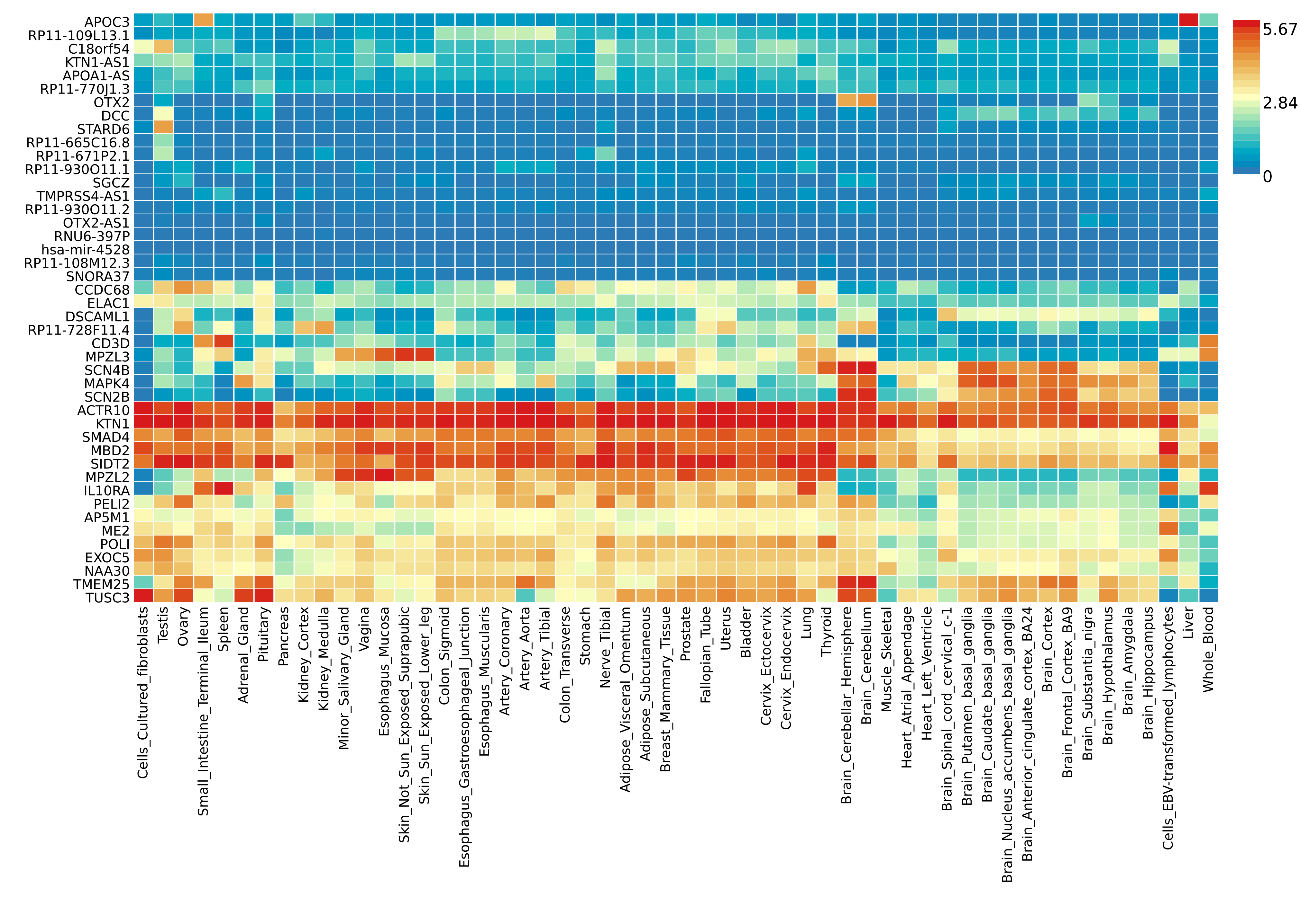

Supplement: Supplementary file 2 [file 4377e5236d573c7b6a09b0f1.docx]
