# Supplementary material for: Genome-wide Association Study of Subcortical Brain Structures in Japanese Ancestry: The Tohoku Medical Megabank Brain Magnetic Resonance Imaging Study
Source: Research Square preprint supplement (doi:10.21203/rs.3.rs-8692327/v1), 2026-02-12
Supplement: Supplementary file 1 [file 27d91adce28f05f551201e3f.xlsx]

## Sheet: S1
Supplementary Table 1. Annotation of all significant variants in the meta-analysis using SNP2GENE
Phenotype	rsID	Chromosome	Position	Non effect allele	Effect allele	MAF	p-value	r2	IndSigSNP	Genomic locus	Nearest gene	Distance	Function	CADD	RDB	minChrState	commonChrState	posMapFilt	eqtlMapFilt	ciMapFilt
Brainstem	rs74189692	7	6037723	T	G	0.3532	4.173e-08	0.724401	rs2302334	1	PMS2	0	intronic	3.71	6	4	5	1	1	0
Brainstem	rs4560	7	6063283	C	T	0.369	2.673e-08	0.966807	rs2302334	1	AIMP2:EIF2AK1	00:00:00	exonic	16.82	1f	4	4	1	1	0
Brainstem	rs17136307	7	6064799	C	T	0.3631	1.543e-08	0.991551	rs2302334	1	EIF2AK1	0	intronic	2.03	6	4	4	1	1	0
Brainstem	rs17343667	7	6065194	G	A	0.3631	1.542e-08	0.991551	rs2302334	1	EIF2AK1	0	intronic	7.358	1f	4	4	1	1	1
Brainstem	rs2640	7	6066450	T	C	0.3323	3.855e-09	0.98226	rs9640011	1	EIF2AK1	0	exonic	24.1	4	2	4	1	1	1
Brainstem	rs2639	7	6066461	T	C	0.4425	2.598e-10	0.752729	rs9640015	1	EIF2AK1	0	exonic	12.83	4	2	4	1	1	1
Brainstem	rs2240816	7	6066783	C	T	0.37	2.975e-08	0.971038	rs2302334	1	EIF2AK1	0	intronic	5.658	NA	2	4	1	1	1
Brainstem	rs10487932	7	6067019	A	C	0.4425	2.394e-10	0.752729	rs9640015	1	EIF2AK1	0	intronic	6.607	7	2	4	1	1	0
Brainstem	rs17136324	7	6067147	C	T	0.3284	1.39e-08	0.955923	rs9640011	1	EIF2AK1	0	intronic	1.223	7	2	4	1	1	0
Brainstem	rs10487933	7	6067243	T	C	0.4702	1.247e-10	0.667462	rs9640015	1	EIF2AK1	0	intronic	7.281	7	2	4	1	1	1
Brainstem	rs9640010	7	6069237	G	A	0.4474	1.915e-10	0.777081	rs9640015	1	EIF2AK1	0	intronic	2.321	6	4	4	1	1	0
Brainstem	rs66482438	7	6069653	G	C	0.4415	2.165e-10	0.748726	rs9640015	1	EIF2AK1	0	intronic	1.793	7	4	4	1	1	0
Brainstem	rs62456190	7	6070528	C	T	0.3641	2.003e-08	0.995776	rs2302334	1	EIF2AK1	0	intronic	8.784	7	4	4	1	1	0
Brainstem	rs10255418	7	6070856	C	T	0.4474	1.946e-10	0.777081	rs9640015	1	EIF2AK1	0	intronic	1.973	5	4	4	1	1	1
Brainstem	rs4724769	7	6071060	G	A	0.3641	1.988e-08	0.995776	rs2302334	1	EIF2AK1:ANKRD61	00:00:00	exonic	7.989	7	4	4	1	1	1
Brainstem	rs62456200	7	6073644	G	A	0.3631	2.684e-08	0.991551	rs2302334	1	EIF2AK1:ANKRD61	00:00:00	intronic	6.818	7	4	4	1	1	0
Brainstem	rs12672450	7	6074199	C	G	0.3641	2.383e-08	0.995776	rs2302334	1	EIF2AK1:ANKRD61	00:00:00	intronic	0.204	6	4	4	1	1	0
Brainstem	rs17136348	7	6074709	T	G	0.3393	2.89e-09	0.960121	rs9640011	1	EIF2AK1:ANKRD61	00:00:00	intronic	3.404	7	4	4	1	1	0
Brainstem	rs2302334	7	6075823	A	T	0.3631	1.166e-08	1	rs2302334	1	EIF2AK1:ANKRD61	00:00:00	exonic	16.72	6	4	4	1	1	0
Brainstem	rs113118485	7	6076199	GT	G	0.3571	5.426e-09	0.825842	rs9640011	1	EIF2AK1	0	intronic	1.651	NA	4	4	1	0	0
Brainstem	rs2302333	7	6077269	G	T	0.3611	2.789e-08	0.983103	rs2302334	1	EIF2AK1	0	intronic	12.43	NA	4	4	1	1	0
Brainstem	rs2302329	7	6078535	G	A	0.3393	2.394e-09	0.969062	rs9640011	1	EIF2AK1	0	intronic	1.62	NA	4	4	1	1	0
Brainstem	rs74199305	7	6079716	T	A	0.3343	1.082e-08	0.946674	rs9640011	1	EIF2AK1	0	intronic	4.547	6	4	4	1	0	0
Brainstem	rs62456202	7	6079951	C	T	0.3641	4.381e-08	0.995776	rs2302334	1	EIF2AK1	0	intronic	1.191	6	4	4	1	1	0
Brainstem	rs9640011	7	6081550	C	T	0.3343	1.113e-09	1	rs9640011	1	EIF2AK1	0	intronic	0.372	7	4	4	1	1	0
Brainstem	rs10447573	7	6083226	A	G	0.3393	2.209e-09	0.969062	rs9640011	1	EIF2AK1	0	intronic	2.653	7	4	4	1	1	0
Brainstem	rs9639021	7	6083596	G	A	0.2917	3.705e-09	0.819421	rs9640011	1	EIF2AK1	0	intronic	0.474	6	4	4	1	0	0
Brainstem	rs9640013	7	6083804	T	C	0.3333	3.643e-09	0.995547	rs9640011	1	EIF2AK1	0	intronic	0.296	7	4	4	1	1	0
Brainstem	rs76699236	7	6084980	G	T	0.3333	2.676e-09	0.995547	rs9640011	1	EIF2AK1	0	intronic	3.201	7	4	4	1	1	0
Brainstem	rs41282676	7	6086610	C	G	0.3393	2.524e-09	0.969062	rs9640011	1	EIF2AK1	0	intronic	0.604	5	4	4	1	1	0
Brainstem	rs57846353	7	6087389	C	A	0.3393	2.518e-09	0.969062	rs9640011	1	EIF2AK1:RN7SL851P	00:00:00	ncRNA_exonic	3.903	7	4	4	1	1	0
Brainstem	rs61227749	7	6087400	C	A	0.3393	3.216e-09	0.969062	rs9640011	1	EIF2AK1:RN7SL851P	00:00:00	ncRNA_exonic	3.542	6	4	4	1	1	0
Brainstem	rs3213665	7	6088420	A	G	0.3393	2.246e-09	0.969062	rs9640011	1	EIF2AK1	0	intronic	7.114	NA	4	4	1	1	0
Brainstem	rs118073675	7	6088898	G	A	0.3393	2.524e-09	0.969062	rs9640011	1	EIF2AK1	0	intronic	2.005	7	4	4	1	1	0
Brainstem	rs78429216	7	6089026	T	G	0.3383	2.464e-09	0.964592	rs9640011	1	EIF2AK1	0	intronic	6.917	7	4	4	1	1	0
Brainstem	rs551796	7	6089160	C	T	0.3621	3.037e-08	0.978974	rs2302334	1	EIF2AK1	0	intronic	0.185	NA	4	4	1	1	0
Brainstem	rs852154	7	6090727	C	T	0.3621	2.352e-08	0.978974	rs2302334	1	EIF2AK1	0	intronic	3.093	1f	3	5	1	1	0
Brainstem	rs74854273	7	6091735	G	A	0.3383	1.286e-09	0.964592	rs9640011	1	EIF2AK1	0	intronic	2.03	7	4	5	1	1	0
Brainstem	rs686680	7	6092365	G	A	0.3621	2.993e-08	0.978974	rs2302334	1	EIF2AK1	0	intronic	0.106	NA	4	5	1	1	0
Brainstem	rs685415	7	6092639	G	T	0.3621	3.668e-08	0.978974	rs2302334	1	EIF2AK1	0	intronic	5.964	NA	4	5	1	1	0
Brainstem	rs655692	7	6094701	C	T	0.3631	3.546e-08	0.974761	rs2302334	1	EIF2AK1	0	intronic	0.477	NA	4	5	1	1	0
Brainstem	rs852150	7	6095382	C	T	0.3036	4.509e-08	0.741428	rs2302334	1	EIF2AK1	0	intronic	0.395	NA	3	5	1	1	0
Brainstem	rs76480166	7	6097658	T	G	0.3393	3.604e-09	0.960245	rs9640011	1	EIF2AK1	0	intronic	6.338	3a	1	2	1	1	0
Brainstem	rs558030	7	6097667	T	A	0.3611	2.542e-08	0.96638	rs2302334	1	EIF2AK1	0	intronic	11.35	1f	1	2	1	1	0
Brainstem	rs581706	7	6098301	C	T	0.3611	3.843e-08	0.96638	rs2302334	1	EIF2AK1	0	intronic	7.81	1f	1	1	1	1	0
Brainstem	rs9640014	7	6099995	C	G	0.3403	6.768e-09	0.947368	rs9640011	1	EIF2AK1	1133	intergenic	2.906	7	5	15	1	1	0
Brainstem	rs646156	7	6101068	C	T	0.3611	4.587e-08	0.958055	rs2302334	1	EIF2AK1	2206	intergenic	0.294	NA	5	15	1	1	0
Brainstem	rs642987	7	6101800	G	C	0.3611	3.866e-08	0.958055	rs2302334	1	EIF2AK1	2938	intergenic	0.446	6	5	15	1	1	0
Brainstem	rs495124	7	6102034	A	G	0.3611	4.106e-08	0.958055	rs2302334	1	EIF2AK1	3172	intergenic	3.435	1f	5	15	1	1	0
Brainstem	rs631491	7	6102055	C	T	0.3601	4.443e-08	0.953986	rs2302334	1	EIF2AK1	3193	intergenic	5.046	NA	5	15	1	1	0
Brainstem	rs12155022	7	6102138	C	T	0.3373	7.881e-09	0.951219	rs9640011	1	EIF2AK1	3276	intergenic	6.053	6	5	15	1	1	0
Brainstem	rs12154418	7	6102462	G	C	0.3482	1.16e-08	0.898945	rs9640011	1	EIF2AK1	3600	intergenic	0.142	7	5	15	1	1	0
Brainstem	rs141317155	7	6102534	C	A	0.3482	6.451e-09	0.898945	rs9640011	1	EIF2AK1	3672	intergenic	1.111	7	5	15	1	1	0
Brainstem	rs629235	7	6102600	G	T	0.3611	3.631e-08	0.958055	rs2302334	1	EIF2AK1	3738	intergenic	2.273	NA	5	15	1	1	0
Brainstem	rs852138	7	6102951	C	A	0.3621	3.919e-08	0.954027	rs2302334	1	EIF2AK1	4089	intergenic	0.708	NA	7	15	1	1	0
Brainstem	rs144195973	7	6103870	C	T	0.3274	1.108e-08	0.934243	rs9640011	1	EIF2AK1	5008	intergenic	5.205	6	14	15	1	1	0
Brainstem	rs190506411	7	6105016	G	A	0.3175	1.317e-08	0.908743	rs9640011	1	EIF2AK1	6154	intergenic	1.866	7	14	15	1	1	0
Brainstem	NA	7	6107411	AT	ATT	0.3413	8.107e-09	0.826842	rs9640011	1	EIF2AK1	8549	intergenic	NA	NA	14	15	1	0	0
Brainstem	rs77533292	7	6108700	T	G	0.3433	1.132e-08	0.84453	rs9640011	1	EIF2AK1	9838	intergenic	1.321	6	14	15	1	1	0
Brainstem	rs79388869	7	6109233	G	A	0.3363	4.242e-09	0.878587	rs9640011	1	EIF2AK1	10371	intergenic	1.085	7	14	15	0	1	0
Brainstem	NA	7	6109540	TA	T	0.4266	3.683e-08	0.600697	rs9640011	1	EIF2AK1	10678	intergenic	0.554	NA	14	15	0	0	0
Brainstem	rs66692323	7	6110060	G	A	0.4107	1.897e-08	0.663886	rs9640011	1	AC004895.4	10673	intergenic	1.131	7	14	15	0	1	0
Brainstem	rs13225265	7	6111464	C	T	0.5	2.333e-10	0.652666	rs9640015	1	AC004895.4	9269	intergenic	2.566	5	5	15	1	1	0
Brainstem	rs138591112	7	6111711	G	A	0.3333	1.191e-08	0.899893	rs9640011	1	AC004895.4	9022	intergenic	2.438	7	5	15	1	1	0
Brainstem	rs75091449	7	6112124	C	T	0.3333	3.96e-09	0.899893	rs9640011	1	AC004895.4	8609	intergenic	3.122	7	5	15	1	1	0
Brainstem	rs12532865	7	6114185	G	A	0.3403	1.307e-08	0.862314	rs9640011	1	AC004895.4	6548	intergenic	7.5	5	5	15	1	1	0
Brainstem	rs76021892	7	6115010	T	G	0.3353	1.876e-08	0.899746	rs9640011	1	AC004895.4	5723	intergenic	2.628	6	5	15	1	1	0
Brainstem	rs80214846	7	6116937	C	G	0.3383	1.267e-08	0.79311	rs9640011	1	AC004895.4	3796	intergenic	2.132	4	1	15	1	1	0
Brainstem	rs9640015	7	6118924	C	G	0.4435	1.233e-10	1	rs9640015	1	AC004895.4	1809	intergenic	1.486	6	5	15	1	1	0
Caudate	rs2817145	1	3133422	T	A	0.4494	4.612e-09	1	rs2817145	1	PRDM16	0	intronic	3.705	4	2	15	1	0	0
Caudate	rs192840420	1	113310575	A	G	0.009921	1.114e-08	1	rs192840420	2	RP11-426L16.7	19477	intergenic	11.87	4	5	15	0	0	0
Caudate	rs540580122	1	113326483	GGAA	G	0.007937	2.179e-08	0.796774	rs192840420	2	RP11-426L16.7	35385	intergenic	9.789	NA	5	15	0	0	0
Caudate	rs6589612	11	117373055	C	G	0.2907	4.458e-08	0.845114	rs2276341	3	DSCAML1	0	intronic	1.803	5	4	15	1	0	1
Caudate	rs7932097	11	117373125	C	T	0.2927	1.421e-08	0.83856	rs2276341	3	DSCAML1	0	intronic	5.898	5	4	15	1	0	1
Caudate	rs7112940	11	117373432	A	G	0.2907	4.307e-08	0.845114	rs2276341	3	DSCAML1	0	intronic	0.499	2b	4	15	1	0	1
Caudate	rs4938394	11	117373947	T	C	0.2808	3.661e-08	0.896923	rs2276341	3	DSCAML1	0	intronic	5.371	5	4	15	1	0	1
Caudate	rs3216152	11	117375415	GA	G	0.2292	3.495e-08	0.79735	rs2276341	3	DSCAML1	0	intronic	4.512	NA	4	15	1	1	0
Caudate	rs2276341	11	117375461	G	A	0.2639	6.481e-09	1	rs2276341	3	DSCAML1	0	intronic	7.255	5	4	15	1	0	0
Caudate	rs10892132	11	117375951	G	A	0.2808	2.348e-08	0.91718	rs2276341	3	DSCAML1	0	intronic	4.473	7	4	15	1	0	1
Caudate	rs386362668	11	117377436	A	AT	0.2698	6.811e-09	0.969938	rs2276341	3	DSCAML1	0	intronic	0.825	NA	5	15	1	0	0
Caudate	rs2155394	11	117378116	G	A	0.2698	1.035e-08	0.969938	rs2276341	3	DSCAML1	0	intronic	3.414	NA	5	15	1	0	0
Caudate	rs10750107	11	117379086	T	C	0.2728	2.373e-08	0.955585	rs2276341	3	DSCAML1	0	intronic	4.366	5	5	15	1	0	0
Caudate	rs2840350	11	117380850	C	T	0.2718	8.428e-09	0.960446	rs2276341	3	DSCAML1	0	intronic	0.313	NA	5	15	1	0	1
Caudate	rs5795090	11	117381181	C	CCAT	0.2728	2.664e-08	0.946075	rs2276341	3	DSCAML1	0	intronic	1.816	NA	5	15	1	0	0
Caudate	rs4938397	11	117392337	G	T	0.381	9.129e-09	0.736485	rs2510853	3	DSCAML1	0	intronic	0.677	2b	4	15	1	0	0
Caudate	rs34512794	11	117392477	CG	C	0.378	8.289e-09	0.725061	rs2510853	3	DSCAML1	0	intronic	1.49	NA	4	15	1	1	1
Caudate	rs10892135	11	117392826	G	A	0.381	6.077e-09	0.736485	rs2510853	3	DSCAML1	0	intronic	2.589	5	4	15	1	0	0
Caudate	rs1940039	11	117393102	C	T	0.381	5.449e-09	0.736485	rs2510853	3	DSCAML1	0	intronic	1.024	5	4	15	1	0	0
Caudate	rs12224853	11	117394822	C	T	0.38	2.368e-09	0.74076	rs2510853	3	DSCAML1	0	intronic	0.129	5	4	15	1	1	0
Caudate	rs2276339	11	117395481	G	A	0.38	2.316e-09	0.74076	rs2510853	3	DSCAML1	0	intronic	0.995	NA	4	15	1	0	1
Caudate	rs12800264	11	117396269	G	A	0.38	1.328e-09	0.74076	rs2510853	3	DSCAML1	0	intronic	0.978	7	4	15	1	1	0
Caudate	rs12800487	11	117396386	G	A	0.38	1.491e-09	0.74076	rs2510853	3	DSCAML1	0	intronic	1.211	7	4	15	1	1	0
Caudate	rs11605509	11	117396433	T	C	0.38	1.163e-09	0.74076	rs2510853	3	DSCAML1	0	intronic	1.42	6	4	15	1	1	0
Caudate	rs11603366	11	117396505	G	T	0.38	2.011e-09	0.74076	rs2510853	3	DSCAML1	0	intronic	0.166	5	4	15	1	1	0
Caudate	rs11603340	11	117396527	C	G	0.38	2.768e-09	0.74076	rs2510853	3	DSCAML1	0	intronic	2.069	5	4	15	1	1	0
Caudate	rs1941390	11	117396991	G	A	0.38	2.099e-09	0.74076	rs2510853	3	DSCAML1	0	intronic	0.482	NA	4	15	1	1	0
Caudate	rs7940527	11	117398202	G	C	0.4058	1.665e-09	0.674812	rs623052	3	DSCAML1	0	intronic	4.075	5	5	15	1	1	0
Caudate	rs4936384	11	117398591	C	T	0.378	2.426e-09	0.755529	rs2510853	3	DSCAML1	0	intronic	1.541	5	5	15	1	1	1
Caudate	rs4938400	11	117399604	C	A	0.252	2.858e-08	0.994966	rs4938401	3	DSCAML1	0	intronic	3.728	2b	5	14	1	1	0
Caudate	rs4938401	11	117399605	T	G	0.253	1.917e-08	1	rs4938401	3	DSCAML1	0	intronic	0.592	2b	5	14	1	1	0
Caudate	rs4938402	11	117399918	G	A	0.2788	3.75e-08	0.882878	rs4938401	3	DSCAML1	0	intronic	0.398	6	5	14	1	1	0
Caudate	rs521609	11	117407301	G	A	0.374	3.319e-09	0.847592	rs2510853	3	DSCAML1	0	intronic	4.189	5	2	15	1	1	0
Caudate	rs142945810	11	117407847	ACTCATAGGGACATATGGT	A	0.4871	6.359e-11	0.866197	rs623052	3	DSCAML1	0	intronic	9.01	NA	5	15	1	0	0
Caudate	rs473343	11	117408156	G	C	0.4554	5.791e-09	0.784418	rs623052	3	DSCAML1	0	intronic	2.199	5	5	15	1	1	0
Caudate	rs661631	11	117408179	C	T	0.4921	2.398e-10	0.849874	rs623052	3	DSCAML1	0	intronic	0.159	NA	5	15	1	1	0
Caudate	rs2509005	11	117410428	G	A	0.4861	2.629e-10	0.869371	rs623052	3	DSCAML1	0	intronic	2.255	7	5	15	1	1	0
Caudate	rs2509006	11	117410507	C	T	0.4861	1.615e-10	0.869371	rs623052	3	DSCAML1	0	intronic	1.593	5	5	15	1	0	0
Caudate	rs2510853	11	117410682	G	A	0.4137	1.146e-09	1	rs2510853	3	DSCAML1	0	intronic	2.322	5	5	15	1	1	0
Caudate	rs2509007	11	117410700	G	A	0.4861	1.64e-10	0.869371	rs623052	3	DSCAML1	0	intronic	5.16	5	5	15	1	0	0
Caudate	rs636530	11	117421858	A	G	0.4494	4.005e-09	0.813381	rs623052	3	DSCAML1	0	intronic	5.243	7	5	15	1	1	0
Caudate	rs599411	11	117422262	T	G	0.4831	2.659e-09	0.685095	rs623052	3	DSCAML1	0	intronic	5.658	5	5	15	1	1	0
Caudate	rs579239	11	117425009	T	C	0.4504	1.053e-08	0.830198	rs623052	3	DSCAML1	0	intronic	0.746	6	5	15	1	1	0
Caudate	rs562422	11	117428278	G	A	0.4365	4.648e-09	0.882835	rs623052	3	DSCAML1	0	intronic	2.587	NA	5	15	1	1	0
Caudate	rs685440	11	117429718	G	T	0.3631	2.894e-09	0.768104	rs2510853	3	DSCAML1	0	intronic	1.145	NA	5	15	1	1	0
Caudate	rs685425	11	117429728	C	T	0.3601	4.578e-09	0.781003	rs2510853	3	DSCAML1	0	intronic	2.944	NA	5	15	1	1	0
Caudate	NA	11	117429845	A	AACG	0.3671	2.319e-09	0.758155	rs2510853	3	DSCAML1	0	intronic	0.307	NA	5	15	1	0	0
Caudate	NA	11	117430841	A	G	0.4018	3.358e-11	0.890624	rs2510853	3	DSCAML1	0	intronic	4.225	NA	5	15	1	1	0
Caudate	rs623052	11	117431045	G	A	0.4673	3.18e-11	1	rs623052	3	DSCAML1	0	intronic	1.75	NA	5	15	1	1	0
Caudate	rs685916	11	117434215	G	A	0.3502	2.146e-09	0.701758	rs2510853	3	DSCAML1	0	intronic	1.133	7	5	15	1	0	0
Caudate	rs3782886	12	112110489	T	C	0.1746	5.191e-10	0.811905	NA	4	BRAP	0	exonic	18.03	NA	4	4	1	0	1
Caudate	rs11066001	12	112119171	T	C	0.1726	4.413e-10	0.799533	NA	4	BRAP	0	intronic	4.172	6	4	4	1	0	0
Caudate	rs11066015	12	112168009	G	A	0.1756	3.849e-10	0.797538	NA	4	ACAD10	0	intronic	1.509	5	4	4	1	0	0
Caudate	rs4646776	12	112230019	G	C	0.1736	3.002e-10	0.805702	NA	4	ALDH2	0	intronic	0.762	2b	3	4	1	0	1
Caudate	rs671	12	112241766	G	A	0.1736	4.595e-10	0.805702	NA	4	ALDH2	0	exonic	34	5	4	4	1	0	0
Caudate	rs78069066	12	112337924	G	A	0.1756	9.7e-10	0.818141	NA	4	ADAM1A	0	ncRNA_exonic	15.9	5	4	5	1	0	0
Caudate	rs11066132	12	112468206	C	T	0.1716	2.136e-10	0.793398	NA	4	NAA25	0	intronic	12.4	6	4	4	1	0	0
Caudate	rs116873087	12	112511913	G	C	0.1766	2.924e-10	0.802128	NA	4	NAA25	0	intronic	0.563	7	4	4	1	0	0
Caudate	rs78981331	12	112533774	C	T	0.1052	1.96e-08	0.692237	rs2074356	4	NAA25	0	intronic	0.5	5	1	5	1	0	0
Caudate	rs12231737	12	112574616	C	T	0.1835	6.657e-10	0.785036	NA	4	TRAFD1	0	intronic	2.52	5	4	4	1	0	0
Caudate	rs2074356	12	112645401	G	A	0.129	1.075e-10	1	rs2074356	4	HECTD4	0	intronic	1.634	NA	4	4	1	0	0
Caudate	rs369008737	12	112663996	T	TACACACAC	0.128	5.228e-09	1	rs369008737	4	HECTD4	0	NA	1.348	NA	4	4	1	0	0
Caudate	rs77768175	12	112736118	A	G	0.1607	1.779e-10	0.729815	NA	4	HECTD4	0	intronic	10.56	7	4	5	1	0	0
Caudate	rs11066280	12	112817783	T	A	0.2163	7.933e-11	1	rs11066280	4	HECTD4	0	intronic	8.731	5	1	15	1	0	0
Caudate	NA	12	112906873	C	CA	0.1726	1.816e-10	1	NA	4	PTPN11	0	intronic	0.585	NA	4	5	1	0	0
Caudate	rs11066325	12	112930475	T	C	0.1796	1.636e-10	0.699935	NA	4	PTPN11	0	intronic	0.419	6	4	5	1	0	0
Caudate	rs77753011	12	113117897	G	T	0.1597	1.154e-08	0.671453	NA	4	RPH3A	0	intronic	0.213	5	5	14	1	0	0
Pallidum	rs75978865	2	104605213	A	G	0.02778	2.062e-08	1	rs75978865	1	RP11-76I14.1	0	ncRNA_intronic	5.937	6	15	15	1	0	0
Pallidum	rs2923447	8	42439848	G	T	0.4643	2.334e-09	0.984943	rs2974300	2	RP11-503E24.3	29511	intergenic	1.128	NA	5	15	0	1	0
Pallidum	rs2974300	8	42440532	C	T	0.4603	1.678e-09	1	rs2974300	2	RP11-503E24.3	30195	intergenic	10.67	5	5	15	0	1	0
Pallidum	rs2923402	8	42445400	G	A	0.4603	2.9e-09	1	rs2974300	2	RP11-503E24.3	35063	intergenic	1.589	6	5	15	0	1	0
Pallidum	rs2923403	8	42447748	G	T	0.4593	3.145e-09	0.996174	rs2974300	2	RP11-503E24.3	37411	intergenic	0.243	6	1	15	0	1	0
Pallidum	rs2923404	8	42447780	T	G	0.09226	2.516e-09	1	rs2923404	2	RP11-503E24.3	37443	intergenic	2.537	6	1	15	0	1	0
Pallidum	rs2923405	8	42448126	T	G	0.4603	1.935e-09	1	rs2974300	2	RP11-503E24.3	37789	intergenic	2.196	1f	5	15	0	1	0
Pallidum	rs2923411	8	42455206	T	C	0.4206	4.599e-08	0.842686	rs2974300	2	RP11-503E24.3	44869	intergenic	2.763	1f	5	15	0	1	0
Pallidum	rs10109400	8	42455353	T	C	0.4206	4.716e-08	0.842686	rs2974300	2	RP11-503E24.3	45016	intergenic	1.932	1f	5	15	0	1	0
Putamen	rs13267830	8	14341225	G	A	0.1181	1.74e-08	1	rs13267830	1	SGCZ	0	intronic	6.755	7	5	15	1	0	0
Putamen	rs4096589	11	117363891	A	T	0.253	3.493e-09	0.883758	rs2276341	2	DSCAML1	0	intronic	1.339	5	5	14	1	0	1
Putamen	rs1940038	11	117364120	C	T	0.254	6.459e-09	0.888508	rs2276341	2	DSCAML1	0	intronic	1.3	NA	5	14	1	0	0
Putamen	rs6589610	11	117372097	T	C	0.3621	2.81e-08	0.954035	rs10790191	2	DSCAML1	0	intronic	0.796	5	4	15	1	1	1
Putamen	rs6589611	11	117372126	T	A	0.3621	2.49e-08	0.954035	rs10790191	2	DSCAML1	0	intronic	1.885	5	4	15	1	1	1
Putamen	rs10790191	11	117372548	A	G	0.374	3.593e-08	1	rs10790191	2	DSCAML1	0	intronic	0.364	5	4	15	1	1	0
Putamen	rs6589612	11	117373055	C	G	0.2907	2.036e-09	0.845114	rs2276341	2	DSCAML1	0	intronic	1.803	5	4	15	1	0	1
Putamen	rs7932097	11	117373125	C	T	0.2927	1.352e-09	0.83856	rs2276341	2	DSCAML1	0	intronic	5.898	5	4	15	1	0	1
Putamen	rs7112940	11	117373432	A	G	0.2907	1.265e-09	0.845114	rs2276341	2	DSCAML1	0	intronic	0.499	2b	4	15	1	0	1
Putamen	rs4938394	11	117373947	T	C	0.2808	1.055e-09	0.896923	rs2276341	2	DSCAML1	0	intronic	5.371	5	4	15	1	0	1
Putamen	rs3216152	11	117375415	GA	G	0.2292	5.662e-09	0.79735	rs2276341	2	DSCAML1	0	intronic	4.512	NA	4	15	1	1	0
Putamen	rs2276341	11	117375461	G	A	0.2639	1.551e-10	1	rs2276341	2	DSCAML1	0	intronic	7.255	5	4	15	1	0	0
Putamen	rs2276343	11	117375596	G	A	0.2331	1.168e-08	0.777344	rs2276341	2	DSCAML1	0	intronic	0.012	5	4	15	1	1	0
Putamen	rs10892132	11	117375951	G	A	0.2808	6.053e-10	0.91718	rs2276341	2	DSCAML1	0	intronic	4.473	7	4	15	1	0	1
Putamen	rs386362668	11	117377436	A	AT	0.2698	2.506e-10	0.969938	rs2276341	2	DSCAML1	0	intronic	0.825	NA	5	15	1	0	0
Putamen	rs2155394	11	117378116	G	A	0.2698	7.018e-10	0.969938	rs2276341	2	DSCAML1	0	intronic	3.414	NA	5	15	1	0	0
Putamen	rs10750107	11	117379086	T	C	0.2728	5.571e-10	0.955585	rs2276341	2	DSCAML1	0	intronic	4.366	5	5	15	1	0	0
Putamen	rs4936383	11	117380108	A	G	0.3681	9.876e-09	0.930953	rs10790191	2	DSCAML1	0	intronic	7.461	5	5	15	1	1	1
Putamen	rs2840350	11	117380850	C	T	0.2718	8.555e-10	0.960446	rs2276341	2	DSCAML1	0	intronic	0.313	NA	5	15	1	0	1
Putamen	rs5795090	11	117381181	C	CCAT	0.2728	1.436e-09	0.946075	rs2276341	2	DSCAML1	0	intronic	1.816	NA	5	15	1	0	0
Putamen	rs35200015	11	117383215	G	A	0.2401	2.279e-09	0.849061	rs4938401	2	DSCAML1	0	intronic	0.763	3a	2	7	1	0	1
Putamen	rs10892133	11	117383694	C	T	0.2361	9.277e-10	0.840068	rs4938401	2	DSCAML1	0	intronic	15.3	4	2	15	1	1	1
Putamen	rs4938395	11	117384673	A	G	0.2411	4.787e-11	0.854816	rs4938401	2	DSCAML1	0	intronic	2.334	5	5	15	1	1	1
Putamen	rs2186762	11	117386067	A	C	0.3929	2.796e-08	1	rs2186762	2	DSCAML1	0	intronic	0.59	5	4	15	1	0	0
Putamen	rs3819210	11	117389517	A	G	0.245	1.034e-11	0.902635	rs4938401	2	DSCAML1	0	intronic	6.565	NA	4	15	1	0	0
Putamen	rs11216436	11	117391374	G	A	0.251	8.353e-11	0.979939	rs4938401	2	DSCAML1	0	intronic	0.035	7	4	15	1	1	0
Putamen	rs7936795	11	117391736	A	G	0.254	9.225e-11	0.985162	rs4938401	2	DSCAML1	0	intronic	1.468	5	4	15	1	1	1
Putamen	rs2276340	11	117391966	G	A	0.253	1.012e-10	0.989999	rs4938401	2	DSCAML1	0	exonic	11.78	NA	4	15	1	1	1
Putamen	rs4938397	11	117392337	G	T	0.381	4.204e-08	0.749842	NA	2	DSCAML1	0	intronic	0.677	2b	4	15	1	0	0
Putamen	rs34512794	11	117392477	CG	C	0.378	1.709e-08	0.73832	NA	2	DSCAML1	0	intronic	1.49	NA	4	15	1	1	1
Putamen	rs10892135	11	117392826	G	A	0.381	2.242e-08	0.749842	NA	2	DSCAML1	0	intronic	2.589	5	4	15	1	0	0
Putamen	rs1940039	11	117393102	C	T	0.381	2.475e-08	0.749842	NA	2	DSCAML1	0	intronic	1.024	5	4	15	1	0	0
Putamen	rs1940040	11	117393294	G	C	0.253	1.081e-10	0.989999	rs4938401	2	DSCAML1	0	intronic	6.234	5	4	15	1	1	0
Putamen	rs11216437	11	117394685	G	A	0.253	6.101e-11	0.989999	rs4938401	2	DSCAML1	0	intronic	0.085	5	4	15	1	1	0
Putamen	rs12224853	11	117394822	C	T	0.38	1.874e-08	0.753883	NA	2	DSCAML1	0	intronic	0.129	5	4	15	1	1	0
Putamen	rs2276339	11	117395481	G	A	0.38	2.107e-08	0.753883	NA	2	DSCAML1	0	intronic	0.995	NA	4	15	1	0	1
Putamen	rs12800264	11	117396269	G	A	0.38	1.507e-08	0.753883	NA	2	DSCAML1	0	intronic	0.978	7	4	15	1	1	0
Putamen	rs12800487	11	117396386	G	A	0.38	2.082e-08	0.753883	NA	2	DSCAML1	0	intronic	1.211	7	4	15	1	1	0
Putamen	rs11605509	11	117396433	T	C	0.38	1.861e-08	0.753883	NA	2	DSCAML1	0	intronic	1.42	6	4	15	1	1	0
Putamen	rs11603366	11	117396505	G	T	0.38	2.369e-08	0.753883	NA	2	DSCAML1	0	intronic	0.166	5	4	15	1	1	0
Putamen	rs11603340	11	117396527	C	G	0.38	2.606e-08	0.753883	NA	2	DSCAML1	0	intronic	2.069	5	4	15	1	1	0
Putamen	rs1941390	11	117396991	G	A	0.38	3.246e-08	0.753883	NA	2	DSCAML1	0	intronic	0.482	NA	4	15	1	1	0
Putamen	rs12806934	11	117397482	C	T	0.252	5.12e-11	0.975065	rs4938401	2	DSCAML1	0	intronic	0.071	7	5	15	1	1	0
Putamen	rs7940527	11	117398202	G	C	0.4058	1.675e-08	0.773739	rs562422	2	DSCAML1	0	intronic	4.075	5	5	15	1	1	0
Putamen	rs4938399	11	117398399	C	T	0.25	6.443e-11	0.974995	rs4938401	2	DSCAML1	0	intronic	0.014	5	5	15	1	1	0
Putamen	rs4936384	11	117398591	C	T	0.378	1.542e-08	0.768286	NA	2	DSCAML1	0	intronic	1.541	5	5	15	1	1	1
Putamen	rs4938400	11	117399604	C	A	0.252	7.276e-12	0.994966	rs4938401	2	DSCAML1	0	intronic	3.728	2b	5	14	1	1	0
Putamen	rs4938401	11	117399605	T	G	0.253	6.896e-12	1	rs4938401	2	DSCAML1	0	intronic	0.592	2b	5	14	1	1	0
Putamen	rs4938402	11	117399918	G	A	0.2788	2.303e-11	0.882878	rs4938401	2	DSCAML1	0	intronic	0.398	6	5	14	1	1	0
Putamen	rs688968	11	117406739	C	G	0.2589	6.629e-11	0.950462	rs4938401	2	DSCAML1	0	intronic	18.56	5	1	15	1	1	0
Putamen	rs521609	11	117407301	G	A	0.374	4.021e-09	0.851171	NA	2	DSCAML1	0	intronic	4.189	5	2	15	1	1	0
Putamen	rs142945810	11	117407847	ACTCATAGGGACATATGGT	A	0.4871	1.874e-09	0.806678	rs562422	2	DSCAML1	0	intronic	9.01	NA	5	15	1	0	0
Putamen	rs557053	11	117408077	C	T	0.2956	2.426e-11	0.757509	rs4938401	2	DSCAML1	0	intronic	1.996	NA	5	15	1	0	0
Putamen	rs473343	11	117408156	G	C	0.4554	2.046e-08	0.902155	rs562422	2	DSCAML1	0	intronic	2.199	5	5	15	1	1	0
Putamen	rs661631	11	117408179	C	T	0.4921	6.361e-10	0.793238	rs562422	2	DSCAML1	0	intronic	0.159	NA	5	15	1	1	0
Putamen	rs3016797	11	117409884	G	C	0.25	7.362e-11	0.965046	rs4938401	2	DSCAML1	0	intronic	4.162	5	5	14	1	1	0
Putamen	rs2509004	11	117410423	G	A	0.3333	2.88e-09	0.642533	rs4938401	2	DSCAML1	0	intronic	0.562	7	5	15	1	0	0
Putamen	rs2509005	11	117410428	G	A	0.4861	3.009e-09	0.809182	rs562422	2	DSCAML1	0	intronic	2.255	7	5	15	1	1	0
Putamen	rs2509006	11	117410507	C	T	0.4861	2.361e-09	0.809182	rs562422	2	DSCAML1	0	intronic	1.593	5	5	15	1	0	0
Putamen	rs2510853	11	117410682	G	A	0.4137	4.762e-10	0.890624	NA	2	DSCAML1	0	intronic	2.322	5	5	15	1	1	0
Putamen	rs2509007	11	117410700	G	A	0.4861	2.229e-09	0.809182	rs562422	2	DSCAML1	0	intronic	5.16	5	5	15	1	0	0
Putamen	rs634867	11	117411041	G	A	0.2589	6.122e-11	0.923016	rs4938401	2	DSCAML1	0	intronic	1.507	7	5	15	1	0	0
Putamen	rs525110	11	117411392	A	G	0.2609	7.619e-11	0.923825	rs4938401	2	DSCAML1	0	intronic	1.781	7	5	15	1	0	0
Putamen	rs506836	11	117412453	C	T	0.2619	9.879e-11	0.919238	rs4938401	2	DSCAML1	0	intronic	2.609	5	5	15	1	0	0
Putamen	rs10632866	11	117412600	T	TTAGG	0.2589	7.265e-11	0.902881	rs4938401	2	DSCAML1	0	intronic	0.538	NA	5	15	1	0	0
Putamen	rs679223	11	117412621	G	A	0.2619	6.328e-11	0.919238	rs4938401	2	DSCAML1	0	intronic	1.297	5	5	15	1	0	0
Putamen	rs597583	11	117421799	C	G	0.374	3.712e-08	0.859143	NA	2	DSCAML1	0	intronic	0.134	7	5	14	1	1	0
Putamen	rs34646472	11	117422509	TG	T	0.2659	6.261e-09	0.901165	rs4938401	2	DSCAML1	0	intronic	7.03	NA	5	15	1	1	0
Putamen	rs580714	11	117423538	A	C	0.2599	2.146e-10	0.918375	rs4938401	2	DSCAML1	0	intronic	5.085	NA	5	15	1	0	0
Putamen	rs665218	11	117425003	G	A	0.2599	7.235e-11	0.918375	rs4938401	2	DSCAML1	0	intronic	2.548	NA	5	15	1	0	0
Putamen	rs579239	11	117425009	T	C	0.4504	2.472e-08	0.948797	rs562422	2	DSCAML1	0	intronic	0.746	6	5	15	1	1	0
Putamen	rs490111	11	117426543	A	G	0.3363	1.213e-09	0.628777	rs4938401	2	DSCAML1	0	intronic	0.29	NA	5	15	1	1	0
Putamen	rs562422	11	117428278	G	A	0.4365	1.203e-08	1	rs562422	2	DSCAML1	0	intronic	2.587	NA	5	15	1	1	0
Putamen	rs479591	11	117429034	G	A	0.4157	7.307e-09	1	rs479591	2	DSCAML1	0	intronic	0.359	6	5	15	1	0	0
Putamen	rs685440	11	117429718	G	T	0.3631	3.003e-09	0.851683	NA	2	DSCAML1	0	intronic	1.145	NA	5	15	1	1	0
Putamen	rs685425	11	117429728	C	T	0.3601	4.451e-09	0.842091	NA	2	DSCAML1	0	intronic	2.944	NA	5	15	1	1	0
Putamen	NA	11	117429845	A	AACG	0.3671	4.174e-09	0.864575	NA	2	DSCAML1	0	intronic	0.307	NA	5	15	1	0	0
Putamen	rs510250	11	117430058	G	T	0.4177	1.207e-08	0.992359	rs479591	2	DSCAML1	0	intronic	2.528	1f	5	15	1	0	0
Putamen	NA	11	117430841	A	G	0.4018	1.287e-10	1	NA	2	DSCAML1	0	intronic	4.225	NA	5	15	1	1	0
Putamen	rs623052	11	117431045	G	A	0.4673	1.421e-09	0.882835	rs562422	2	DSCAML1	0	intronic	1.75	NA	5	15	1	1	0
Putamen	rs475422	11	117431708	T	C	0.2312	2.642e-09	0.76933	rs34679147	2	DSCAML1	0	intronic	0.403	NA	5	15	1	0	0
Putamen	rs522742	11	117433965	G	A	0.2153	2.115e-09	0.765084	rs4938401	2	DSCAML1	0	intronic	1.887	NA	5	15	1	0	0
Putamen	rs685916	11	117434215	G	A	0.3502	5.733e-09	0.774285	NA	2	DSCAML1	0	intronic	1.133	7	5	15	1	0	0
Putamen	rs479601	11	117440171	A	G	0.2212	3.912e-09	0.744093	rs4938401	2	DSCAML1	0	intronic	1.591	NA	5	15	1	0	0
Putamen	rs631120	11	117440267	G	A	0.2153	9.564e-09	0.756268	rs4938401	2	DSCAML1	0	intronic	9.127	7	5	15	1	0	0
Putamen	rs491300	11	117442684	T	G	0.2252	2.986e-09	0.753197	rs34679147	2	DSCAML1	0	intronic	2.597	NA	5	15	1	0	1
Putamen	rs504935	11	117446945	T	C	0.2212	5.451e-10	0.833333	rs34679147	2	DSCAML1	0	intronic	0.731	NA	5	15	1	0	0
Putamen	rs505824	11	117447031	C	T	0.2212	5.451e-10	0.833333	rs34679147	2	DSCAML1	0	intronic	1.51	5	5	15	1	0	0
Putamen	rs536031	11	117451094	T	A	0.2202	5.56e-10	0.838379	rs34679147	2	DSCAML1	0	intronic	2.489	7	5	14	1	0	0
Putamen	rs495420	11	117456360	G	C	0.2292	4.959e-10	0.869188	rs34679147	2	DSCAML1	0	intronic	0.009	5	5	14	1	0	0
Putamen	rs34679147	11	117457839	G	GC	0.254	1.231e-08	1	rs34679147	2	DSCAML1	0	intronic	0.36	NA	5	14	1	0	0
Putamen	rs498889	11	117459662	T	C	0.2292	2.993e-10	0.87868	rs34679147	2	DSCAML1	0	intronic	14.48	NA	2	14	1	0	1
Putamen	rs634406	11	117460123	C	G	0.2282	4.031e-10	0.8742	rs34679147	2	DSCAML1	0	intronic	11.51	6	5	14	1	0	1
Putamen	rs8021018	14	56177508	C	T	0.246	6.328e-13	0.734589	rs1959089	3	KTN1	9263	intergenic	3.967	5	5	15	1	1	1
Putamen	rs9671291	14	56181695	G	A	0.2411	9.031e-13	0.753465	rs1959089	3	KTN1	13450	intergenic	5.816	5	5	15	0	1	0
Putamen	rs10143262	14	56185061	C	T	0.2163	2.76e-19	0.869336	rs1959089	3	KTN1	16816	intergenic	0.571	5	5	15	0	1	0
Putamen	rs8014725	14	56186953	A	G	0.2351	3.14e-20	1	rs1959089	3	KTN1	18708	intergenic	2.005	6	5	15	0	1	0
Putamen	rs10145631	14	56189330	T	G	0.2351	3.111e-20	1	rs1959089	3	KTN1	21085	intergenic	0.236	6	5	15	0	1	0
Putamen	rs8012377	14	56191413	C	T	0.2351	3.042e-20	1	rs1959089	3	KTN1	23168	intergenic	0.719	6	5	15	0	1	0
Putamen	rs7157327	14	56192450	T	C	0.2351	3.134e-20	1	rs1959089	3	RP11-813I20.2	22475	intergenic	1.747	7	5	15	0	1	0
Putamen	rs10129414	14	56193272	G	A	0.2351	3.134e-20	1	rs1959089	3	RP11-813I20.2	21653	intergenic	1.275	6	5	15	0	1	0
Putamen	rs148470213	14	56193700	C	T	0.2351	3.134e-20	1	rs1959089	3	RP11-813I20.2	21225	intergenic	11.61	7	5	15	0	1	0
Putamen	rs868202	14	56195762	T	C	0.2351	2.706e-20	1	rs1959089	3	RP11-813I20.2	19163	intergenic	1.134	5	5	15	0	1	1
Putamen	rs5808821	14	56196949	CT	C	0.2669	3.622e-17	0.839232	rs1959089	3	RP11-813I20.2	17976	intergenic	8.228	NA	5	15	0	0	0
Putamen	rs2342588	14	56197039	T	C	0.2619	3.36e-18	0.871649	rs1959089	3	RP11-813I20.2	17886	intergenic	2.927	7	5	15	0	1	0
Putamen	rs2342589	14	56197068	G	A	0.2619	3.36e-18	0.871649	rs1959089	3	RP11-813I20.2	17857	intergenic	3.299	7	5	15	0	1	0
Putamen	rs1953352	14	56197159	T	C	0.2619	3.474e-18	0.871649	rs1959089	3	RP11-813I20.2	17766	intergenic	0.627	7	5	15	0	1	0
Putamen	rs1953351	14	56197225	A	G	0.2351	1.68e-20	1	rs1959089	3	RP11-813I20.2	17700	intergenic	4.442	NA	5	15	0	1	0
Putamen	rs1953350	14	56197274	C	A	0.2351	1.671e-20	1	rs1959089	3	RP11-813I20.2	17651	intergenic	1.611	NA	5	15	0	1	0
Putamen	rs1959089	14	56197837	T	C	0.2351	1.269e-20	1	rs1959089	3	RP11-813I20.2	17088	intergenic	3.758	NA	5	15	0	1	1
Putamen	rs8017172	14	56199048	G	A	0.2361	2.808e-20	0.994571	rs1959089	3	RP11-813I20.2	15877	intergenic	1.564	5	5	15	0	1	0
Putamen	rs945270	14	56200473	C	G	0.2381	2.951e-20	0.983947	rs1959089	3	RP11-813I20.2	14452	intergenic	11.01	7	5	15	0	1	1
Putamen	rs8088299	18	50556725	T	G	0.4306	1.823e-08	0.748715	rs4602107	4	DCC	0	intronic	6.743	7	9	15	1	1	0
Putamen	rs7505888	18	50565946	T	C	0.4325	2.202e-08	0.743694	rs4602107	4	DCC	0	intronic	1.623	7	9	15	1	1	0
Putamen	rs386387718	18	50572849	G	GA	0.4226	3.497e-08	0.696807	rs4602107	4	DCC	0	intronic	2.346	NA	9	15	1	0	0
Putamen	NA	18	50574273	ATGTGTGTGTGTGTGTG	ATGTGTGTGTGTGTG	0.4335	3.719e-08	1	NA	4	DCC	0	intronic	NA	NA	9	15	1	0	0
Putamen	rs13381767	18	50574947	G	A	0.4256	1.196e-08	0.734233	rs4602107	4	DCC	0	intronic	0.938	6	9	15	1	0	0
Putamen	rs7244694	18	50576410	T	C	0.4266	8.152e-09	0.737072	rs4602107	4	DCC	0	intronic	2.655	6	9	15	1	0	0
Putamen	rs7229493	18	50577150	C	G	0.3909	2.636e-08	0.820791	NA	4	DCC	0	intronic	0.042	7	9	15	1	0	0
Putamen	rs6508193	18	50584544	A	G	0.4196	9.153e-09	0.777017	rs4602107	4	DCC	0	intronic	0.782	6	9	15	1	1	0
Putamen	rs11874659	18	50588260	T	C	0.4196	1.023e-08	0.785891	rs4602107	4	DCC	0	intronic	0.544	7	9	15	1	1	0
Putamen	rs8084454	18	50588945	T	A	0.4147	1.947e-09	0.775936	rs4602107	4	DCC	0	intronic	7.097	7	5	15	1	0	0
Putamen	rs8084270	18	50589376	G	A	0.4137	1.26e-09	0.772205	rs4602107	4	DCC	0	intronic	4.617	7	5	15	1	0	0
Putamen	rs66501208	18	50590741	A	C	0.378	3.944e-08	0.774224	NA	4	DCC	0	intronic	2.943	6	9	15	1	0	0
Putamen	rs8094435	18	50593115	A	G	0.4167	1.714e-09	0.76748	rs4602107	4	DCC	0	intronic	0.942	7	9	15	1	0	0
Putamen	rs8082863	18	50594568	C	G	0.4107	9.647e-09	0.790501	rs4602107	4	DCC	0	intronic	3.032	6	9	15	1	0	0
Putamen	rs9963521	18	50596618	T	C	0.4117	8.493e-09	0.786179	rs4602107	4	DCC	0	intronic	2.209	6	7	15	1	0	0
Putamen	rs6508195	18	50602476	C	T	0.4127	5.046e-09	0.826889	rs4602107	4	DCC	0	intronic	2.075	6	5	15	1	0	0
Putamen	rs12606343	18	50603493	A	C	0.4157	7.14e-09	0.828575	rs4602107	4	DCC	0	intronic	2.002	5	5	15	1	0	0
Putamen	rs28629395	18	50604504	G	A	0.4365	1.712e-09	0.909508	rs4602107	4	DCC	0	intronic	1.914	6	5	15	1	1	0
Putamen	rs4129323	18	50605360	G	C	0.4375	1.787e-09	0.905411	rs4602107	4	DCC	0	intronic	2.392	7	5	15	1	1	0
Putamen	rs12327491	18	50606585	G	A	0.4157	6.235e-09	0.827898	rs4602107	4	DCC	0	intronic	1.659	7	7	15	1	0	0
Putamen	rs35840237	18	50607475	T	A	0.4355	5.958e-09	0.928831	rs4602107	4	DCC	0	intronic	1.798	6	5	15	1	1	0
Putamen	rs9949928	18	50608590	A	G	0.4385	4.722e-09	0.956064	rs4602107	4	DCC	0	intronic	4.502	6	5	15	1	1	0
Putamen	rs3922754	18	50609302	T	C	0.4415	1.847e-09	0.991921	rs4602107	4	DCC	0	intronic	2.449	7	5	15	1	1	0
Putamen	rs5824989	18	50609391	AT	A	0.4097	4.993e-08	0.842277	rs4602107	4	DCC	0	intronic	2.049	NA	5	15	1	0	0
Putamen	rs4078161	18	50609919	G	T	0.4415	2.237e-09	0.991921	rs4602107	4	DCC	0	intronic	2.264	6	5	15	1	1	0
Putamen	rs7504413	18	50610528	T	C	0.4435	3.253e-09	0.991888	rs4602107	4	DCC	0	intronic	3.816	7	5	15	1	1	0
Putamen	rs55808525	18	50612317	G	A	0.4435	1.966e-08	1	rs4602107	4	DCC	0	intronic	0.302	7	15	15	1	0	0
Putamen	rs56132959	18	50612329	C	T	0.4435	1.212e-08	1	rs4602107	4	DCC	0	intronic	2.236	6	15	15	1	0	0
Putamen	rs62099176	18	50613489	C	T	0.4435	7.896e-09	1	rs4602107	4	DCC	0	intronic	1.032	6	15	15	1	1	0
Putamen	rs62099178	18	50613736	C	T	0.4315	3.827e-08	0.95419	rs4602107	4	DCC	0	intronic	0.932	7	15	15	1	0	0
Putamen	rs9948038	18	50614222	T	A	0.4425	7.323e-09	0.995965	rs4602107	4	DCC	0	intronic	1.015	7	15	15	1	0	0
Putamen	rs76228333	18	50614292	A	G	0.4425	7.921e-09	0.995965	rs4602107	4	DCC	0	intronic	1.03	7	15	15	1	0	0
Putamen	rs8088552	18	50614646	T	C	0.4435	2.453e-09	1	rs4602107	4	DCC	0	intronic	1.241	7	15	15	1	1	0
Putamen	rs7233997	18	50618359	G	A	0.4206	9.603e-09	0.913084	rs4602107	4	DCC	0	intronic	2.316	7	9	15	1	0	0
Putamen	rs9952089	18	50619266	A	G	0.4425	2.509e-09	0.995965	rs4602107	4	DCC	0	intronic	2.096	6	7	15	1	1	0
Putamen	NA	18	50619347	TA	TAA	0.4355	3.741e-08	0.968068	rs4602107	4	DCC	0	NA	NA	NA	7	15	1	0	0
Putamen	NA	18	50619347	TA	T	0.0009921	3.178e-09	0.968068	rs4602107	4	DCC	0	intronic	0.161	NA	7	15	1	1	0
Putamen	rs4453578	18	50620752	A	G	0.4435	3.11e-09	1	rs4602107	4	DCC	0	intronic	4.219	7	7	15	1	1	0
Putamen	rs4444405	18	50621027	C	A	0.4435	3.11e-09	1	rs4602107	4	DCC	0	intronic	4.97	7	7	15	1	1	0
Putamen	rs4270245	18	50621050	A	G	0.4435	3.11e-09	1	rs4602107	4	DCC	0	intronic	5.121	7	7	15	1	1	0
Putamen	rs4456578	18	50621094	A	G	0.4435	2.984e-09	1	rs4602107	4	DCC	0	intronic	2.906	7	7	15	1	1	0
Putamen	rs12607886	18	50621338	C	T	0.4206	1.056e-08	0.913084	rs4602107	4	DCC	0	intronic	6.354	6	7	15	1	0	0
Putamen	rs10502963	18	50621455	T	C	0.4206	1.056e-08	0.913084	rs4602107	4	DCC	0	intronic	9.397	6	7	15	1	0	0
Putamen	rs4426414	18	50621741	G	C	0.4435	3.302e-09	1	rs4602107	4	DCC	0	intronic	1.686	5	7	15	1	1	0
Putamen	rs12605900	18	50621755	T	A	0.4206	1.056e-08	0.913084	rs4602107	4	DCC	0	intronic	6.513	5	7	15	1	0	0
Putamen	rs34095568	18	50621987	C	T	0.4196	1.056e-08	0.909705	rs4602107	4	DCC	0	intronic	0.159	7	5	15	1	0	0
Putamen	rs35585120	18	50622015	A	C	0.4206	1.056e-08	0.913084	rs4602107	4	DCC	0	intronic	4.806	7	5	15	1	0	0
Putamen	rs34540811	18	50622068	C	T	0.4206	6.746e-09	0.913084	rs4602107	4	DCC	0	intronic	0.954	6	5	15	1	0	0
Putamen	rs34006123	18	50622104	C	T	0.4206	6.509e-09	0.913084	rs4602107	4	DCC	0	intronic	0.814	6	5	15	1	0	0
Putamen	rs8082811	18	50622242	A	G	0.4206	1.818e-08	0.913084	rs4602107	4	DCC	0	intronic	0.648	7	5	15	1	0	0
Putamen	rs35946824	18	50622354	G	C	0.4206	1.253e-08	0.913084	rs4602107	4	DCC	0	intronic	3.924	7	5	15	1	0	0
Putamen	rs56173310	18	50622374	A	G	0.4206	1.3e-08	0.913084	rs4602107	4	DCC	0	intronic	9.673	6	5	15	1	0	0
Putamen	rs8083463	18	50622457	G	A	0.4206	7.031e-09	0.913084	rs4602107	4	DCC	0	intronic	4.686	6	5	15	1	0	0
Putamen	rs8084433	18	50622550	T	A	0.4206	1.056e-08	0.913084	rs4602107	4	DCC	0	intronic	6.604	7	5	15	1	0	0
Putamen	rs9957443	18	50622857	T	G	0.4216	1.056e-08	0.909123	rs4602107	4	DCC	0	intronic	8.978	7	5	15	1	0	0
Putamen	rs16956110	18	50622885	C	T	0.4216	1.056e-08	0.909123	rs4602107	4	DCC	0	intronic	1.782	7	5	15	1	0	0
Putamen	rs9947827	18	50622997	G	A	0.4435	3.302e-09	1	rs4602107	4	DCC	0	intronic	7.973	7	5	15	1	1	0
Putamen	rs9947905	18	50623076	G	A	0.4444	3.302e-09	0.995952	rs4602107	4	DCC	0	intronic	2.649	7	5	15	1	1	0
Putamen	rs7506783	18	50625519	A	G	0.4435	3.302e-09	1	rs4602107	4	DCC	0	intronic	5.706	6	5	15	1	1	0
Putamen	rs7506904	18	50625779	G	A	0.4395	4.142e-09	0.984009	rs4602107	4	DCC	0	intronic	0.666	6	5	15	1	1	0
Putamen	rs4602107	18	50626385	T	C	0.4435	9.352e-10	1	rs4602107	4	DCC	0	intronic	0.156	7	5	15	1	1	0
Putamen	rs11876419	18	50627202	G	C	0.4435	3.361e-09	1	rs4602107	4	DCC	0	intronic	0.294	7	9	15	1	1	0
Putamen	rs7226390	18	50629407	A	C	0.4435	2.556e-09	1	rs4602107	4	DCC	0	intronic	5.421	6	9	15	1	1	0
Putamen	rs4497765	18	50630744	A	G	0.4494	1.324e-08	0.976167	rs4602107	4	DCC	0	intronic	0.17	7	9	15	1	1	0
Putamen	rs9946519	18	50631882	T	C	0.4435	3.361e-09	1	rs4602107	4	DCC	0	intronic	0.663	6	9	15	1	1	0
Putamen	rs7235008	18	50632813	T	C	0.4435	3.361e-09	1	rs4602107	4	DCC	0	intronic	1.71	5	9	15	1	1	0
Putamen	rs8083719	18	50638557	A	G	0.4435	4.298e-09	1	rs4602107	4	DCC	0	intronic	2.943	7	5	15	1	1	0
Putamen	rs10163983	18	50639009	C	G	0.4435	4.744e-09	1	rs4602107	4	DCC	0	intronic	0.512	6	5	15	1	1	0
Putamen	rs8089270	18	50639779	G	A	0.4435	4.298e-09	1	rs4602107	4	DCC	0	intronic	3.703	7	5	15	1	1	0
Putamen	rs11309009	18	50640083	CT	C	0.4415	2.681e-09	0.99193	rs4602107	4	DCC	0	intronic	1.247	NA	5	15	1	0	0
Putamen	rs4638654	18	50640310	A	G	0.4435	4.293e-09	1	rs4602107	4	DCC	0	intronic	0.64	7	5	15	1	1	0
Putamen	rs4474758	18	50641829	G	A	0.4474	4.902e-09	0.968002	rs4602107	4	DCC	0	intronic	0.966	7	5	15	1	1	0
Putamen	rs4534924	18	50642112	G	A	0.4474	4.716e-09	0.968002	rs4602107	4	DCC	0	intronic	1.112	6	5	15	1	1	0
Putamen	rs8088666	18	50648093	A	G	0.4425	4.884e-09	0.995965	rs4602107	4	DCC	0	intronic	1.479	6	9	15	1	1	0
Putamen	rs12970188	18	50650350	A	G	0.4385	4.602e-09	0.980015	rs4602107	4	DCC	0	intronic	12.61	7	5	15	1	1	0
Putamen	rs4548946	18	50651671	C	T	0.4425	4.884e-09	0.995965	rs4602107	4	DCC	0	intronic	1.161	6	5	15	1	1	0
Putamen	rs12454410	18	50655969	T	C	0.4385	4.884e-09	0.979953	rs4602107	4	DCC	0	intronic	2.18	5	5	15	1	1	0
Putamen	rs4371227	18	50657284	C	T	0.4425	4.884e-09	0.995965	rs4602107	4	DCC	0	intronic	6.216	6	7	15	1	1	0
Putamen	rs12607872	18	50658496	G	A	0.4395	4.884e-09	0.983943	rs4602107	4	DCC	0	intronic	1.562	7	9	15	1	1	0
Putamen	rs12966225	18	50658497	C	A	0.4395	4.884e-09	0.983943	rs4602107	4	DCC	0	intronic	0.12	7	9	15	1	1	0
Putamen	rs4530205	18	50658914	G	A	0.4395	4.884e-09	0.983943	rs4602107	4	DCC	0	intronic	10.44	6	9	15	1	1	0
Putamen	rs4315409	18	50660629	C	T	0.4425	4.884e-09	0.995965	rs4602107	4	DCC	0	intronic	17.08	6	9	15	1	1	0
Putamen	rs4349221	18	50661880	A	G	0.4395	4.165e-09	0.983943	rs4602107	4	DCC	0	intronic	8.985	7	9	15	1	1	0
Putamen	rs12965244	18	50663864	A	G	0.4395	4.165e-09	0.983943	rs4602107	4	DCC	0	intronic	1.52	7	5	15	1	1	0
Putamen	rs4578737	18	50664300	C	T	0.4425	4.165e-09	0.995965	rs4602107	4	DCC	0	intronic	1.956	7	5	15	1	1	0
Putamen	rs4423490	18	50664398	A	G	0.4415	4.165e-09	0.99193	rs4602107	4	DCC	0	intronic	2.277	6	5	15	1	1	0
Putamen	rs12457189	18	50665754	T	C	0.4435	2.769e-08	0.983842	rs4602107	4	DCC	0	intronic	7.547	5	5	15	1	1	0
Putamen	rs12456646	18	50668785	C	T	0.4425	4.965e-09	0.987899	rs4602107	4	DCC	0	intronic	0.06	6	5	15	1	1	0
Putamen	rs34266359	18	50669337	GT	G	0.4395	4.377e-09	0.975898	rs4602107	4	DCC	0	intronic	2.084	NA	5	15	1	1	0
Putamen	rs4939723	18	50673089	G	A	0.4325	7.794e-09	0.924428	rs4602107	4	DCC	0	intronic	0.041	6	5	15	1	1	0
Putamen	rs12967441	18	50675912	G	A	0.4315	1.166e-08	0.928638	rs4602107	4	DCC	0	intronic	0.113	7	5	15	1	1	0
Putamen	rs12967822	18	50676348	C	G	0.4315	1.166e-08	0.928638	rs4602107	4	DCC	0	intronic	2.045	6	5	15	1	1	0
Putamen	rs12454142	18	50676918	G	A	0.4315	1.132e-08	0.928638	rs4602107	4	DCC	0	intronic	0.754	7	5	15	1	1	0
Putamen	rs948524	18	50677159	T	C	0.4306	9.739e-09	0.924945	rs4602107	4	DCC	0	intronic	6.231	6	5	15	1	1	0
Putamen	rs12454839	18	50678200	A	G	0.4315	1.055e-08	0.928638	rs4602107	4	DCC	0	intronic	4.011	6	5	15	1	1	0
Putamen	rs8089296	18	50678587	A	G	0.2996	5.637e-09	0.995362	rs9964447	4	DCC	0	intronic	0.364	7	5	15	1	0	0
Putamen	rs10502959	18	50678732	C	T	0.4315	1.055e-08	0.928638	rs4602107	4	DCC	0	intronic	2.959	6	7	15	1	1	0
Putamen	rs35133257	18	50679234	C	CT	0.4286	1.055e-08	0.917222	rs4602107	4	DCC	0	intronic	1.823	NA	7	15	1	1	0
Putamen	rs12605603	18	50679866	C	G	0.4286	1.055e-08	0.917222	rs4602107	4	DCC	0	intronic	2.956	4	9	15	1	1	0
Putamen	rs9955274	18	50680177	G	A	0.2966	6.765e-09	0.981384	rs9964447	4	DCC	0	intronic	0.717	7	7	15	1	0	0
Putamen	rs11082969	18	50680524	C	G	0.4315	1.055e-08	0.928638	rs4602107	4	DCC	0	intronic	0.424	7	7	15	1	1	0
Putamen	rs11082970	18	50681121	G	T	0.4306	6.282e-09	0.924757	rs4602107	4	DCC	0	intronic	1.06	7	9	15	1	1	0
Putamen	rs34162293	18	50682135	G	A	0.4306	9.89e-09	0.932709	rs4602107	4	DCC	0	intronic	0.308	6	5	15	1	1	0
Putamen	rs9944703	18	50682524	A	G	0.2996	4.875e-09	0.995362	rs9964447	4	DCC	0	intronic	0.454	7	5	15	1	0	0
Putamen	rs6508197	18	50683213	T	C	0.2986	4.802e-09	1	rs9964447	4	DCC	0	intronic	1.677	6	5	15	1	0	0
Putamen	rs3819116	18	50683432	T	C	0.2986	4.935e-09	1	rs9964447	4	DCC	0	intronic	1.902	7	5	15	1	0	0
Putamen	rs9963392	18	50684362	T	C	0.2956	4.978e-09	0.986028	rs9964447	4	DCC	0	intronic	0.406	6	5	15	1	0	0
Putamen	rs9963399	18	50684378	T	G	0.2956	4.978e-09	0.986028	rs9964447	4	DCC	0	intronic	0.205	7	5	15	1	0	0
Putamen	rs9957223	18	50686049	A	G	0.2956	6.134e-09	0.986028	rs9964447	4	DCC	0	intronic	0.706	6	5	15	1	0	0
Putamen	rs34708933	18	50686091	AT	A	0.2956	6.134e-09	0.986028	rs9964447	4	DCC	0	intronic	0.625	NA	5	15	1	0	0
Putamen	rs4245253	18	50686267	A	G	0.2956	6.134e-09	0.986028	rs9964447	4	DCC	0	intronic	0.281	6	5	15	1	0	0
Putamen	rs4245254	18	50686592	A	G	0.2956	6.134e-09	0.986028	rs9964447	4	DCC	0	intronic	0.178	7	5	15	1	0	0
Putamen	rs4245255	18	50686651	C	G	0.2956	6.134e-09	0.986028	rs9964447	4	DCC	0	intronic	2.869	6	5	15	1	0	0
Putamen	rs4636988	18	50686759	A	C	0.2956	6.134e-09	0.986028	rs9964447	4	DCC	0	intronic	4.301	5	5	15	1	0	0
Putamen	rs4264463	18	50686844	T	C	0.2956	6.134e-09	0.986028	rs9964447	4	DCC	0	intronic	1.103	5	5	15	1	0	0
Putamen	rs4940240	18	50686958	G	A	0.2956	6.134e-09	0.986028	rs9964447	4	DCC	0	intronic	5.666	5	5	15	1	0	0
Putamen	rs4940241	18	50686991	A	G	0.2966	5.566e-09	0.981384	rs9964447	4	DCC	0	intronic	3.932	7	5	15	1	0	0
Putamen	rs4940242	18	50687196	G	A	0.4276	1.034e-08	0.921318	rs4602107	4	DCC	0	intronic	3.002	7	5	15	1	1	0
Putamen	rs28679630	18	50688076	C	G	0.2986	7.557e-09	1	rs9964447	4	DCC	0	intronic	1.519	6	5	15	1	0	0
Putamen	rs28631779	18	50688149	T	C	0.2986	5.74e-09	1	rs9964447	4	DCC	0	intronic	0.785	6	5	15	1	0	0
Putamen	rs4513167	18	50688529	C	T	0.4256	1.241e-08	0.914284	rs4602107	4	DCC	0	intronic	2.269	7	5	15	1	1	0
Putamen	rs9953629	18	50688612	T	C	0.2986	4.095e-09	1	rs9964447	4	DCC	0	intronic	3.679	6	5	15	1	0	0
Putamen	rs9964447	18	50688627	C	A	0.2986	4.063e-09	1	rs9964447	4	DCC	0	intronic	2.17	7	5	15	1	0	0
Putamen	rs9964451	18	50688636	C	T	0.2986	4.19e-09	1	rs9964447	4	DCC	0	intronic	1.946	6	5	15	1	0	0
Putamen	rs4380113	18	50688715	A	T	0.2986	7.952e-09	1	rs9964447	4	DCC	0	intronic	0.342	7	5	15	1	0	0
Putamen	rs4380114	18	50688733	A	G	0.2956	7.952e-09	0.986028	rs9964447	4	DCC	0	intronic	5.424	7	5	15	1	0	0
Putamen	rs4525560	18	50688767	T	C	0.2986	5.984e-09	1	rs9964447	4	DCC	0	intronic	1.543	7	5	15	1	0	0
Putamen	rs4940243	18	50688900	C	G	0.2986	5.984e-09	1	rs9964447	4	DCC	0	intronic	1.095	7	5	15	1	0	0
Putamen	rs7226571	18	50688970	T	C	0.2986	5.984e-09	1	rs9964447	4	DCC	0	intronic	0.576	6	5	15	1	0	0
Putamen	rs4245256	18	50689309	T	C	0.2986	5.984e-09	1	rs9964447	4	DCC	0	intronic	2.56	7	5	15	1	0	0
Putamen	rs4410149	18	50689522	T	A	0.2986	5.984e-09	1	rs9964447	4	DCC	0	intronic	0.527	6	5	15	1	0	0
Putamen	rs5824993	18	50689632	A	AT	0.4306	1.004e-08	0.932709	rs4602107	4	DCC	0	intronic	5.642	NA	5	15	1	1	0
Putamen	rs4359515	18	50689809	T	G	0.2986	6.08e-09	1	rs9964447	4	DCC	0	intronic	2.193	6	5	15	1	0	0
Putamen	rs4444404	18	50690643	T	C	0.2986	5.652e-09	1	rs9964447	4	DCC	0	intronic	0.724	7	9	15	1	0	0
Putamen	rs4372757	18	50690774	C	T	0.2986	5.652e-09	1	rs9964447	4	DCC	0	intronic	0.366	7	9	15	1	0	0
Putamen	rs4940244	18	50691838	A	G	0.2986	5.793e-09	1	rs9964447	4	DCC	0	intronic	4.065	5	9	15	1	0	0
Putamen	rs9959914	18	50692458	A	G	0.2986	5.793e-09	1	rs9964447	4	DCC	0	intronic	0.297	7	9	15	1	0	0
Putamen	rs9949312	18	50692534	T	A	0.2986	5.652e-09	1	rs9964447	4	DCC	0	intronic	0.083	7	9	15	1	0	0
Putamen	rs12457406	18	50692708	C	A	0.2986	5.255e-09	1	rs9964447	4	DCC	0	intronic	1.765	6	9	15	1	0	0
Putamen	rs12457407	18	50692709	C	G	0.3036	5.255e-09	0.97687	rs9964447	4	DCC	0	intronic	2.903	6	9	15	1	0	0
Putamen	rs4245257	18	50693727	C	T	0.2986	5.793e-09	1	rs9964447	4	DCC	0	intronic	0.247	7	9	15	1	0	0
Putamen	rs4939724	18	50693880	A	T	0.2986	5.793e-09	1	rs9964447	4	DCC	0	intronic	3.28	7	9	15	1	0	0
Putamen	rs4940245	18	50694137	A	G	0.4306	9.524e-09	0.932709	rs4602107	4	DCC	0	intronic	0.797	7	9	15	1	1	0
Putamen	rs4614799	18	50694304	G	A	0.4306	1.1e-08	0.932709	rs4602107	4	DCC	0	intronic	1.715	6	9	15	1	1	0
Putamen	rs4291978	18	50694535	A	G	0.2986	6.584e-09	1	rs9964447	4	DCC	0	intronic	0.195	7	9	15	1	0	0
Putamen	NA	18	50698226	TA	T	0.4246	1.17e-08	0.869241	rs4602107	4	DCC	0	intronic	0.876	NA	9	15	1	0	0
Putamen	rs7505192	18	50701130	A	G	0.4266	1.045e-08	0.910256	rs4602107	4	DCC	0	intronic	3.055	6	15	15	1	1	0
Putamen	rs11082971	18	50701382	C	G	0.4355	9.828e-09	0.911896	rs4602107	4	DCC	0	intronic	1.67	7	15	15	1	1	0
Putamen	rs12455021	18	50701855	C	G	0.4306	1.294e-08	0.924945	rs4602107	4	DCC	0	intronic	0.621	7	15	15	1	1	0
Putamen	rs147465777	18	50703575	A	G	0.4315	1.062e-08	0.928638	rs4602107	4	DCC	0	intronic	4.41	7	15	15	1	1	0
Putamen	rs4419125	18	50703811	T	A	0.4266	1.164e-08	0.910256	rs4602107	4	DCC	0	intronic	1.269	6	9	15	1	1	0
Putamen	rs12455474	18	50705765	T	G	0.4256	1.261e-08	0.906436	rs4602107	4	DCC	0	intronic	1.907	7	9	15	1	1	0
Putamen	rs10853627	18	50706073	T	C	0.4256	1.223e-08	0.906436	rs4602107	4	DCC	0	intronic	0.104	6	9	15	1	1	0
Putamen	rs10775504	18	50706247	G	A	0.2986	5.722e-09	0.990621	rs9964447	4	DCC	0	intronic	0.705	5	9	15	1	1	0
Putamen	rs2000696	18	50706382	G	A	0.4306	1.116e-08	0.924757	rs4602107	4	DCC	0	intronic	0.072	NA	9	15	1	1	0
Putamen	rs12454147	18	50707053	G	T	0.4306	1.028e-08	0.924757	rs4602107	4	DCC	0	intronic	1.124	5	9	15	1	1	0
Putamen	rs12456765	18	50707165	T	C	0.4236	1.418e-08	0.891667	rs4602107	4	DCC	0	intronic	1.173	7	9	15	1	1	0
Putamen	rs12454116	18	50707180	A	G	0.4236	1.351e-08	0.891667	rs4602107	4	DCC	0	intronic	3.398	6	9	15	1	1	0
Putamen	rs8083850	18	50707292	A	G	0.4266	1.418e-08	0.909995	rs4602107	4	DCC	0	intronic	4.496	7	9	15	1	1	0
Putamen	rs4940246	18	50717386	T	C	0.4315	2.089e-08	0.920725	rs4602107	4	DCC	0	intronic	3.795	7	9	15	1	1	0
Putamen	rs12604508	18	50730441	A	G	0.4306	1.903e-08	0.924757	rs4602107	4	DCC	0	intronic	2.138	5	5	15	1	1	0
Putamen	rs55957902	18	50732559	C	T	0.4296	1.323e-08	0.904675	rs4602107	4	DCC	0	intronic	0.555	NA	5	15	1	0	0
Putamen	rs72923258	18	50740767	A	T	0.4355	4.633e-08	0.89615	rs4602107	4	DCC	0	intronic	4.963	6	9	15	1	1	0
MAF: minor allele frequency; IndSigSNPs: independent significant SNPs; CADD: combined annotation dependent depletion; RDB: RegulomeDB; NA: Not Applicable.
Reference: https://fuma.ctglab.nl/

## Sheet: S2
Supplementary Table 2. Genes mapped in the meta-analysis using SNP2GENE
Phenotype	ENSG ID	Symbol gene	Chromosome	Start	End	Strand	Type	EntrezID	HUGO (HGNC) gene symbol	pLI	ncRVIS	posMapSNPs	posMapMaxCADD	eqtlMapSNPs	eqtlMapminP	eqtlMapminQ	eqtlMapts	eqtlDirection	ciMap	ciMapts	minGwasP	IndSigSNPs	Genomic locus
Brainstem	ENSG00000055332	EIF2AK2	2	37326353	37384208	-1	protein_coding	5610	EIF2AK2	0.0515534	-2.12188	0	0	6	2.59355e-14	1.56797e-06	xQTLServer_eQTLs	NA	No	NA	1.247e-10	rs9640015;rs9640011	1
Brainstem	ENSG00000234432	RP11-1275H24.1	7	5465908	5468558	-1	lincRNA	100129484	NA	NA	NA	0	0	3	3.97737e-06	0.0145551	GTEx/v8/Brain_Cerebellum	NA	No	NA	1.915e-10	rs9640015;rs9640011	1
Brainstem	ENSG00000122543	OCM	7	5919458	5925993	1	protein_coding	654231	OCM	5.57373e-06	0.250079	0	0	7	4.09286e-09	7.03715e-06	BIOSQTL/BIOS_eQTL_geneLevel:GTEx/v8/Skin_Not_Sun_Exposed_Suprapubic:GTEx/v8/Thyroid:GTEx/v7/Thyroid	NA	No	NA	1.247e-10	rs9640015;rs9640011	1
Brainstem	ENSG00000122674	CCZ1	7	5938356	5965605	1	protein_coding	221960	CCZ1	0.994695	NA	0	0	92	3.04568e-23	0	BIOSQTL/BIOS_eQTL_geneLevel:CMC_SVA_cis:CMC_NoSVA_cis:GTEx/v8/Adipose_Subcutaneous:GTEx/v8/Adipose_Visceral_Omentum:GTEx/v8/Whole_Blood:GTEx/v8/Artery_Aorta:GTEx/v8/Artery_Tibial:GTEx/v8/Brain_Caudate_basal_ganglia:GTEx/v8/Brain_Nucleus_accumbens_basal_ganglia:GTEx/v8/Breast_Mammary_Tissue:GTEx/v8/Colon_Transverse:GTEx/v8/Esophagus_Mucosa:GTEx/v8/Esophagus_Muscularis:GTEx/v8/Heart_Left_Ventricle:…	NA	No	NA	1.247e-10	rs2302334;rs9640015;rs9640011	1
Brainstem	ENSG00000155026	RSPH10B	7	5965181	6010314	-1	protein_coding	222967	RSPH10B	NA	-0.813417	0	0	19	3.04888e-07	0.000222114	BIOSQTL/BIOS_eQTL_geneLevel	NA	No	NA	2.333e-10	rs2302334;rs9640011;rs9640015	1
Brainstem	ENSG00000122512	PMS2	7	6012870	6048756	-1	protein_coding	5395	PMS2	1.13904e-13	0.128439	34	16.14	103	4.7099e-45	0	BIOSQTL/BIOS_eQTL_geneLevel:CMC_SVA_cis:CMC_NoSVA_cis:GTEx/v8/Adipose_Subcutaneous:GTEx/v8/Adipose_Visceral_Omentum:GTEx/v8/Adrenal_Gland:GTEx/v8/Whole_Blood:GTEx/v8/Artery_Aorta:GTEx/v8/Artery_Coronary:GTEx/v8/Artery_Tibial:GTEx/v8/Brain_Cerebellum:GTEx/v8/Brain_Cortex:GTEx/v8/Brain_Nucleus_accumbens_basal_ganglia:GTEx/v8/Breast_Mammary_Tissue:GTEx/v8/Colon_Sigmoid:GTEx/v8/Colon_Transverse:GTEx/…	NA	No	NA	1.233e-10	rs2302334;rs9640011;rs9640015	1
Brainstem	ENSG00000201990	Y_RNA	7	6043914	6044016	-1	misc_RNA	NA	NA	NA	NA	25	16.14	0	NA	NA	NA	NA	No	NA	4.173e-08	rs9640011;rs2302334	1
Brainstem	ENSG00000106305	AIMP2	7	6048876	6063465	1	protein_coding	7965	AIMP2	0.00146308	0.143748	38	24.1	33	2.79087e-17	0	BIOSQTL/BIOS_eQTL_geneLevel:GTEx/v8/Adipose_Subcutaneous:GTEx/v8/Esophagus_Mucosa:GTEx/v8/Cells_Cultured_fibroblasts:GTEx/v8/Thyroid:GTEx/v7/Esophagus_Mucosa	NA	No	NA	1.233e-10	rs9640011;rs2302334;rs9640015	1
Brainstem	ENSG00000207217	SNORA42	7	6056508	6056642	1	snoRNA	NA	NA	NA	NA	18	24.1	77	1.77574e-37	0	BIOSQTL/BIOS_eQTL_geneLevel:GTEx/v8/Brain_Cerebellar_Hemisphere:GTEx/v8/Brain_Cerebellum:GTEx/v8/Brain_Cortex:GTEx/v8/Brain_Frontal_Cortex_BA9:GTEx/v7/Brain_Cerebellar_Hemisphere:GTEx/v7/Brain_Cerebellum:GTEx/v6/Brain_Cerebellum:GTEx/v6/Brain_Cortex	NA	No	NA	2.333e-10	rs9640011;rs2302334;rs9640015	1
Brainstem	ENSG00000086232	EIF2AK1	7	6061881	6098861	-1	protein_coding	27102	EIF2AK1	0.000121058	0.776729	88	24.1	110	1.29564e-50	0	BIOSQTL/BIOS_eQTL_geneLevel:CMC_SVA_cis:CMC_NoSVA_cis:GTEx/v8/Adipose_Subcutaneous:GTEx/v8/Adipose_Visceral_Omentum:GTEx/v8/Adrenal_Gland:GTEx/v8/Cells_EBV-transformed_lymphocytes:GTEx/v8/Artery_Aorta:GTEx/v8/Artery_Coronary:GTEx/v8/Artery_Tibial:GTEx/v8/Brain_Anterior_cingulate_cortex_BA24:GTEx/v8/Brain_Caudate_basal_ganglia:GTEx/v8/Brain_Cortex:GTEx/v8/Brain_Frontal_Cortex_BA9:GTEx/v8/Brain_Hyp…	NA	Yes	Adult_Cortex	1.233e-10	rs2302334;rs9640011;rs9640015;rs9640015:rs2302334	1
Brainstem	ENSG00000157999	ANKRD61	7	6071007	6076017	1	protein_coding	100310846	ANKRD61	NA	0.322396	35	24.1	83	3.67378e-17	0	BIOSQTL/BIOS_eQTL_geneLevel:GTEx/v8/Cells_EBV-transformed_lymphocytes:GTEx/v8/Breast_Mammary_Tissue:GTEx/v8/Lung:GTEx/v8/Nerve_Tibial:GTEx/v8/Pancreas:GTEx/v8/Pituitary:GTEx/v8/Cells_Cultured_fibroblasts:GTEx/v8/Skin_Not_Sun_Exposed_Suprapubic:GTEx/v8/Skin_Sun_Exposed_Lower_leg:GTEx/v8/Spleen:GTEx/v8/Testis:GTEx/v8/Thyroid:GTEx/v7/Cells_Transformed_fibroblasts:GTEx/v7/Skin_Not_Sun_Exposed_Suprapu…	NA	No	NA	1.247e-10	rs2302334;rs9640011;rs9640015	1
Brainstem	ENSG00000240718	RN7SL851P	7	6087354	6087651	-1	misc_RNA	NA	RN7SL851P	NA	NA	33	7.114	0	NA	NA	NA	NA	No	NA	1.113e-09	rs2302334;rs9640011	1
Brainstem	ENSG00000252929	RNU6-218P	7	6097131	6097235	1	snRNA	NA	RNU6-218P	NA	NA	41	11.35	0	NA	NA	NA	NA	No	NA	1.286e-09	rs9640011;rs2302334;rs9640015	1
Brainstem	ENSG00000231704	AC004895.4	7	6120734	6132716	1	lincRNA	NA	NA	NA	NA	18	7.5	8	1.23713e-05	0.00350561	GTEx/v8/Thyroid	NA	Yes	GM12878:IMR90:Mesenchymal_Stem_Cell:hESC	1.233e-10	rs9640015;rs9640011;rs2302334;rs9640011:rs2302334:rs9640015;rs9640011:rs9640015	1
Brainstem	ENSG00000264605	AC004895.1	7	6122736	6122805	1	miRNA	NA	NA	NA	NA	14	7.5	0	NA	NA	NA	NA	No	NA	1.233e-10	rs2302334;rs9640015;rs9640011	1
Brainstem	ENSG00000106346	USP42	7	6144515	6201195	1	protein_coding	84132	USP42	0.998682	-0.466138	0	0	0	NA	NA	NA	NA	Yes	GM12878:IMR90:Mesenchymal_Stem_Cell:hESC	1.247e-10	rs9640011:rs2302334:rs9640015;rs9640011:rs9640015	1
Brainstem	ENSG00000008256	CYTH3	7	6201407	6312275	-1	protein_coding	9265	CYTH3	0.356369	-0.520862	0	0	61	1.07279e-08	1.30386e-10	BIOSQTL/BIOS_eQTL_geneLevel:GTEx/v8/Cells_Cultured_fibroblasts	NA	Yes	IMR90	1.233e-10	rs2302334;rs9640015;rs9640011;rs9640011:rs2302334:rs9640015;rs9640011:rs9640015	1
Brainstem	ENSG00000178397	FAM220A	7	6369040	6388612	-1	protein_coding	84792	FAM220A	1.23122e-05	NA	0	0	0	NA	NA	NA	NA	Yes	IMR90	1.247e-10	rs9640011:rs2302334:rs9640015;rs9640011:rs9640015	1
Brainstem	ENSG00000136238	RAC1	7	6414154	6443608	1	protein_coding	5879	RAC1	0.572395	NA	0	0	50	3.2202e-07	4.85667e-11	GTEx/v8/Thyroid	NA	Yes	Left_Ventricle:GM12878:IMR90:Mesenchymal_Stem_Cell:Mesendoderm:Trophoblast-like_Cell:hESC	1.247e-10	rs2302334;rs9640011:rs2302334:rs9640015;rs9640011:rs9640015	1
Brainstem	ENSG00000164535	DAGLB	7	6448757	6523821	-1	protein_coding	221955	DAGLB	1.65016e-06	-0.350633	0	0	4	NA	0.049	CMC_SVA_cis	NA	No	NA	7.495e-08	rs2302334	1
Brainstem	ENSG00000187953	PMS2CL	7	6749759	6793493	1	pseudogene	441194	PMS2CL	NA	NA	0	0	37	7.30561e-14	3.35384e-39	CMC_SVA_cis:CMC_NoSVA_cis:GTEx/v8/Adrenal_Gland:GTEx/v8/Artery_Tibial:GTEx/v8/Brain_Amygdala:GTEx/v8/Brain_Anterior_cingulate_cortex_BA24:GTEx/v8/Brain_Caudate_basal_ganglia:GTEx/v8/Brain_Cerebellar_Hemisphere:GTEx/v8/Brain_Cerebellum:GTEx/v8/Brain_Cortex:GTEx/v8/Brain_Frontal_Cortex_BA9:GTEx/v8/Brain_Hippocampus:GTEx/v8/Brain_Hypothalamus:GTEx/v8/Brain_Nucleus_accumbens_basal_ganglia:GTEx/v8/Bra…	NA	No	NA	1.233e-10	rs9640015;rs9640011;rs2302334	1
Brainstem	ENSG00000146574	CCZ1B	7	6833765	6866401	-1	protein_coding	221960	CCZ1B	NA	-1.07095	0	0	74	8.10226e-10	6.74532e-73	CMC_SVA_cis:CMC_NoSVA_cis:GTEx/v8/Adipose_Subcutaneous:GTEx/v8/Adipose_Visceral_Omentum:GTEx/v8/Artery_Tibial:GTEx/v8/Brain_Caudate_basal_ganglia:GTEx/v8/Brain_Cerebellum:GTEx/v8/Brain_Nucleus_accumbens_basal_ganglia:GTEx/v8/Colon_Transverse:GTEx/v8/Esophagus_Mucosa:GTEx/v8/Esophagus_Muscularis:GTEx/v8/Heart_Left_Ventricle:GTEx/v8/Lung:GTEx/v8/Muscle_Skeletal:GTEx/v8/Nerve_Tibial:GTEx/v8/Cells_Cu…	NA	No	NA	1.247e-10	rs2302334;rs9640011;rs9640015	1
Caudate	ENSG00000142611	PRDM16	1	2985732	3355185	1	protein_coding	63976	PRDM16	0.999843	1.53566	22	14.3	0	NA	NA	NA	NA	No	NA	4.612e-09	rs2817145	1
Caudate	ENSG00000231611	AP006216.11	11	116645826	116646592	-1	lincRNA	NA	NA	NA	NA	0	0	2	2.33218e-06	0.0232661	GTEx/v7/Artery_Coronary	NA	No	NA	3.319e-09	rs2510853	3
Caudate	ENSG00000235910	APOA1-AS	11	116706833	116726445	1	antisense	NA	APOA1-AS	NA	NA	0	0	2	1.09162e-05	0.0020278	GTEx/v8/Adipose_Subcutaneous	NA	No	NA	3.18e-11	rs623052;rs2510853	3
Caudate	ENSG00000254851	RP11-109L13.1	11	117006244	117009298	1	pseudogene	NA	NA	NA	NA	0	0	3	1.06217e-05	1.37953e-48	GTEx/v7/Artery_Aorta	NA	No	NA	5.955e-05	rs2276341	3
Caudate	ENSG00000149577	SIDT2	11	117049449	117068160	1	protein_coding	51092	SIDT2	0.0025724	-0.315318	0	0	0	NA	NA	NA	NA	Yes	Fetal_Cortex	2.316e-09	rs4938401:rs623052;rs2510853	3
Caudate	ENSG00000177103	DSCAML1	11	117298489	117688240	-1	protein_coding	57453	DSCAML1	0.999999	NA	95	18.56	26	5.18637e-06	5.79054e-18	GTEx/v8/Pituitary:GTEx/v8/Testis	NA	No	NA	3.18e-11	rs2276341;rs4938401;rs623052;rs2510853	3
Caudate	ENSG00000254528	RP11-728F11.4	11	117704434	117709657	1	antisense	NA	NA	NA	NA	0	0	2	2.60553e-05	0.0337134	GTEx/v7/Nerve_Tibial	NA	No	NA	3.495e-08	rs2276341;rs4938401	3
Caudate	ENSG00000110324	IL10RA	11	117857063	117872196	1	protein_coding	3587	IL10RA	0.968346	-0.921352	0	0	0	NA	NA	NA	NA	Yes	IMR90:Mesenchymal_Stem_Cell:Trophoblast-like_Cell:hESC	2.316e-09	rs2276341:rs2276341;rs4938401:rs4938401:rs623052;rs2510853	3
Caudate	ENSG00000255274	TMPRSS4-AS1	11	117886487	117957508	-1	antisense	100526771	TMPRSS4-AS1	NA	NA	0	0	3	6.21372e-05	0.0124049	GTEx/v8/Testis:GTEx/v8/Thyroid	NA	No	NA	2.894e-09	rs623052;rs2510853;rs4938401	3
Caudate	ENSG00000177098	SCN4B	11	118004092	118023603	-1	protein_coding	6330	SCN4B	0.00153523	-0.49413	0	0	0	NA	NA	NA	NA	Yes	Mesenchymal_Stem_Cell	2.316e-09	rs2276341:rs2276341;rs4938401:rs4938401:rs623052;rs2510853	3
Caudate	ENSG00000149575	SCN2B	11	118032666	118047388	-1	protein_coding	6327	SCN2B	0.133477	4.70964	0	0	0	NA	NA	NA	NA	Yes	Adult_Cortex	2.316e-09	rs4938401:rs623052;rs2510853	3
Caudate	ENSG00000160588	MPZL3	11	118097409	118123065	-1	protein_coding	196264	MPZL3	6.5217e-09	0.275003	0	0	0	NA	NA	NA	NA	Yes	IMR90:Mesenchymal_Stem_Cell	2.316e-09	rs2276341:rs2276341;rs4938401:rs4938401:rs623052;rs2510853	3
Caudate	ENSG00000149573	MPZL2	11	118124118	118135251	-1	protein_coding	10205	MPZL2	1.2192e-11	1.21741	0	0	0	NA	NA	NA	NA	Yes	IMR90:Mesenchymal_Stem_Cell	2.316e-09	rs2276341:rs2276341;rs4938401:rs4938401:rs623052;rs2510853	3
Caudate	ENSG00000167286	CD3D	11	118209669	118213459	-1	protein_coding	915	CD3D	0.00662795	0.00400454	0	0	6	5.81823e-05	0.0478205	GTEx/v8/Esophagus_Mucosa	NA	No	NA	2.398e-10	rs2510853;rs623052	3
Caudate	ENSG00000255435	RP11-770J1.3	11	118382626	118401809	-1	antisense	NA	NA	NA	NA	0	0	4	1.70028e-05	0.0260536	GTEx/v7/Muscle_Skeletal	NA	No	NA	2.659e-09	rs623052	3
Caudate	ENSG00000149582	TMEM25	11	118401756	118417995	1	protein_coding	84866	TMEM25	0.000421369	1.1467	0	0	1	1.8171e-05	0.04885	GTEx/v7/Pancreas	NA	No	NA	1.142e-07	rs4938401	3
Caudate	ENSG00000204842	ATXN2	12	111890018	112037480	-1	protein_coding	6311	ATXN2	0.999862	-0.359942	0	0	0	NA	NA	NA	NA	Yes	Liver:IMR90:Mesenchymal_Stem_Cell:Trophoblast-like_Cell	3.002e-10	rs11066280;rs2074356;NA	4
Caudate	ENSG00000258099	RP11-686G8.2	12	112037302	112038060	1	antisense	NA	NA	NA	NA	0	0	0	NA	NA	NA	NA	Yes	Liver:IMR90:Mesenchymal_Stem_Cell:Trophoblast-like_Cell	3.002e-10	rs11066280;rs2074356;NA	4
Caudate	ENSG00000089234	BRAP	12	112079950	112123790	-1	protein_coding	8315	BRAP	0.0157033	-0.900035	2	18.03	0	NA	NA	NA	NA	Yes	GM12878:IMR90:Mesenchymal_Stem_Cell:Mesendoderm:Trophoblast-like_Cell:hESC	3.002e-10	rs11066280;rs2074356;NA	4
Caudate	ENSG00000258359	PCNPP1	12	112107656	112108166	-1	pseudogene	NA	PCNPP1	NA	NA	1	18.03	0	NA	NA	NA	NA	No	NA	5.191e-10	rs11066280;rs2074356;NA	4
Caudate	ENSG00000111271	ACAD10	12	112123857	112194903	1	protein_coding	80724	ACAD10	4.01457e-20	-0.311041	3	4.172	0	NA	NA	NA	NA	Yes	GM12878:IMR90:Mesenchymal_Stem_Cell:Mesendoderm:Trophoblast-like_Cell:hESC	3.002e-10	rs11066280;rs2074356;NA	4
Caudate	ENSG00000257767	RP11-162P23.2	12	112191694	112229222	1	protein_coding	NA	NA	NA	NA	1	0.762	0	NA	NA	NA	NA	No	NA	3.002e-10	rs11066280;rs2074356;NA	4
Caudate	ENSG00000111275	ALDH2	12	112204691	112247782	1	protein_coding	217	ALDH2	1.73245e-06	NA	3	34	0	NA	NA	NA	NA	Yes	Adult_Cortex:GM12878:IMR90:Mesenchymal_Stem_Cell:hESC	3.002e-10	rs11066280;rs2074356;NA;rs369008737	4
Caudate	ENSG00000257877	RP3-462E2.3	12	112250597	112251224	1	lincRNA	NA	NA	NA	NA	2	34	0	NA	NA	NA	NA	No	NA	4.595e-10	rs369008737;rs11066280;rs2074356;NA	4
Caudate	ENSG00000234608	MAPKAPK5-AS1	12	112277571	112280706	-1	lincRNA	51275	MAPKAPK5-AS1	NA	NA	0	0	0	NA	NA	NA	NA	Yes	GM12878:IMR90:Mesenchymal_Stem_Cell	3.002e-10	rs11066280;rs2074356;NA	4
Caudate	ENSG00000248594	AC003029.1	12	112277571	112279211	-1	pseudogene	NA	NA	NA	NA	0	0	0	NA	NA	NA	NA	Yes	GM12878:IMR90:Mesenchymal_Stem_Cell	3.002e-10	rs11066280;rs2074356;NA	4
Caudate	ENSG00000089022	MAPKAPK5	12	112279782	112334343	1	protein_coding	8550	MAPKAPK5	0.0234226	NA	1	15.9	0	NA	NA	NA	NA	Yes	GM12878:IMR90:Mesenchymal_Stem_Cell	3.002e-10	rs11066280;rs2074356;NA;rs369008737	4
Caudate	ENSG00000270018	RP3-462E2.5	12	112335140	112335710	1	lincRNA	NA	NA	NA	NA	1	15.9	0	NA	NA	NA	NA	No	NA	9.7e-10	rs11066280;rs2074356;NA;rs369008737	4
Caudate	ENSG00000229186	ADAM1A	12	112337067	112340042	1	pseudogene	NA	ADAM1A	NA	NA	1	15.9	0	NA	NA	NA	NA	No	NA	9.7e-10	rs11066280;rs2074356;NA;rs369008737	4
Caudate	ENSG00000198270	TMEM116	12	112369086	112450970	-1	protein_coding	89894	TMEM116	1.14999e-09	-0.62084	1	5.744	0	NA	NA	NA	NA	Yes	Adult_Cortex	5.191e-10	rs369008737;rs11066280;rs2074356;NA	4
Caudate	ENSG00000257624	RP1-128M12.3	12	112438543	112438789	-1	pseudogene	NA	NA	NA	NA	1	5.744	0	NA	NA	NA	NA	Yes	IMR90:Mesenchymal_Stem_Cell:Mesendoderm:hESC	3.002e-10	rs369008737;rs11066280;rs2074356;NA	4
Caudate	ENSG00000089248	ERP29	12	112451120	112461255	1	protein_coding	10961	ERP29	0.470649	-0.618385	1	12.4	0	NA	NA	NA	NA	Yes	Adult_Cortex	2.136e-10	rs11066280;rs2074356;NA;rs369008737	4
Caudate	ENSG00000111300	NAA25	12	112464500	112546826	-1	protein_coding	80018	NAA25	0.99999	-1.15626	4	12.4	0	NA	NA	NA	NA	No	NA	2.136e-10	rs11066280;rs2074356;NA;rs369008737	4
Caudate	ENSG00000266370	MIR3657	12	112475403	112475519	-1	miRNA	100500889	MIR3657	NA	NA	1	12.4	0	NA	NA	NA	NA	No	NA	2.136e-10	rs11066280;rs2074356;NA;rs369008737	4
Caudate	ENSG00000258323	RP1-267L14.3	12	112501713	112503559	1	antisense	NA	NA	NA	NA	1	0.563	0	NA	NA	NA	NA	No	NA	2.924e-10	rs11066280;rs2074356;NA	4
Caudate	ENSG00000200688	Y_RNA	12	112506908	112507013	1	misc_RNA	NA	NA	NA	NA	1	0.563	0	NA	NA	NA	NA	No	NA	2.924e-10	rs11066280;rs2074356;NA	4
Caudate	ENSG00000135148	TRAFD1	12	112563305	112591407	1	protein_coding	10906	TRAFD1	1.82692e-05	-1.37633	1	2.52	0	NA	NA	NA	NA	Yes	IMR90:Mesenchymal_Stem_Cell:hESC	3.002e-10	rs11066280;rs2074356;NA	4
Caudate	ENSG00000173064	HECTD4	12	112597992	112819896	-1	protein_coding	283450	HECTD4	1	NA	6	10.56	0	NA	NA	NA	NA	No	NA	7.933e-11	rs11066280;rs2074356;NA;rs369008737	4
Caudate	ENSG00000213152	RPL7AP60	12	112739674	112740467	-1	pseudogene	NA	RPL7AP60	NA	NA	1	10.56	0	NA	NA	NA	NA	No	NA	1.779e-10	rs11066280;rs2074356;NA	4
Caudate	ENSG00000089009	RPL6	12	112842994	112856642	-1	protein_coding	6128	RPL6	0.988288	0.0267551	2	1.625	0	NA	NA	NA	NA	No	NA	8.693e-08	rs11066280	4
Caudate	ENSG00000179295	PTPN11	12	112856155	112947717	1	protein_coding	5781	PTPN11	0.999877	-2.25304	4	2.066	0	NA	NA	NA	NA	No	NA	1.636e-10	rs11066280;NA;rs2074356	4
Caudate	ENSG00000089169	RPH3A	12	113008184	113336686	1	protein_coding	22895	RPH3A	0.738603	0.425292	1	0.213	0	NA	NA	NA	NA	No	NA	1.154e-08	NA	4
Pallidum	ENSG00000256637	RP11-76I14.1	2	104490768	104694236	1	lincRNA	NA	NA	NA	NA	1	5.937	0	NA	NA	NA	NA	No	NA	2.062e-08	rs75978865	1
Pallidum	ENSG00000271938	RP11-589C21.6	8	41996979	41997270	-1	lincRNA	NA	NA	NA	NA	0	0	0	NA	NA	NA	NA	Yes	Mesenchymal_Stem_Cell	2.326e-06	rs2974300	2
Pallidum	ENSG00000261449	RP11-589C21.5	8	42009290	42010281	-1	antisense	NA	NA	NA	NA	0	0	0	NA	NA	NA	NA	Yes	Left_Ventricle:GM12878:IMR90:Mesenchymal_Stem_Cell	2.326e-06	rs2974300	2
Pallidum	ENSG00000070718	AP3M2	8	42010464	42029191	1	protein_coding	10947	AP3M2	4.4e-05	0.298674	0	0	3	0.000194002	1.05911e-34	GTEx/v8/Adipose_Subcutaneous	NA	Yes	Left_Ventricle:GM12878:IMR90:Mesenchymal_Stem_Cell	2.326e-06	rs2974300	2
Pallidum	ENSG00000078668	VDAC3	8	42249142	42263415	1	protein_coding	7419	VDAC3	0.970696	NA	0	0	0	NA	NA	NA	NA	Yes	Adult_Cortex:Fetal_Cortex:GM12878:IMR90:Mesenchymal_Stem_Cell:Mesendoderm:Trophoblast-like_Cell	2.326e-06	rs2974300	2
Pallidum	ENSG00000168575	SLC20A2	8	42273993	42397069	-1	protein_coding	6575	SLC20A2	0.86443	-0.217548	54	11.93	148	4.74386e-84	0	BIOSQTL/BIOS_eQTL_geneLevel:CMC_SVA_cis:GTEx/v8/Adipose_Subcutaneous:GTEx/v8/Adipose_Visceral_Omentum:GTEx/v8/Adrenal_Gland:GTEx/v8/Whole_Blood:GTEx/v8/Artery_Aorta:GTEx/v8/Artery_Tibial:GTEx/v8/Brain_Cortex:GTEx/v8/Breast_Mammary_Tissue:GTEx/v8/Esophagus_Gastroesophageal_Junction:GTEx/v8/Esophagus_Muscularis:GTEx/v8/Lung:GTEx/v8/Nerve_Tibial:GTEx/v8/Cells_Cultured_fibroblasts:GTEx/v8/Spleen:GTEx…	NA	Yes	GM12878:IMR90:Mesenchymal_Stem_Cell:Mesendoderm:Trophoblast-like_Cell	1.678e-09	rs2974300;rs2923404	2
Pallidum	ENSG00000254165	RP11-503E24.2	8	42392672	42393447	-1	antisense	NA	NA	NA	NA	34	9.5	64	1.013e-06	2.49009e-05	GTEx/v8/Heart_Atrial_Appendage:GTEx/v8/Thyroid	NA	No	NA	4.599e-08	rs2974300	2
Pallidum	ENSG00000176209	SMIM19	8	42396298	42409603	1	protein_coding	114926	SMIM19	0.323328	0.309359	54	9.803	148	0	0	BIOSQTL/BIOS_eQTL_geneLevel:xQTLServer_eQTLs:CMC_SVA_cis:CMC_NoSVA_cis:GTEx/v8/Adipose_Subcutaneous:GTEx/v8/Adipose_Visceral_Omentum:GTEx/v8/Adrenal_Gland:GTEx/v8/Cells_EBV-transformed_lymphocytes:GTEx/v8/Whole_Blood:GTEx/v8/Artery_Aorta:GTEx/v8/Artery_Coronary:GTEx/v8/Artery_Tibial:GTEx/v8/Brain_Amygdala:GTEx/v8/Brain_Anterior_cingulate_cortex_BA24:GTEx/v8/Brain_Caudate_basal_ganglia:GTEx/v8/Bra…	NA	Yes	GM12878:IMR90:Mesenchymal_Stem_Cell:Mesendoderm:Trophoblast-like_Cell	1.678e-09	rs2974300;rs2923404	2
Pallidum	ENSG00000272233	RP11-503E24.3	8	42409933	42410336	1	lincRNA	NA	NA	NA	NA	38	9.803	0	NA	NA	NA	NA	No	NA	1.682e-06	rs2974300	2
Pallidum	ENSG00000131931	THAP1	8	42691817	42698468	-1	protein_coding	55145	THAP1	0.899169	0.68512	0	0	0	NA	NA	NA	NA	Yes	Adult_Cortex:IMR90	2.326e-06	rs2974300	2
Pallidum	ENSG00000120925	RNF170	8	42704780	42752433	-1	protein_coding	81790	RNF170	0.648136	-1.60583	0	0	0	NA	NA	NA	NA	Yes	IMR90	2.326e-06	rs2974300	2
Pallidum	ENSG00000266044	MIR4469	8	42751340	42751418	-1	miRNA	100616115	MIR4469	NA	NA	0	0	0	NA	NA	NA	NA	Yes	IMR90	2.326e-06	rs2974300	2
Pallidum	ENSG00000168172	HOOK3	8	42752075	42885682	1	protein_coding	84376	HOOK3	0.999998	-3.65525	0	0	0	NA	NA	NA	NA	Yes	IMR90	2.326e-06	rs2974300	2
Pallidum	ENSG00000168522	FNTA	8	42889337	42940931	1	protein_coding	2339	FNTA	0.988213	-0.580114	0	0	3	0.00010823	0.00129227	GTEx/v8/Skin_Not_Sun_Exposed_Suprapubic	NA	No	NA	1.642e-05	rs2974300	2
Putamen	ENSG00000185053	SGCZ	8	13947373	15095848	-1	protein_coding	137868	SGCZ	0.00198582	0.145185	23	6.755	0	NA	NA	NA	NA	No	NA	1.74e-08	rs13267830	1
Putamen	ENSG00000252035	RNU6-397P	8	14345285	14345388	-1	snRNA	NA	RNU6-397P	NA	NA	16	6.755	0	NA	NA	NA	NA	No	NA	1.74e-08	rs13267830	1
Putamen	ENSG00000263415	AC021760.1	8	14372250	14372374	1	miRNA	NA	NA	NA	NA	2	0.684	0	NA	NA	NA	NA	No	NA	4.299e-07	rs13267830	1
Putamen	ENSG00000104723	TUSC3	8	15274724	15624158	1	protein_coding	7991	TUSC3	0.00189876	-0.135514	0	0	1	1.24944e-05	0.00870779	GTEx/v8/Skin_Sun_Exposed_Lower_leg	NA	No	NA	0.0007405	rs13267830	1
Putamen	ENSG00000231611	AP006216.11	11	116645826	116646592	-1	lincRNA	NA	NA	NA	NA	0	0	2	2.33218e-06	0.0232661	GTEx/v7/Artery_Coronary	NA	No	NA	4.021e-09	NA;rs562422	2
Putamen	ENSG00000110245	APOC3	11	116700422	116703788	1	protein_coding	345	APOC3	0.000678026	0.121255	0	0	1	1.46247e-05	0.038471	GTEx/v7/Heart_Left_Ventricle	NA	No	NA	2.295e-06	rs479591	2
Putamen	ENSG00000235910	APOA1-AS	11	116706833	116726445	1	antisense	NA	APOA1-AS	NA	NA	0	0	3	1.1242e-06	0.0020278	GTEx/v8/Adipose_Subcutaneous	NA	No	NA	1.287e-10	rs479591;NA;rs562422	2
Putamen	ENSG00000231865	SIK3-IT1	11	116756762	116761437	-1	sense_intronic	NA	SIK3-IT1	NA	NA	0	0	2	NA	0.049	CMC_SVA_cis	NA	No	NA	3.686e-06	rs479591	2
Putamen	ENSG00000254851	RP11-109L13.1	11	117006244	117009298	1	pseudogene	NA	NA	NA	NA	0	0	4	1.06217e-05	1.37953e-48	GTEx/v7/Artery_Aorta	NA	No	NA	9.876e-09	rs2276341;rs10790191	2
Putamen	ENSG00000149577	SIDT2	11	117049449	117068160	1	protein_coding	51092	SIDT2	0.0025724	-0.315318	0	0	0	NA	NA	NA	NA	Yes	Fetal_Cortex	9.225e-11	rs4938401:NA;rs562422	2
Putamen	ENSG00000177103	DSCAML1	11	117298489	117688240	-1	protein_coding	57453	DSCAML1	0.999999	NA	114	18.56	26	5.18637e-06	5.79054e-18	GTEx/v8/Pituitary:GTEx/v8/Testis	NA	No	NA	6.896e-12	rs2276341;rs10790191;rs4938401;rs2186762;NA;rs562422;rs34679147;rs479591	2
Putamen	ENSG00000254528	RP11-728F11.4	11	117704434	117709657	1	antisense	NA	NA	NA	NA	0	0	4	2.60553e-05	0.000454088	GTEx/v8/Adipose_Visceral_Omentum:GTEx/v7/Nerve_Tibial	NA	No	NA	5.662e-09	rs479591;rs4938401;rs2276341	2
Putamen	ENSG00000110324	IL10RA	11	117857063	117872196	1	protein_coding	3587	IL10RA	0.968346	-0.921352	0	0	0	NA	NA	NA	NA	Yes	IMR90:Mesenchymal_Stem_Cell:Trophoblast-like_Cell:hESC	4.787e-11	rs2276341:rs2276341;rs10790191:rs4938401;rs2276341;rs2276341:rs2186762:rs4938401:NA;rs562422:rs4938401;rs34679147:rs479591:rs34679147	2
Putamen	ENSG00000255274	TMPRSS4-AS1	11	117886487	117957508	-1	antisense	100526771	TMPRSS4-AS1	NA	NA	0	0	3	6.21372e-05	0.0124049	GTEx/v8/Testis:GTEx/v8/Thyroid	NA	No	NA	3.003e-09	NA;rs562422;rs4938401;rs34679147	2
Putamen	ENSG00000177098	SCN4B	11	118004092	118023603	-1	protein_coding	6330	SCN4B	0.00153523	-0.49413	0	0	0	NA	NA	NA	NA	Yes	Mesenchymal_Stem_Cell	4.787e-11	rs2276341:rs2276341;rs10790191:rs4938401;rs2276341;rs2276341:rs2186762:rs4938401:NA;rs562422	2
Putamen	ENSG00000149575	SCN2B	11	118032666	118047388	-1	protein_coding	6327	SCN2B	0.133477	4.70964	0	0	0	NA	NA	NA	NA	Yes	Adult_Cortex	9.225e-11	rs4938401:NA;rs562422	2
Putamen	ENSG00000160588	MPZL3	11	118097409	118123065	-1	protein_coding	196264	MPZL3	6.5217e-09	0.275003	0	0	0	NA	NA	NA	NA	Yes	IMR90:Mesenchymal_Stem_Cell	4.787e-11	rs2276341:rs2276341;rs10790191:rs4938401;rs2276341;rs2276341:rs2186762:rs4938401:NA;rs562422:rs4938401;rs34679147:rs479591:rs34679147	2
Putamen	ENSG00000149573	MPZL2	11	118124118	118135251	-1	protein_coding	10205	MPZL2	1.2192e-11	1.21741	0	0	0	NA	NA	NA	NA	Yes	IMR90:Mesenchymal_Stem_Cell	4.787e-11	rs2276341:rs2276341;rs10790191:rs4938401;rs2276341;rs2276341:rs2186762:rs4938401:NA;rs562422:rs4938401;rs34679147:rs479591:rs34679147	2
Putamen	ENSG00000167286	CD3D	11	118209669	118213459	-1	protein_coding	915	CD3D	0.00662795	0.00400454	0	0	6	5.81823e-05	0.0478205	GTEx/v8/Esophagus_Mucosa	NA	No	NA	4.762e-10	NA;rs562422;rs479591	2
Putamen	ENSG00000255435	RP11-770J1.3	11	118382626	118401809	-1	antisense	NA	NA	NA	NA	0	0	4	1.70028e-05	0.0260536	GTEx/v7/Muscle_Skeletal	NA	No	NA	2.046e-08	rs562422	2
Putamen	ENSG00000149582	TMEM25	11	118401756	118417995	1	protein_coding	84866	TMEM25	0.000421369	1.1467	0	0	1	1.8171e-05	0.04885	GTEx/v7/Pancreas	NA	No	NA	6.629e-11	rs4938401	2
Putamen	ENSG00000271180	RP11-665C16.8	14	55707340	55707798	-1	pseudogene	NA	NA	NA	NA	0	0	0	NA	NA	NA	NA	Yes	Mesenchymal_Stem_Cell	2.951e-20	rs1959089	3
Putamen	ENSG00000186615	KTN1-AS1	14	55965996	56046828	-1	antisense	100129075	KTN1-AS1	NA	NA	0	0	4	1.1252e-05	0.00767262	BIOSQTL/BIOS_eQTL_geneLevel	NA	No	NA	2.808e-20	rs1959089	3
Putamen	ENSG00000126777	KTN1	14	56025790	56168244	1	protein_coding	3895	KTN1	0.639773	NA	1	3.967	18	6.31912e-07	0.000519921	BIOSQTL/BIOS_eQTL_geneLevel	NA	No	NA	1.269e-20	rs1959089	3
Putamen	ENSG00000139946	PELI2	14	56584532	56768244	1	protein_coding	57161	PELI2	0.948506	-0.606299	0	0	0	NA	NA	NA	NA	Yes	Aorta:Left_Ventricle:Liver:IMR90:Mesenchymal_Stem_Cell:Mesendoderm:Neural_Progenitor_Cell:Trophoblast-like_Cell:hESC	1.269e-20	rs1959089	3
Putamen	ENSG00000259483	RP11-930O11.2	14	56770208	56777479	-1	lincRNA	NA	NA	NA	NA	0	0	0	NA	NA	NA	NA	Yes	Aorta:Left_Ventricle:Liver:Right_Ventricle:Spleen:IMR90:Mesenchymal_Stem_Cell:Mesendoderm:Neural_Progenitor_Cell:Trophoblast-like_Cell:hESC	1.269e-20	rs1959089	3
Putamen	ENSG00000259719	RP11-930O11.1	14	56777598	56811719	1	lincRNA	NA	NA	NA	NA	0	0	0	NA	NA	NA	NA	Yes	Aorta:Left_Ventricle:Liver:Right_Ventricle:Spleen:IMR90:Mesenchymal_Stem_Cell:Mesendoderm:Neural_Progenitor_Cell:Trophoblast-like_Cell:hESC	1.269e-20	rs1959089	3
Putamen	ENSG00000165588	OTX2	14	57267425	57277197	-1	protein_coding	5015	OTX2	0.7446	-0.822575	0	0	0	NA	NA	NA	NA	Yes	Mesenchymal_Stem_Cell:Mesendoderm:hESC	2.951e-20	rs1959089	3
Putamen	ENSG00000248550	OTX2-AS1	14	57279901	57618895	1	antisense	100309464	OTX2-AS1	NA	NA	0	0	0	NA	NA	NA	NA	Yes	Mesenchymal_Stem_Cell:Mesendoderm:hESC	2.951e-20	rs1959089	3
Putamen	ENSG00000258592	RP11-108M12.3	14	57532978	57579378	-1	lincRNA	NA	NA	NA	NA	0	0	0	NA	NA	NA	NA	Yes	Mesenchymal_Stem_Cell:Mesendoderm:hESC	1.269e-20	rs1959089	3
Putamen	ENSG00000070367	EXOC5	14	57670518	57735726	-1	protein_coding	10640	EXOC5	0.996683	-1.28206	0	0	0	NA	NA	NA	NA	Yes	Left_Ventricle:GM12878:IMR90:Mesenchymal_Stem_Cell:Mesendoderm:hESC	1.269e-20	rs1959089	3
Putamen	ENSG00000053770	AP5M1	14	57735627	57756797	1	protein_coding	55745	AP5M1	0.000108637	-0.588213	0	0	0	NA	NA	NA	NA	Yes	Left_Ventricle:GM12878:IMR90:Mesenchymal_Stem_Cell:Mesendoderm:hESC	1.269e-20	rs1959089	3
Putamen	ENSG00000139977	NAA30	14	57857262	57882635	1	protein_coding	122830	NAA30	0.973715	-1.68299	0	0	0	NA	NA	NA	NA	Yes	IMR90:Mesenchymal_Stem_Cell:Mesendoderm:Trophoblast-like_Cell:hESC	1.269e-20	rs1959089	3
Putamen	ENSG00000131966	ACTR10	14	58666798	58701750	1	protein_coding	55860	ACTR10	0.00473624	NA	0	0	0	NA	NA	NA	NA	Yes	Mesenchymal_Stem_Cell	2.951e-20	rs1959089	3
Putamen	ENSG00000268466	AL132989.1	14	58754751	58755865	1	protein_coding	NA	NA	NA	NA	0	0	0	NA	NA	NA	NA	Yes	IMR90	2.951e-20	rs1959089	3
Putamen	ENSG00000141639	MAPK4	18	48086448	48258194	1	protein_coding	5596	MAPK4	0.319052	-0.758279	0	0	0	NA	NA	NA	NA	Yes	Mesenchymal_Stem_Cell	5.625e-08	rs4602107;NA:NA:rs9964447	4
Putamen	ENSG00000082212	ME2	18	48405419	48474691	1	protein_coding	4200	ME2	1.17412e-07	-0.649511	0	0	0	NA	NA	NA	NA	Yes	Mesenchymal_Stem_Cell	5.625e-08	rs4602107;NA:NA:rs9964447	4
Putamen	ENSG00000141642	ELAC1	18	48494361	48514491	1	protein_coding	55520	ELAC1	0.89504	-0.312862	0	0	0	NA	NA	NA	NA	Yes	Mesenchymal_Stem_Cell	5.625e-08	rs4602107;NA:NA:rs9964447	4
Putamen	ENSG00000267699	RP11-729L2.2	18	48494389	48584514	1	protein_coding	NA	NA	NA	NA	0	0	0	NA	NA	NA	NA	Yes	Mesenchymal_Stem_Cell	5.625e-08	rs4602107;NA:NA:rs9964447	4
Putamen	ENSG00000141646	SMAD4	18	48494410	48611415	1	protein_coding	4089	SMAD4	0.967433	-1.75591	0	0	0	NA	NA	NA	NA	Yes	Mesenchymal_Stem_Cell	5.625e-08	rs4602107;NA:NA:rs9964447	4
Putamen	ENSG00000187323	DCC	18	49866542	51057784	1	protein_coding	1630	DCC	0.999999	-0.23995	851	20.6	197	5.53187e-13	2.2398e-38	CMC_SVA_cis:CMC_NoSVA_cis:GTEx/v8/Nerve_Tibial:GTEx/v8/Testis:GTEx/v7/Brain_Cerebellum:GTEx/v7/Nerve_Tibial	NA	Yes	Mesendoderm	9.352e-10	NA;rs4602107;rs9964447;NA:rs4602107	4
Putamen	ENSG00000221291	AC090660.1	18	50463664	50463773	1	miRNA	NA	NA	NA	NA	4	1.481	0	NA	NA	NA	NA	No	NA	0.0239	NA	4
Putamen	ENSG00000263872	hsa-mir-4528	18	50763471	50763560	1	miRNA	NA	NA	NA	NA	45	9.813	0	NA	NA	NA	NA	No	NA	2.663e-07	NA;rs4602107;rs9964447	4
ncRVIS: non-coding residual variation intolerance score; posMapSNPs: The number of SNPs mapped to gene based on positional mapping; posMapMaxCADD: The maximum CADD score of mapped SNPs by positional mapping; eqtlMapSNPs: The number of SNPs mapped to the gene based on eQTL mapping; eqtlMapminP: The minimum eQTL P-value of mapped SNPs; eqtlMapminQ: The minimum eQTL FDR of mapped SNPs; eqtlMapts: Ti…
Reference: https://fuma.ctglab.nl/
